# Supplementary material for: Synthesis of new pyrazolo[1,2,3]triazines by cyclative cleavage of pyrazolyltriazenes
Source: publisher site journal article supplement (doi:10.3762/bjoc.17.187), 2021-11-22
Supplement: Additional file 1 [file 1860-5397-17-187-S1.pdf]

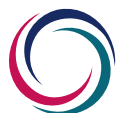

## Supporting Information

for

### **Synthesis of new pyrazolo[1,2,3]triazines by cyclative cleavage of pyrazolyltriazenes**

Nicolai Wippert, Martin Nieger, Claudine Herlan, Nicole Jung and Stefan Bräse

*Beilstein J. Org. Chem.* **2021**, *17*, 2773–2780. [doi:10.3762/bjoc.17.187](https://doi.org/10.3762/bjoc.17.187)

**Experimental section and characterization data, biological assay details, and data availability in chemotion repository**

## Table of contents

|                                                                                                                                                                                                                                                           |     |
|-----------------------------------------------------------------------------------------------------------------------------------------------------------------------------------------------------------------------------------------------------------|-----|
| 1 General remarks.....                                                                                                                                                                                                                                    | S2  |
| 2 Synthesis and characterization.....                                                                                                                                                                                                                     | S3  |
| ( <i>E</i> )-1-Benzyl-3-(3,3-diisopropyltriaz-1-en-1-yl)-1 <i>H</i> -pyrazole-4-carbonitrile ( <b>12a</b> ), ( <i>E</i> )-1-benzyl-5-(3,3-diisopropyltriaz-1-en-1-yl)-1 <i>H</i> -pyrazole-4-carbonitrile ( <b>13a</b> ).....                             | S3  |
| ( <i>E</i> )-3-(3,3-Diisopropyltriaz-1-en-1-yl)-1-(4-methylbenzyl)-1 <i>H</i> -pyrazole-4-carbonitrile ( <b>12b</b> ), ( <i>E</i> )-5-(3,3-diisopropyltriaz-1-en-1-yl)-1-(4-methylbenzyl)-1 <i>H</i> -pyrazole-4-carbonitrile ( <b>13b</b> ).....         | S4  |
| ( <i>E</i> )-1-(3,5-Difluorobenzyl)-3-(3,3-diisopropyltriaz-1-en-1-yl)-1 <i>H</i> -pyrazole-4-carbonitrile ( <b>12c</b> ), ( <i>E</i> )-1-(3,5-difluorobenzyl)-5-(3,3-diisopropyltriaz-1-en-1-yl)-1 <i>H</i> -pyrazole-4-carbonitrile ( <b>13c</b> )..... | S5  |
| ( <i>E</i> )-3-(3,3-Diisopropyltriaz-1-en-1-yl)-1-ethyl-1 <i>H</i> -pyrazole-4-carbonitrile ( <b>12d</b> ), ( <i>E</i> )-5-(3,3-diisopropyltriaz-1-en-1-yl)-1-ethyl-1 <i>H</i> -pyrazole-4-carbonitrile ( <b>13d</b> ) .....                              | S7  |
| ( <i>E</i> )-1-Cyclopentyl-3-(3,3-diisopropyltriaz-1-en-1-yl)-1 <i>H</i> -pyrazole-4-carbonitrile ( <b>12e</b> ), ( <i>E</i> )-1-cyclopentyl-5-(3,3-diisopropyltriaz-1-en-1-yl)-1 <i>H</i> -pyrazole-4-carbonitrile ( <b>13e</b> ) .....                  | S9  |
| ( <i>E</i> )-3-(3,3-Diisopropyltriaz-1-en-1-yl)-1-isobutyl-1 <i>H</i> -pyrazole-4-carbonitrile ( <b>12f</b> ), ( <i>E</i> )-5-(3,3-diisopropyltriaz-1-en-1-yl)-1-isobutyl-1 <i>H</i> -pyrazole-4-carbonitrile ( <b>13f</b> ) .....                        | S10 |
| Ethyl ( <i>E</i> )-2-(4-cyano-3-(3,3-diisopropyltriaz-1-en-1-yl)-1 <i>H</i> -pyrazol-1-yl)acetate ( <b>12g</b> ), ethyl ( <i>E</i> )-2-(4-cyano-5-(3,3-diisopropyltriaz-1-en-1-yl)-1 <i>H</i> -pyrazol-1-yl)acetate ( <b>13g</b> ) .....                  | S10 |
| ( <i>E</i> )-1-(4-Bromobenzyl)-3-(3,3-diisopropyltriaz-1-en-1-yl)-1 <i>H</i> -pyrazole-4-carbonitrile ( <b>12h</b> ), ( <i>E</i> )-1-(4-bromobenzyl)-5-(3,3-diisopropyltriaz-1-en-1-yl)-1 <i>H</i> -pyrazole-4-carbonitrile ( <b>13h</b> ) .....          | S11 |
| ( <i>E</i> )- <i>N</i> -((1-Benzyl-3-(3,3-diisopropyltriaz-1-en-1-yl)-1 <i>H</i> -pyrazol-4-yl)methyl)acetamide ( <b>9a</b> ).....                                                                                                                        | S12 |
| ( <i>E</i> )- <i>N</i> -((1-Benzyl-3-(3,3-diisopropyltriaz-1-en-1-yl)-1 <i>H</i> -pyrazol-4-yl)methyl)benzamide ( <b>9b</b> ) .....                                                                                                                       | S13 |
| ( <i>E</i> )- <i>N</i> -((3-(3,3-Diisopropyltriaz-1-en-1-yl)-1-(4-methylbenzyl)-1 <i>H</i> -pyrazol-4-yl)methyl)-3-methylbutanamide ( <b>9c</b> ) .....                                                                                                   | S14 |
| ( <i>E</i> )- <i>N</i> -((1-(3,5-Difluorobenzyl)-3-(3,3-diisopropyltriaz-1-en-1-yl)-1 <i>H</i> -pyrazol-4-yl)methyl)acetamide ( <b>9d</b> ).....                                                                                                          | S15 |
| ( <i>E</i> )- <i>N</i> -((3-(3,3-Diisopropyltriaz-1-en-1-yl)-1-ethyl-1 <i>H</i> -pyrazol-4-yl)methyl)acetamide ( <b>9e</b> ) .....                                                                                                                        | S16 |
| ( <i>E</i> )- <i>N</i> -((1-Cyclopentyl-3-(3,3-diisopropyltriaz-1-en-1-yl)-1 <i>H</i> -pyrazol-4-yl)methyl)acetamide ( <b>9f</b> ) .....                                                                                                                  | S17 |
| ( <i>E</i> )- <i>N</i> -((1-Cyclopentyl-3-(3,3-diisopropyltriaz-1-en-1-yl)-1 <i>H</i> -pyrazol-4-yl)methyl)benzamide ( <b>9g</b> ) .....                                                                                                                  | S18 |
| ( <i>E</i> )- <i>N</i> -((3-(3,3-Diisopropyltriaz-1-en-1-yl)-1-isobutyl-1 <i>H</i> -pyrazol-4-yl)methyl)acetamide ( <b>9h</b> ).....                                                                                                                      | S19 |
| ( <i>E</i> )-2-(4-(Acetamidomethyl)-3-(3,3-diisopropyltriaz-1-en-1-yl)-1 <i>H</i> -pyrazol-1-yl)ethyl acetate ( <b>9i</b> ) .....                                                                                                                         | S20 |
| 1-(6-Benzyl-4,6-dihydro-3 <i>H</i> -pyrazolo[3,4- <i>d</i> ][1,2,3]triazin-3-yl)ethan-1-one ( <b>5a</b> ).....                                                                                                                                            | S21 |
| (6-Benzyl-4,6-dihydro-3 <i>H</i> -pyrazolo[3,4- <i>d</i> ][1,2,3]triazin-3-yl)(phenyl)methanone ( <b>5b</b> ).....                                                                                                                                        | S21 |
| 3-Methyl-1-(6-(4-methylbenzyl)-4,6-dihydro-3 <i>H</i> -pyrazolo[3,4- <i>d</i> ][1,2,3]triazin-3-yl)butan-1-one ( <b>5c</b> ) .....                                                                                                                        | S22 |
| 1-(6-(3,5-Difluorobenzyl)-4,6-dihydro-3 <i>H</i> -pyrazolo[3,4- <i>d</i> ][1,2,3]triazin-3-yl)ethan-1-one ( <b>5d</b> ) .....                                                                                                                             | S23 |
| 1-(6-Ethyl-4,6-dihydro-3 <i>H</i> -pyrazolo[3,4- <i>d</i> ][1,2,3]triazin-3-yl)ethan-1-one ( <b>5e</b> ) .....                                                                                                                                            | S24 |
| 1-(6-Cyclopentyl-4,6-dihydro-3 <i>H</i> -pyrazolo[3,4- <i>d</i> ][1,2,3]triazin-3-yl)ethan-1-one ( <b>5f</b> ) .....                                                                                                                                      | S24 |
| (6-Cyclopentyl-4,6-dihydro-3 <i>H</i> -pyrazolo[3,4- <i>d</i> ][1,2,3]triazin-3-yl)(phenyl)methanone ( <b>5g</b> ) .....                                                                                                                                  | S25 |
| 1-(6-Isobutyl-4,6-dihydro-3 <i>H</i> -pyrazolo[3,4- <i>d</i> ][1,2,3]triazin-3-yl)ethan-1-one ( <b>5h</b> ).....                                                                                                                                          | S26 |
| 2-(3-Acetyl-3,4-dihydro-6 <i>H</i> -pyrazolo[3,4- <i>d</i> ][1,2,3]triazin-6-yl)ethyl acetate ( <b>5i</b> ) .....                                                                                                                                         | S26 |
| 3. Amidation of triazenes <b>13</b> .....                                                                                                                                                                                                                 | S28 |
| 4. Crystal structures of compounds <b>12h</b> and <b>13c</b> .....                                                                                                                                                                                        | S33 |
| 5. Biological assays .....                                                                                                                                                                                                                                | S35 |
| 6. References .....                                                                                                                                                                                                                                       | S46 |

## 1 General remarks

NMR spectra of dissolved samples were recorded on a Bruker Ascend 400 at 21 °C. Chemical shifts ( $\delta$ ) are expressed in parts per million (ppm) downfield from tetramethylsilane (TMS). References for  $^1\text{H}$  NMR and  $^{13}\text{C}$  NMR were the residual solvent peaks of chloroform- $d_1$  ( $^1\text{H}$ :  $\delta = 7.26$  ppm;  $^{13}\text{C}$ :  $\delta = 77.0$  ppm) if not stated otherwise. All coupling constants ( $J$ ) are absolute values and are expressed in hertz (Hz). The description of signals includes: s = singlet, d = doublet, t = triplet, m = multiplet, dd = doublet of doublets, and ddd = double doublet of doublets and so forth. The spectra were analyzed according to the first order. The assignments of the signal structure in  $^1\text{H}$  NMR were made by the detected multiplicity and for  $^{13}\text{C}$  NMR by DEPT 90- and DEPT 135-spectra (DEPT = distortionless enhancement by polarization transfer) and are described as follows: + = primary or tertiary C-atom (positive DEPT-signal), - = secondary C-atom (negative signal) and  $\text{C}_q$  = quaternary C-atom (no signal). Furthermore, 2D experiments such as COSY (correlated spectroscopy) and HSQC (heteronuclear single quantum coherence) were performed.

IR spectra were recorded on a Bruker Alpha ATR spectrometer. The compounds were measured as pure substances by the ATR (ATR = attenuated total reflection) technique. The position of the absorption band is given in wave numbers  $\tilde{\nu}$  in  $\text{cm}^{-1}$ . The intensities of the bands were characterized as follows: vs = very strong (0–20% T), s = strong (21–40 % T), m = medium (41–60% T), w = weak (61–80% T), vw = very weak (81–100% T).

Mass spectra were measured by EIMS (electron impact mass spectrometry) and were recorded on a Finnigan MAT 95. The peaks are given as mass-to-charge-ratio ( $m/z$ ). The molecule peak is given as  $[\text{M}]^+$  and characteristic fragment peaks are given as  $[\text{M}-\text{fragment}]^+$  or  $[\text{fragment}]^+$ . The signal intensities are given in percent, relatively to the intensity of the base signal (100%). For the high resolution mass, the following abbreviations were used: calcd = calculated data, found = measured data. The software of FAB and EI adds the mass of one electron.

Analytical thin layer chromatography (TLC) was carried out on Merck silica gel coated aluminum plates (silica gel 60, F<sub>254</sub>), detected under UV light at 254 nm or stained with “Seebach staining solution” (mixture of molybdate phosphoric acid, cerium(IV) sulfate tetrahydrate, sulfuric acid and water) or basic potassium permanganate solution. Solvent mixtures are understood as volume/volume.

All solvents, reagents and chemicals were used as purchased unless stated otherwise.

Air or moisture-sensitive reactions were carried out under argon atmosphere in oven-dried and previously evacuated glass ware. Liquids were transferred with plastic syringes and steel cannula. Silica gel 60 ( $0.040 \times 0.063$  mm, Geduran®, Merck) was used as stationary phase and solvents of *p.a.* quality were used as mobile phase.

InChI Strings were generated with InChI Version (1.04), Smiles with the SMILES Version of Daylight.

## 2 Synthesis and characterization

### 5-[(*E*)-[Di(propan-2-yl)amino]diazenyl]-1*H*-pyrazole-4-carbonitrile (**15**)

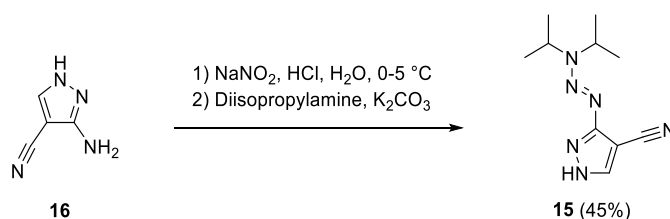

**15:** 5-[(*E*)-[di(propan-2-yl)amino]diazenyl]-1*H*-pyrazole-4-carbonitrile; Formula: C<sub>10</sub>H<sub>16</sub>N<sub>6</sub>; Exact Mass: 220.1436; Smiles: CC(N(C(C)C)/N=N/c1n[nH]cc1C#N)C; InChIKey: UCPMQTTXXMXIFF-CCEZHUSRSA-N.

To a mixture of 5-amino-1*H*-pyrazole-4-carbonitrile (2.00 g, 19 mmol, 1.00 equiv) in 6 mL of water, conc. hydrochloric acid (6.17 mL, 74 mmol, 4.00 equiv) was added. The mixture was cooled to 0 °C and a solution of sodium nitrite (1.91 g, 28 mmol, 1.50 equiv) in 20 mL of water was added. Additional 10 mL of water were added to get a stirrable slurry. After stirring for 30 min at 0 °C, a mixture of diisopropylamine (2.43 g, 3.37 mL, 24 mmol, 1.30 equiv) and dipotassium carbonate (5.11 g, 37 mmol, 2.00 equiv) in 50 mL of water were added. The reaction mixture was stirred at 21 °C until TLC showed that all diazonium salt had disappeared. The reaction mixture was extracted with 3 × 150 mL of DCM. Some precipitate was formed between the layers which had to be filtered off (clogged the frit). The combined organic phases were washed with 3 × 60 mL of water, dried over sodium sulfate, and the solvent was evaporated under reduced pressure to give the desired product. The obtained crude product was purified *via* flash chromatography on silica gel using cyclohexane/ethyl acetate 4:1 to 2:1 to give the target compound in 45% yield (1.85 g, 8.4 mmol).

$R_f$  = 0.08 (cyclohexane/ethyl acetate 4:1). <sup>1</sup>H NMR (400 MHz, CDCl<sub>3</sub>, ppm)  $\delta$  = 9.04 (bs, 1H), 7.76 (s, 1H), 5.27 (hept,  $J$  = 6.80 Hz, 1H), 4.08 (hept,  $J$  = 6.7 Hz, 1H), 1.44 (d,  $J$  = 6.6 Hz, 6H), 1.28 (d,  $J$  = 6.8 Hz, 6H); <sup>13</sup>C NMR (100 MHz, CDCl<sub>3</sub>, ppm)  $\delta$  = 158.4, 141.3, 115.4 (+, CH), 79.7, 50.8 (+, CH), 47.6 (+, CH), 23.4 (+, 2C, CH<sub>3</sub>), 19.2 (+, 2C, CH<sub>3</sub>); EI ( $m/z$ , 70 eV, 80 °C): 220 (100) [M]<sup>+</sup>, 135 (23), 134 (11), 120 (35), 109 (16), 108 (37), 100 (32), 86 (87), 84 (38), 70 (15), 69 (13), 65 (23), 58 (74), 52 (21); HRMS (C<sub>10</sub>H<sub>16</sub>N<sub>6</sub>): Calcd 220.1436, Found 220.1438; IR (ATR,  $\tilde{\nu}$ ) = 611, 629, 643, 713, 722, 751, 771, 816, 839, 861, 880, 899, 928, 948, 1031, 1067, 1077, 1096, 1130, 1163, 1194, 1217, 1231, 1262, 1295, 1306, 1319, 1339, 1364, 1378, 1392, 1412, 1451, 1466, 1492, 1543, 1572, 1720, 1792, 2183, 2227, 2873, 2934, 2973, 3053, 3095, 3143, 3231 cm<sup>-1</sup>.

Additional information on the chemical synthesis is available *via* Chemotion repository:

<https://doi.org/10.14272/reaction/SA-FUHFF-UHFFFADPSC-UCPMQTTXXM-UHFFFADPSC-NUHFF-NRHPV-NUHFF-ZZZ>

Additional information on the analysis of the target compound is available *via* Chemotion repository:

<https://doi.org/10.14272/UCPMQTTXXMXIFF-CCEZHUSRSA-N.1>

### (*E*)-1-Benzyl-3-(3,3-diisopropyltriaz-1-en-1-yl)-1*H*-pyrazole-4-carbonitrile (**12a**), (*E*)-1-benzyl-5-(3,3-diisopropyltriaz-1-en-1-yl)-1*H*-pyrazole-4-carbonitrile (**13a**)

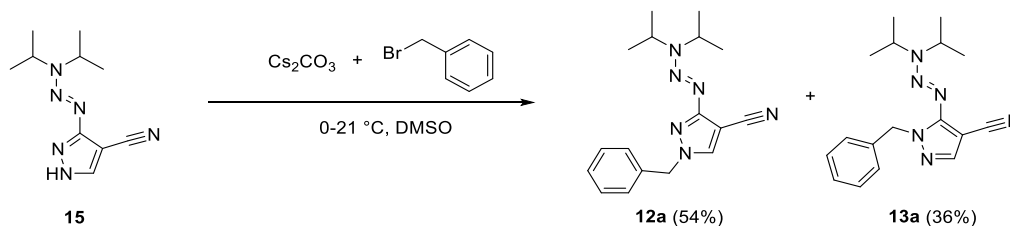

(*E*)-3-(3,3-Diisopropyltriaz-1-en-1-yl)-4-carbonitrile-1*H*-pyrazole (**15**, 76.5 mg, 347  $\mu$ mol, 1.00 equiv) was dissolved in 10 mL of DMSO. Cesium carbonate (133 mg, 409  $\mu$ mol, 1.18 equiv) was added and the solution was

cooled to 0 °C. Bromomethylbenzene (117 mg, 80.9  $\mu$ L, 681  $\mu$ mol, 1.96 equiv) was added and the vial was closed and slowly warmed to 21 °C. The reaction mixture was stirred at 21 °C for 48 hours. The reaction was quenched by addition of ice and was extracted with EtOAc (3  $\times$  15 mL). The obtained organic layers were co-evaporated with Celite(R) to give the Celite-immobilized crude product. The obtained crude product was purified *via* flash chromatography on silica gel using cyclohexane/ethyl acetate 10:1 to 4:1, giving (*E*)-1-benzyl-3-(3,3-diisopropyltriaz-1-en-1-yl)-1*H*-pyrazole-4-carbonitrile (**12a**, 58.2 mg, 188  $\mu$ mol, 54% yield) as a light-orange solid and (*E*)-1-benzyl-5-(3,3-diisopropyltriaz-1-en-1-yl)-1*H*-pyrazole-4-carbonitrile (**13a**, 38.7 mg, 125  $\mu$ mol, 36% yield) as a light-orange solid.

**12a:** (*E*)-1-benzyl-3-(3,3-diisopropyltriaz-1-en-1-yl)-1*H*-pyrazole-4-carbonitrile; Formula: C<sub>17</sub>H<sub>22</sub>N<sub>6</sub>; Exact Mass: 310.1906; Smiles: N#Cc1cn(nc1/N=N/C(C)C)C(C)C)Cc1ccccc1; InChIKey: AONLLYWWGOIMLR-XUTLUUPISA-N

$R_f$  = 0.23 (cyclohexane/ethyl acetate 4:1). <sup>1</sup>H NMR (400 MHz, CDCl<sub>3</sub>, ppm)  $\delta$  = 7.53 (s, 1H), 7.30–7.15 (m, 5H), 5.32 (hept,  $J$  = 6.8 Hz, 1H), 5.13 (s, 2H), 3.93 (hept,  $J$  = 6.6 Hz, 1H), 1.35 (d,  $J$  = 6.6 Hz, 6H), 1.15 (d,  $J$  = 6.8 Hz, 6H); <sup>13</sup>C NMR (100 MHz, CDCl<sub>3</sub>, ppm)  $\delta$  = 162.9, 135.7 (+, CH), 134.8, 129.1 (+, 2C, CH), 128.8 (+, CH), 128.3 (+, 2C, CH), 115.3, 81.5, 56.9 (–, CH<sub>2</sub>), 49.9 (+, CH), 46.5 (+, CH), 23.3 (+, 2C, CH<sub>3</sub>), 19.3 (+, 2C, CH<sub>3</sub>); EI ( $m/z$ , 70 eV, 80 °C): 310 (39) [M]<sup>+</sup>, 210 (60), 181 (13), 131 (17), 100 (48), 92 (11), 91 (100), 86 (10), 84 (14), 77 (22), 71 (12), 70 (10), 69 (35), 58 (54), 57 (23), 55 (15). HRMS (C<sub>17</sub>H<sub>22</sub>N<sub>6</sub>): Calcd 310.1906, Found 310.1905; IR (ATR,  $\tilde{\nu}$ ) = 3122 (w), 3058 (vw), 3031 (vw), 2979 (w), 2934 (w), 2868 (vw), 2223 (m), 1816 (vw), 1700 (vw), 1604 (vw), 1537 (s), 1497 (w), 1456 (m), 1412 (vs), 1368 (vs), 1353 (s), 1326 (w), 1313 (w), 1261 (vs), 1239 (m), 1227 (vs), 1184 (w), 1149 (vs), 1132 (m), 1095 (m), 1081 (w), 1028 (s), 1001 (m), 970 (w), 909 (w), 881 (w), 851 (m), 843 (m), 819 (w), 799 (w), 752 (w), 741 (s), 721 (m), 711 (vs), 694 (s), 649 (m), 632 (w) cm<sup>–1</sup>.

**13a:** (*E*)-1-benzyl-5-(3,3-diisopropyltriaz-1-en-1-yl)-1*H*-pyrazole-4-carbonitrile; Formula: C<sub>17</sub>H<sub>22</sub>N<sub>6</sub>; Exact Mass: 310.1906; Smiles: CC(N(C(C)C)/N=N/c1n(nc1C#N)Cc1ccccc1)C; InChIKey: AQYSAXXLCHFEGV-QZQOTICOSA-N

$R_f$  = 0.30 (cyclohexane/ethyl acetate 4:1). <sup>1</sup>H NMR (400 MHz, CDCl<sub>3</sub>, ppm)  $\delta$  = 7.65 (s, 1H), 7.35–7.21 (m, 5H), 5.36 (s, 2H), 5.16 (hept,  $J$  = 6.9 Hz, 1H), 4.08 (hept,  $J$  = 6.6 Hz, 1H), 1.44 (d,  $J$  = 6.6 Hz, 6H), 1.26 (d,  $J$  = 6.8 Hz, 6H). <sup>13</sup>C NMR (100 MHz, CDCl<sub>3</sub>, ppm)  $\delta$  = 154.8, 142.5 (+, CH), 136.5, 128.8 (+, 2C, CH), 128.0 (+, CH), 127.9 (+, 2C, CH), 116.0, 77.9, 52.3 (–, CH<sub>2</sub>), 51.4 (+, CH), 48.1 (+, CH), 23.3 (+, 2C, CH<sub>3</sub>), 19.0 (+, 2C, CH<sub>3</sub>); EI ( $m/z$ , 70 eV, 70 °C): 311 (10) [M+H]<sup>+</sup>, 310 (55) [M]<sup>+</sup>, 210 (26), 181 (20), 131 (30), 119 (12), 100 (42), 91 (78), 69 (100), 58 (21). HRMS (C<sub>17</sub>H<sub>22</sub>N<sub>6</sub>): Calcd 310.1906, Found 310.1905; IR (ATR,  $\tilde{\nu}$ ) = 3111 (w), 3089 (vw), 3067 (vw), 3031 (w), 2987 (w), 2975 (w), 2935 (w), 2871 (w), 2220 (s), 1761 (vw), 1606 (vw), 1533 (m), 1494 (w), 1466 (w), 1455 (m), 1441 (w), 1419 (vs), 1391 (s), 1375 (vs), 1363 (vs), 1313 (m), 1272 (s), 1238 (vs), 1211 (vs), 1164 (s), 1132 (s), 1103 (vs), 1078 (m), 1026 (vs), 946 (w), 936 (w), 909 (m), 884 (s), 850 (w), 815 (w), 785 (m), 722 (vs), 710 (s), 691 (vs), 666 (m), 630 (m), 615 (w) cm<sup>–1</sup>.

Additional information on the chemical synthesis is available *via* Chemotion repository:

<https://doi.org/10.14272/reaction/SA-FUHFF-UHFFFADPSC-KRKANRSFKB-UHFFFADPSC-NUHFF-NVGOA-NUHFF-ZZZ>

Additional information on the analysis of the target compound is available *via* Chemotion repository:

<https://doi.org/10.14272/AONLLYWWGOIMLR-XUTLUUPISA-N.1>

<https://doi.org/10.14272/AQYSAXXLCHFEGV-QZQOTICOSA-N.1>

**(*E*)-3-(3,3-Diisopropyltriaz-1-en-1-yl)-1-(4-methylbenzyl)-1*H*-pyrazole-4-carbonitrile (**12b**), (*E*)-5-(3,3-diisopropyltriaz-1-en-1-yl)-1-(4-methylbenzyl)-1*H*-pyrazole-4-carbonitrile (**13b**)**

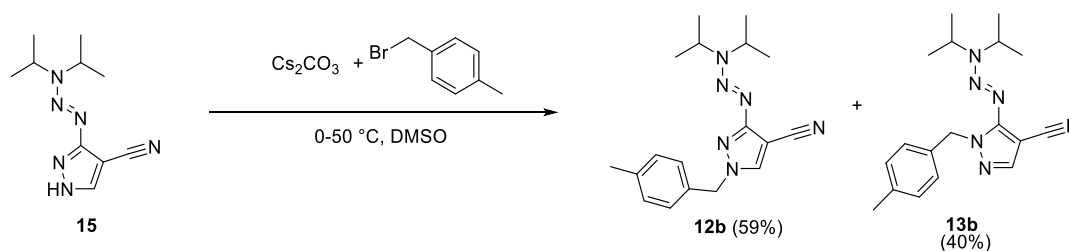

In a vial, 5-(*E*)-[di(propan-2-yl)amino]diaz-enyl]-1*H*-pyrazole-4-carbonitrile (**15**, 563 mg, 2.55 mmol, 1.00 equiv) was dissolved in 20 mL of DMSO. The solution was cooled to 0 °C. Cesium carbonate (1.00 g, 3.07 mmol, 1.20 equiv) and 1-(bromomethyl)-4-methylbenzene (700 mg, 3.78 mmol, 1.48 equiv) were added. The mixture was stirred first at 21 °C for 2 hours, then at 50 °C for 12 hours. The reaction was quenched with ice and extracted with EtOAc (3 × 20 mL). The solvent was removed under reduced pressure to give the crude product. The obtained crude product was purified *via* flash chromatography on silica gel using cyclohexane/ethyl acetate 10:1 to 4:1, giving 3-(3,3-diisopropyltriaz-1-en-1-yl)-1-(4-methylbenzyl)-1*H*-pyrazole-4-carbonitrile (**12b**, 485 mg, 1.50 mmol, 59% yield) as a colorless solid and 5-(3,3-diisopropyltriaz-1-en-1-yl)-1-(4-methylbenzyl)-1*H*-pyrazole-4-carbonitrile (**13b**, 329 mg, 1.01 mmol, 40% yield) as a colorless solid.

**12b:** (E)-3-(3,3-diisopropyltriaz-1-en-1-yl)-1-(4-methylbenzyl)-1*H*-pyrazole-4-carbonitrile; Formula: C<sub>18</sub>H<sub>24</sub>N<sub>6</sub>; Exact Mass: 324.2062; Smiles: N#Cc1cn(nc1/N=N/N(C(C)C)C(C)C)Cc1ccc(cc1)C; InChIKey: GJXVYPGROXVEAZ-LSDHQDQOSA-N

*R<sub>f</sub>* = 0.34 (cyclohexane/ethyl acetate 4:1). <sup>1</sup>H NMR (400 MHz, CDCl<sub>3</sub>, ppm) δ = 7.58 (s, 1H), 7.21–7.10 (m, 4H), 5.39 (hept, *J* = 7.1 Hz, 1H), 5.16 (s, 2H), 4.01 (hept, *J* = 6.6 Hz, 1H), 2.33 (s, 3H), 1.43 (d, *J* = 6.7 Hz, 6H), 1.23 (d, *J* = 6.8 Hz, 6H); <sup>13</sup>C NMR (100 MHz, CDCl<sub>3</sub>, ppm) δ = 162.8, 138.6, 135.5 (+, CH), 131.7, 129.8 (+, CH, 2C), 128.4 (+, CH, 2C), 115.3, 81.3, 56.6 (–, CH<sub>2</sub>), 49.8 (+, CH), 46.4 (+, CH), 23.3 (+, CH<sub>3</sub>, 2C), 21.2 (+, CH<sub>3</sub>), 19.3 (+, CH<sub>3</sub>, 2C); MS (FAB, Matrix: 3-NBA): *m/z* (%) = 326 (22) [M+2H]<sup>+</sup>, 325 (100) [M+H]<sup>+</sup>, 324 (20) [M]<sup>+</sup>, 224 (20), 154 (10), 105 (45), 100 (11), 95 (10). HRMS–FAB (*m/z*): [M+H]<sup>+</sup> Calcd for C<sub>18</sub>H<sub>25</sub>N<sub>6</sub> 325.2141; Found 325.2139; IR (ATR,  $\tilde{\nu}$ ) = 3132 (vw), 2978 (w), 2931 (w), 2873 (vw), 2218 (vs), 1615 (vw), 1540 (s), 1513 (w), 1468 (w), 1456 (m), 1439 (w), 1414 (vs), 1405 (vs), 1384 (s), 1370 (vs), 1353 (s), 1310 (w), 1264 (vs), 1232 (s), 1203 (w), 1157 (vs), 1132 (m), 1115 (w), 1099 (m), 1031 (m), 1021 (w), 1001 (w), 932 (vw), 912 (w), 843 (w), 820 (s), 782 (s), 752 (s), 717 (vs), 693 (m), 640 (w), 630 (m) cm<sup>–1</sup>.

**13b:** (E)-5-(3,3-diisopropyltriaz-1-en-1-yl)-1-(4-methylbenzyl)-1*H*-pyrazole-4-carbonitrile; Formula: C<sub>18</sub>H<sub>24</sub>N<sub>6</sub>; Exact Mass: 324.2062; Smiles: N#Cc1cnn(c1/N=N/N(C(C)C)C(C)C)Cc1ccc(cc1)C; InChIKey: RAZAPXAZBSDVNH-QURGRASLSA-N

*R<sub>f</sub>* = 0.43 (cyclohexane/ethyl acetate 4:1). <sup>1</sup>H NMR (400 MHz, CDCl<sub>3</sub>, ppm) δ = 7.64 (s, 1H), 7.22–7.07 (m, 4H), 5.32 (s, 2H), 5.19 (hept, *J* = 6.8 Hz, 1H), 4.10 (hept, *J* = 6.6 Hz, 1H), 2.31 (s, 3H), 1.45 (d, *J* = 6.6 Hz, 6H), 1.28 (d, *J* = 6.8 Hz, 6H). <sup>13</sup>C NMR (100 MHz, CDCl<sub>3</sub>, ppm) δ = 154.7, 142.4 (+, CH), 137.8, 133.5, 129.4 (+, CH, 2C), 128.0 (+, CH, 2C), 116.0, 77.8, 52.0 (–, CH<sub>2</sub>), 51.4 (+, CH), 48.1 (+, CH), 23.2 (+, CH<sub>3</sub>, 2C), 21.2 (+, CH<sub>3</sub>), 19.0 (+, CH<sub>3</sub>, 2C); MS (FAB, Matrix: 3-NBA): *m/z* (%) = 326 (22) [M+2H]<sup>+</sup>, 325 (100) [M+H]<sup>+</sup>, 324 (29) [M]<sup>+</sup>, 105 (49), 100 (11). HRMS–FAB (*m/z*): [M+H]<sup>+</sup> Calcd for C<sub>18</sub>H<sub>25</sub>N<sub>6</sub> 325.2141; Found 325.2140; IR (ATR,  $\tilde{\nu}$ ) = 3121 (vw), 2972 (w), 2945 (w), 2873 (w), 2221 (vs), 1741 (vw), 1615 (vw), 1537 (m), 1514 (w), 1489 (w), 1466 (w), 1422 (vs), 1394 (vs), 1378 (vs), 1366 (vs), 1322 (w), 1279 (m), 1266 (s), 1238 (vs), 1208 (s), 1173 (w), 1162 (m), 1133 (m), 1102 (vs), 1026 (vs), 990 (w), 945 (w), 925 (w), 909 (w), 881 (w), 873 (m), 851 (w), 839 (w), 817 (m), 810 (w), 762 (s), 754 (vs), 728 (w), 707 (m), 659 (w), 642 (vw), 618 (m), cm<sup>–1</sup>.

Additional information on the chemical synthesis is available *via* Chemotion repository:

<https://doi.org/10.14272/reaction/SA-FUHFF-UHFFFADPSC-UZTCZZRTCD-UHFFFADPSC-NUHFF-NPQQK-NUHFF-ZZZ>

Additional information on the analysis of the target compound is available *via* Chemotion repository:

<https://doi.org/10.14272/GJXVYPGROXVEAZ-LSDHQDQOSA-N.1>

<https://doi.org/10.14272/RAZAPXAZBSDVNH-QURGRASLSA-N.1>

(*E*)-1-(3,5-Difluorobenzyl)-3-(3,3-diisopropyltriaz-1-en-1-yl)-1*H*-pyrazole-4-carbonitrile (**12c**),  
(*E*)-1-(3,5-Difluorobenzyl)-5-(3,3-diisopropyltriaz-1-en-1-yl)-1*H*-pyrazole-4-carbonitrile (**13c**)

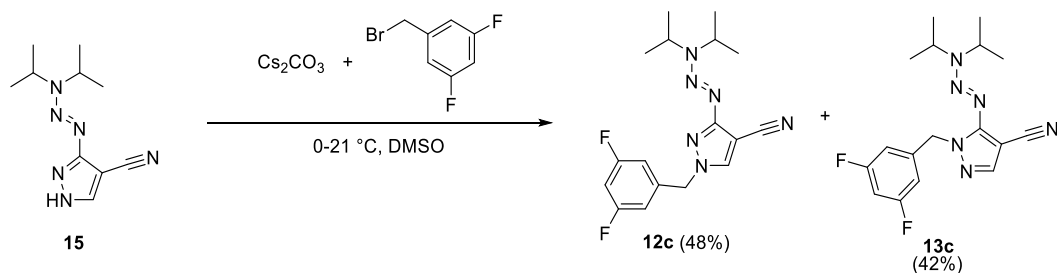

In a vial, 5-[(*E*)-(diisopropylamino)azo]-1*H*-pyrazole-4-carbonitrile (**15**, 75.0 mg, 340  $\mu$ mol, 1.00 equiv) was dissolved in 5 mL of DMSO. Cesium carbonate (133 mg, 409  $\mu$ mol, 1.20 equiv) was added and the solution was cooled to 0 °C. 1-(Bromomethyl)-3,5-difluorobenzene (141 mg, 88.1  $\mu$ L, 681  $\mu$ mol, 2.00 equiv) was added and the vial was closed and slowly warmed to 21 °C. The reaction mixture was stirred at 21 °C for 48 hours. The reaction was quenched by addition of ice and was extracted with EtOAc (3  $\times$  15 mL). The obtained organic layers were co-evaporated with Celite(R) to give the Celite-immobilized crude product. The obtained crude product was purified *via* flash-chromatography on silica gel using cyclohexane/ethyl acetate 10:1 to 4:1, giving (*E*)-1-(3,5-difluorobenzyl)-3-(3,3-diisopropyltriaz-1-en-1-yl)-1*H*-pyrazole-4-carbonitrile (**12c**, 57.0 mg, 165  $\mu$ mol, 48% yield) as a colorless solid and (*E*)-1-(3,5-difluorobenzyl)-5-(3,3-diisopropyltriaz-1-en-1-yl)-1*H*-pyrazole-4-carbonitrile (**13c**, 49.2 mg, 142  $\mu$ mol, 42% yield) as a colorless solid.

**12c:** (E)-1-(3,5-difluorobenzyl)-3-(3,3-diisopropyltriaz-1-en-1-yl)-1*H*-pyrazole-4-carbonitrile; Formula: C<sub>17</sub>H<sub>20</sub>F<sub>2</sub>N<sub>6</sub>; Exact Mass: 346.1718; Smiles: N#Cc1cn(nc1/N=N/N(C(C)C)C(C)C)Cc1cc(F)cc(c1)F; InChIKey: WSQPCVJPBSUDNZ-XTQSDGFTSA-N

*R*<sub>f</sub> = 0.21 (cyclohexane/ethyl acetate 4:1). <sup>1</sup>H NMR (400 MHz, CDCl<sub>3</sub>, ppm)  $\delta$  = 7.74 (s, 1H), 6.83–6.68 (m, 3H), 5.39 (hept, *J* = 6.8 Hz, 1H), 5.19 (s, 2H), 4.03 (hept, *J* = 6.5 Hz, 1H), 1.43 (d, *J* = 6.6 Hz, 6H), 1.23 (d, *J* = 6.8 Hz, 6H); <sup>13</sup>C NMR (100 MHz, CDCl<sub>3</sub>, ppm)  $\delta$  = 163.3 (dd, *J* = 250.3 Hz, *J* = 12.6 Hz, 2C), 163.2, 138.9 (t, *J* = 9.0 Hz), 136.2 (+, CH), 115.0, 111.7 (dd, *J* = 18.8 Hz, *J* = 7.3 Hz; +, CH, 2C), 104.1 (t, *J* = 25.2 Hz; +, CH), 82.1, 55.7 (t, *J* = 2.3 Hz; –, CH<sub>2</sub>), 50.0 (+, CH), 46.7 (+, CH), 23.3 (+, CH<sub>3</sub>, 2C), 19.2 (+, CH<sub>3</sub>, 2C); <sup>19</sup>F NMR (376 MHz, CDCl<sub>3</sub>, ppm)  $\delta$  = -108.33 (2F); EI (m/z, 70 eV, 80 °C): 346 (9) [M]<sup>+</sup>, 253 (24), 252 (16), 246 (11), 127 (100), 101 (11), 100 (12), 83 (11), 77 (10), 71 (13), 69 (24), 58 (27), 57 (29), 55 (15). HRMS (C<sub>17</sub>H<sub>20</sub>N<sub>6</sub>F<sub>2</sub>): Calcd 346.1718, Found 346.1716; IR (ATR,  $\tilde{\nu}$ ) = 3125 (vw), 3098 (vw), 3055 (vw), 2989 (w), 2976 (w), 2962 (w), 2932 (w), 2873 (w), 2221 (s), 1625 (s), 1598 (m), 1540 (s), 1460 (s), 1439 (m), 1411 (vs), 1368 (vs), 1356 (vs), 1329 (w), 1317 (vs), 1262 (vs), 1230 (s), 1188 (w), 1156 (vs), 1143 (s), 1119 (vs), 1099 (s), 1031 (s), 1014 (s), 997 (s), 976 (w), 948 (w), 909 (w), 892 (w), 873 (m), 849 (vs), 839 (vs), 796 (s), 734 (s), 718 (vs), 690 (m), 654 (s), 633 (m), 612 (w), 601 (w) cm<sup>-1</sup>.

**13c:** (E)-1-(3,5-difluorobenzyl)-5-(3,3-diisopropyltriaz-1-en-1-yl)-1*H*-pyrazole-4-carbonitrile; Formula: C<sub>17</sub>H<sub>20</sub>F<sub>2</sub>N<sub>6</sub>; Exact Mass: 346.1718; Smiles: CC(N(C(C)C)/N=N/c1n(ncc1C#N)C)Cc1cc(F)cc(c1)F; InChIKey: ZFEWCQZPKGQXCJ-GHVJWSGMSA-N

*R*<sub>f</sub> = 0.30 (cyclohexane/ethyl acetate 4:1). <sup>1</sup>H NMR (400 MHz, CDCl<sub>3</sub>, ppm)  $\delta$  = 7.65 (s, 1H), 6.89–6.73 (m, 2H), 6.72–6.64 (m, 1H), 5.31 (s, 2H), 5.14 (hept, *J* = 6.8 Hz, 1H), 4.10 (hept, *J* = 6.6 Hz, 1H), 1.44 (d, *J* = 6.7 Hz, 6H), 1.25 (d, *J* = 6.8 Hz, 6H); <sup>13</sup>C NMR (100 MHz, CDCl<sub>3</sub>, ppm)  $\delta$  = 163.1 (dd, *J* = 249.4 Hz, *J* = 12.7 Hz, 2C), 154.9, 142.6 (+, CH), 140.2 (t, *J* = 9.1 Hz), 115.6, 110.8 (dd, *J* = 18.6 Hz, *J* = 7.0 Hz, CH, 2C), 103.4 (t, *J* = 25.2 Hz; +, CH), 79.4, 51.5 (+, CH), 51.3 (t, *J* = 2.3 Hz, –, CH<sub>2</sub>), 48.2 (+, CH), 23.1 (+, CH<sub>3</sub>, 2C), 18.8 (+, CH<sub>3</sub>, 2C); <sup>19</sup>F NMR (376 MHz, CDCl<sub>3</sub>, ppm)  $\delta$  = -109.1; EI (m/z, 70 eV, 80 °C): 347 (10) [M+H]<sup>+</sup>, 346 (52) [M]<sup>+</sup>, 246 (29), 181 (19), 131 (29), 127 (51), 119 (10), 100 (33), 69 (100), 58 (22). HRMS (C<sub>17</sub>H<sub>20</sub>N<sub>6</sub>F<sub>2</sub>): Calcd 346.1718, Found 346.1716; IR (ATR,  $\tilde{\nu}$ ) = 3129 (vw), 3074 (vw), 3055 (vw), 2985 (w), 2948 (w), 2878 (vw), 2218 (s), 1822 (vw), 1737 (vw), 1711 (vw), 1660 (vw), 1625 (m), 1599 (s), 1536 (m), 1493 (w), 1466 (m), 1446 (m), 1424 (vs), 1392 (w), 1366 (vs), 1349 (vs), 1315 (s), 1293 (w), 1271 (s), 1242 (s), 1221 (vs), 1205 (s), 1174 (m), 1164 (m), 1136 (m), 1122 (vs), 1101 (vs), 1043 (w), 1028 (vs), 990 (s), 935 (s), 911 (m), 884 (w), 873 (m), 858 (vs), 847 (vs), 773 (s), 734 (w), 713 (s), 697 (m), 663 (m), 632 (s), 606 (m) cm<sup>-1</sup>.

Additional information on the chemical synthesis is available *via* Chemotion repository:

<https://doi.org/10.14272/reaction/SA-FUHFF-UHFFFADPSC-RPEOLKMCSJ-UHFFFADPSC-NUHFF-NJTWA-NUHFF-ZZZ>

Additional information on the analysis of the target compound is available *via* Chemotion repository:

<https://doi.org/10.14272/WSQPCVJPBSUDNZ-XTQSDGFTSA-N.1>

<https://doi.org/10.14272/ZFEWCQZPKGQXCJ-GHVJWSGMSA-N.1>

**(E)-3-(3,3-Diisopropyltriaz-1-en-1-yl)-1-ethyl-1H-pyrazole-4-carbonitrile (12d), (E)-5-(3,3-diisopropyltriaz-1-en-1-yl)-1-ethyl-1H-pyrazole-4-carbonitrile (13d)**

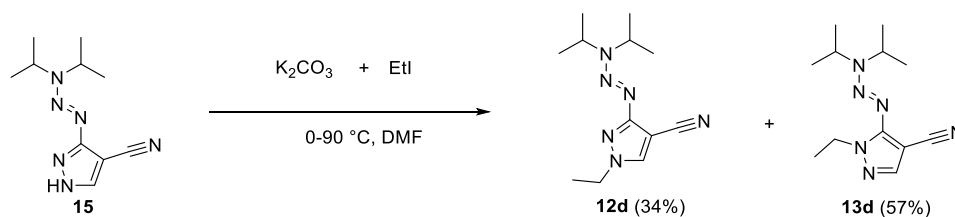

To a solution of 5-[(E)-[di(propan-2-yl)amino]diaz-enyl]-1H-pyrazole-4-carbonitrile (**15**, 301 mg, 1.36 mmol, 1.00 equiv) in 8 mL of anhydrous *N,N*-dimethylformamide, potassium carbonate (226 mg, 1.63 mmol, 1.20 equiv) was added at 0 °C and the resulting mixture was stirred at 0 °C for 45 minutes. Iodoethane (255 mg, 131  $\mu$ L, 1.63 mmol, 1.20 equiv) was slowly added over 15 minutes and the reaction mixture was heated to 90 °C for 14 hours. The resulting mixture was cooled, poured over ice and the aqueous phase was extracted with EtOAc (3  $\times$  15 mL). The combined organic layers were dried over Na<sub>2</sub>SO<sub>4</sub>, filtered and the solvent was removed under reduced pressure to give the crude product. The obtained crude product was purified *via* flash-chromatography on silica gel using cyclohexane/ethyl acetate 10:1 to 2:1, giving (E)-5-(3,3-diisopropyltriaz-1-en-1-yl)-1-ethyl-1H-pyrazole-4-carbonitrile (**12d**, 194 mg, 780  $\mu$ mol, 57% yield) as a slightly grey solid and (E)-3-(3,3-diisopropyltriaz-1-en-1-yl)-1-ethyl-1H-pyrazole-4-carbonitrile (**13d**, 117 mg, 470  $\mu$ mol, 34% yield) as a slightly grey solid.

**12d:** (E)-3-(3,3-diisopropyltriaz-1-en-1-yl)-1-ethyl-1H-pyrazole-4-carbonitrile; Formula: C<sub>12</sub>H<sub>20</sub>N<sub>6</sub>; Exact Mass: 248.1749; Smiles: N#Cc1cn(nc1/N=N/N(C(C)C)C(C)C)CC; InChIKey: IOAQHBXBAXJG-JQJEIRASA-N

*R<sub>f</sub>* = 0.49 (cyclohexane/ethyl acetate 2:1). <sup>1</sup>H NMR (400 MHz, CDCl<sub>3</sub>, ppm)  $\delta$  = 7.66 (s, 1H), 5.38 (hept, *J* = 6.8 Hz, 1H), 4.09 (q, *J* = 7.3 Hz, 2H), 4.00 (hept, *J* = 6.7 Hz, 1H), 1.48 (t, *J* = 7.3 Hz, 3H), 1.42 (d, *J* = 6.6 Hz, 6H), 1.21 (d, *J* = 6.8 Hz, 6H); <sup>13</sup>C NMR (100 MHz, CDCl<sub>3</sub>, ppm)  $\delta$  = 162.8, 134.9 (+, CH), 115.4, 80.6, 49.8 (+, CH), 47.9 (–, CH<sub>2</sub>), 46.4 (+, CH), 23.3 (+, CH<sub>3</sub>, 2C), 19.2 (+, CH<sub>3</sub>, 2C), 15.1 (+, CH<sub>3</sub>); MS (FAB, Matrix: 3-NBA): *m/z* (%) = 250 (17) [M+2H]<sup>+</sup>, 249 (100) [M+H]<sup>+</sup>, 248 (15) [M]<sup>+</sup>, 148 (53), 147 (23), 137 (12), 136 (10), 123 (11), 111 (20), 109 (22), 100 (28), 99 (10), 97 (39), 95 (32), 93 (10), 85 (25). HRMS–FAB (*m/z*): [M+H]<sup>+</sup> Calcd for C<sub>12</sub>H<sub>21</sub>N<sub>6</sub> 249.1822; Found 249.1823; IR (ATR,  $\tilde{\nu}$ ) = 3125 (vw), 3061 (vw), 2975 (m), 2935 (w), 2873 (w), 2220 (m), 2169 (vw), 1650 (vw), 1537 (s), 1455 (m), 1412 (vs), 1377 (s), 1366 (vs), 1349 (s), 1322 (w), 1261 (vs), 1225 (vs), 1186 (w), 1153 (vs), 1132 (m), 1102 (s), 1082 (w), 1033 (s), 1013 (w), 958 (w), 908 (w), 884 (w), 839 (m), 819 (m), 802 (w), 771 (vw), 718 (m), 690 (w), 629 (m) cm<sup>–1</sup>.

**13d:** (E)-5-(3,3-diisopropyltriaz-1-en-1-yl)-1-ethyl-1H-pyrazole-4-carbonitrile; Formula: C<sub>12</sub>H<sub>20</sub>N<sub>6</sub>; Exact Mass: 248.1749; Smiles: N#Cc1cnn(c1/N=N/N(C(C)C)C(C)C)CC; InChIKey: ZTYVCHQAFNRURB-FOCLMDBBSA-N

*R<sub>f</sub>* = 0.71 (cyclohexane/ethyl acetate 2:1). <sup>1</sup>H NMR (400 MHz, CDCl<sub>3</sub>, ppm)  $\delta$  = 7.61 (s, 1H), 5.18 (hept, *J* = 6.9 Hz, 1H), 4.23 (q, *J* = 7.3 Hz, 2H), 4.09 (hept, *J* = 6.6 Hz, 1H), 1.45 (d, *J* = 6.6 Hz, 6H), 1.41 (t, *J* = 7.3 Hz, 3H), 1.30 (d, *J* = 6.9 Hz, 6H); <sup>13</sup>C NMR (100 MHz, CDCl<sub>3</sub>, ppm)  $\delta$  = 154.2, 142.0 (+, CH), 116.1, 77.7, 51.3 (+, CH), 47.9 (+, CH), 43.7 (–, CH<sub>2</sub>), 23.2 (+, CH<sub>3</sub>, 2C), 19.0 (+, CH<sub>3</sub>, 2C), 15.0 (+, CH<sub>3</sub>); MS (FAB, Matrix: 3-NBA): *m/z* (%) = 250 (15) [M+2H]<sup>+</sup>, 249 (100) [M+H]<sup>+</sup>, 248 (45) [M]<sup>+</sup>, 148 (13). HRMS–FAB (*m/z*): [M+H]<sup>+</sup> Calcd for C<sub>12</sub>H<sub>21</sub>N<sub>6</sub> 249.1822; Found 249.1825; IR (ATR,  $\tilde{\nu}$ ) = 3111 (vw), 2978 (w), 2938 (w), 2874 (w), 2221 (s), 2172 (vw), 1758 (vw), 1536 (w), 1497 (w), 1470 (w), 1462 (w), 1422 (vs), 1392 (vs), 1378 (vs), 1367 (vs), 1319 (m), 1272 (s), 1251 (m), 1220 (s), 1196 (m), 1179 (m), 1162 (m), 1135 (m), 1109 (s), 1098 (s), 1086 (m), 1028 (w), 1010 (s), 958 (m), 909 (w), 882 (s), 846 (w), 793 (vw), 735 (vw), 722 (w), 711 (m), 674 (vw), 652 (w), 623 (vw), 606 (w), 577 (w), 550 (w), 531 (m), 518 (w), 431 (vw), 408 (vw), 384 (vw) cm<sup>–1</sup>.

Additional information on the chemical synthesis is available *via* Chemotion repository:

<https://doi.org/10.14272/reaction/SA-FUHFF-UHFFFADPSC-PTHGCHFVSU-UHFFFADPSC-NUHFF-NXOJS-NUHFF-ZZZ>

Additional information on the analysis of the target compound is available *via* Chemotion repository:

<https://doi.org/10.14272/IOAQHBXBAXJG-JQJEIRASA-N.1>

<https://doi.org/10.14272/ZTYVCHQAFNRURB-FOCLMDBBSA-N.1>



**(E)-1-Cyclopentyl-3-(3,3-diisopropyltriaz-1-en-1-yl)-1H-pyrazole-4-carbonitrile (12e), (E)-1-cyclopentyl-5-(3,3-diisopropyltriaz-1-en-1-yl)-1H-pyrazole-4-carbonitrile (13e)**

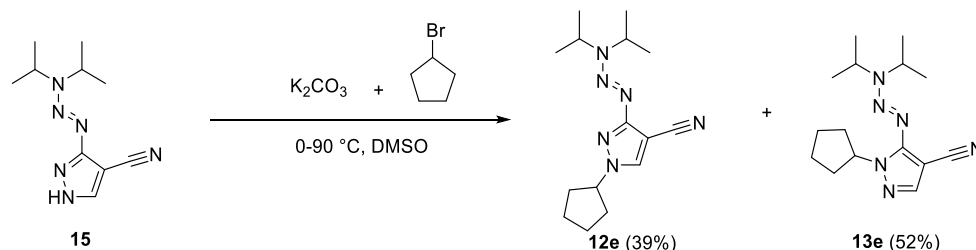

To a solution of 5-[[di(propan-2-yl)amino]diazenyl]-1H-pyrazole-4-carbonitrile (**15**, 306 mg, 1.39 mmol, 1.00 equiv) in 15 mL of anhydrous *N,N*-dimethylformamide, potassium carbonate (231 mg, 1.67 mmol, 1.20 equiv) was added at 0 °C and the resulting mixture was stirred at 0 °C for 45 minutes. Bromocyclopentane (249 mg, 179  $\mu\text{L}$ , 1.67 mmol, 1.20 equiv) was slowly added over 15 minutes and the reaction mixture was heated to 90 °C for 14 hours. The resulting mixture was cooled, poured over ice and the aqueous phase was extracted with EtOAc (3  $\times$  25 mL). The combined organic layers were dried over  $\text{Na}_2\text{SO}_4$ , filtered and the solvent was removed under reduced pressure to give the crude product. The obtained crude product was purified *via* flash-chromatography on silica gel using cyclohexane/ethyl acetate 10:1 to 4:1, giving 1-cyclopentyl-3-(3,3-diisopropyltriaz-1-en-1-yl)-1H-pyrazole-4-carbonitrile (**12e**, 157 mg, 544  $\mu\text{mol}$ , 39% yield) as a colorless solid and 1-cyclopentyl-5-(3,3-diisopropyltriaz-1-en-1-yl)-1H-pyrazole-4-carbonitrile (**13e**, 207 mg, 718  $\mu\text{mol}$ , 52% yield) as a colorless solid.

**12e:** (E)-1-cyclopentyl-3-(3,3-diisopropyltriaz-1-en-1-yl)-1H-pyrazole-4-carbonitrile; Formula:  $\text{C}_{15}\text{H}_{24}\text{N}_6$ ; Exact Mass: 288.2062; Smiles: CC(N(C(C)C)/N=N/c1nn(cc1C#N)C1CCCC1)C; InChIKey: VHDGMVPZVVGIBB-HTXNQAPBSA-N

$R_f$  = 0.18 (cyclohexane/ethyl acetate 4:1).  $^1\text{H}$  NMR (400 MHz,  $\text{CDCl}_3$ , ppm)  $\delta$  = 7.69 (s, 1H), 5.46 (hept,  $J$  = 6.5 Hz, 1H), 4.54 (p,  $J$  = 7.1 Hz, 1H), 4.00 (hept,  $J$  = 6.7 Hz, 1H), 2.20–1.98 (m, 4H), 1.94–1.77 (m, 2H), 1.77–1.60 (m, 2H), 1.44 (d,  $J$  = 6.6 Hz, 6H), 1.22 (d,  $J$  = 6.9 Hz, 6H);  $^{13}\text{C}$  NMR (100 MHz,  $\text{CDCl}_3$ , ppm)  $\delta$  = 162.8, 134.3 (+, CH), 115.7, 80.3, 64.0 (+, CH), 49.7 (+, CH), 46.2 (+, CH), 32.7 (–,  $\text{CH}_2$ , 2C), 24.2 (–,  $\text{CH}_2$ , 2C), 23.4 (+,  $\text{CH}_3$ , 2C), 19.4 (+,  $\text{CH}_3$ , 2C); MS (FAB, Matrix: 3-NBA):  $m/z$  (%) = 290 (20)  $[\text{M}+2\text{H}]^+$ , 289 (100)  $[\text{M}+\text{H}]^+$ , 288 (14)  $[\text{M}]^+$ , 287 (12)  $[\text{M}-\text{H}]^+$ , 221 (12), 188 (65), 147 (32), 136 (11), 123 (10), 120 (19), 111 (14), 109 (21), 107 (10), 100 (52), 97 (28), 95 (25), 86 (10), 85 (35). HRMS–FAB ( $m/z$ ):  $[\text{M}+\text{H}]^+$  Calcd for  $\text{C}_{15}\text{H}_{25}\text{N}_6$ , 289.2135; Found 289.2133; IR (ATR,  $\tilde{\nu}$ ) = 3128 (vw), 2975 (m), 2938 (w), 2873 (w), 2224 (s), 2169 (vw), 1541 (m), 1459 (w), 1451 (w), 1402 (vs), 1381 (vs), 1366 (vs), 1315 (w), 1258 (vs), 1227 (vs), 1187 (w), 1157 (vs), 1129 (s), 1101 (s), 1028 (m), 1000 (w), 942 (vw), 909 (w), 882 (w), 823 (m), 720 (m), 690 (vw), 637 (w)  $\text{cm}^{-1}$ .

**13e:** (E)-1-cyclopentyl-5-(3,3-diisopropyltriaz-1-en-1-yl)-1H-pyrazole-4-carbonitrile; Formula:  $\text{C}_{15}\text{H}_{24}\text{N}_6$ ; Exact Mass: 288.2062; Smiles: CC(N(C(C)C)/N=N/c1ncc(C#N)nn1)C1CCCC1; InChIKey: OPJIUORDWAXUPI-VHEBQXMUSA-N

$R_f$  = 0.33 (cyclohexane/ethyl acetate 4:1).  $^1\text{H}$  NMR (400 MHz,  $\text{CDCl}_3$ , ppm)  $\delta$  = 7.61 (s, 1H), 5.19 (hept,  $J$  = 6.8 Hz, 1H), 5.01 (p,  $J$  = 7.6 Hz, 1H), 4.08 (hept,  $J$  = 6.8 Hz, 1H), 2.11–1.98 (m, 4H), 1.98–1.83 (m, 2H), 1.73–1.58 (m, 2H), 1.45 (d,  $J$  = 6.7 Hz, 6H), 1.29 (d,  $J$  = 6.8 Hz, 6H);  $^{13}\text{C}$  NMR (100 MHz,  $\text{CDCl}_3$ , ppm)  $\delta$  = 154.4, 141.8 (+, CH), 116.3, 77.6, 58.6 (+, CH), 51.2 (+, CH), 47.8 (+, CH), 32.4 (–,  $\text{CH}_2$ , 2C), 24.9 (–,  $\text{CH}_2$ , 2C), 23.2 (+,  $\text{CH}_3$ , 2C), 19.1 (+,  $\text{CH}_3$ , 2C); MS (FAB, Matrix: 3-NBA):  $m/z$  (%) = 290 (20)  $[\text{M}+2\text{H}]^+$ , 289 (100)  $[\text{M}+\text{H}]^+$ , 288 (43)  $[\text{M}]^+$ , 188 (10), 154 (13), 136 (10), 120 (10), 100 (11). HRMS–FAB ( $m/z$ ):  $[\text{M}+\text{H}]^+$  Calcd for  $\text{C}_{15}\text{H}_{25}\text{N}_6$ , 289.2135; Found 289.2133; IR (ATR,  $\tilde{\nu}$ ) = 3101 (vw), 2970 (w), 2935 (w), 2870 (w), 2218 (s), 2166 (vw), 1747 (vw), 1531 (m), 1480 (w), 1470 (m), 1445 (w), 1418 (s), 1394 (vs), 1378 (s), 1358 (vs), 1322 (w), 1269 (vs), 1222 (s), 1197 (m), 1171 (m), 1160 (m), 1130 (m), 1098 (s), 1031 (w), 1013 (s), 931 (w), 907 (w), 875 (m), 846 (w), 734 (vw), 711 (w), 652 (w), 608 (vw)  $\text{cm}^{-1}$ .

Additional information on the chemical synthesis is available *via* Chemotion repository:

<https://doi.org/10.14272/reaction/SA-FUHFF-UHFFFADPSC-CCXXYIBWZN-UHFFFADPSC-NUHFF-NCWUQ-NUHFF-ZZZ>

Additional information on the analysis of the target compound is available *via* Chemotion repository:

<https://doi.org/10.14272/VHDGMVPZVVGIBB-HTXNQAPBSA-N.1>

<https://doi.org/10.14272/OPJIUORDWAXUPI-VHEBQXMUSA-N.1>

**(E)-3-(3,3-Diisopropyltriaz-1-en-1-yl)-1-isobutyl-1H-pyrazole-4-carbonitrile (12f), (E)-5-(3,3-diisopropyltriaz-1-en-1-yl)-1-isobutyl-1H-pyrazole-4-carbonitrile (13f)**

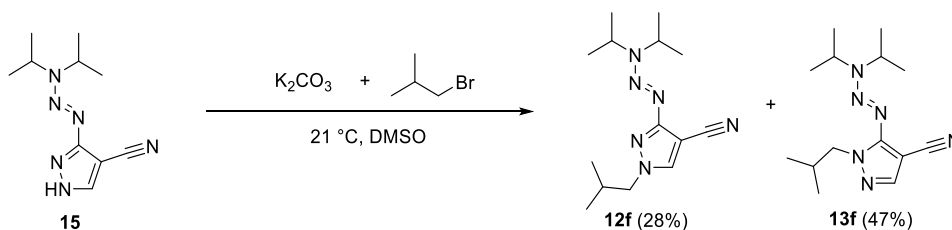

To a stirred suspension of 5-[(E)-[di(propan-2-yl)amino]diazenyl]-1H-pyrazole-4-carbonitrile (**15**, 507 mg, 2.30 mmol, 1.00 equiv) and potassium carbonate (314 mg, 2.27 mmol, 0.986 equiv) in 5 mL of *N,N*-dimethylformamide, 1-bromo-2-methylpropane (366 mg, 291  $\mu$ L, 2.67 mmol, 1.16 equiv) was added dropwise within 10 min at 21 °C. The reaction mixture was stirred at 21 °C for 14 hours. The reaction was quenched in ice-cold water and extracted with ethyl acetate (3  $\times$  5 mL). The combined organic layers were dried over sodium sulfate and concentrated in vacuo to give the crude product.

The obtained crude product was purified *via* flash-chromatography on silica gel using cyclohexane/ethyl acetate 20:1 to 4:1, giving 3-(3,3-diisopropyltriaz-1-en-1-yl)-1-isobutyl-1H-pyrazole-4-carbonitrile (**12f**, 177 mg, 640  $\mu$ mol, 28% yield) as a light-yellow solid and 5-(3,3-diisopropyltriaz-1-en-1-yl)-1-isobutyl-1H-pyrazole-4-carbonitrile (**13f**, 299 mg, 1.08 mmol, 47% yield) as a transparent yellow solid.

**12f:** (E)-3-(3,3-diisopropyltriaz-1-en-1-yl)-1-isobutyl-1H-pyrazole-4-carbonitrile; Formula: C<sub>14</sub>H<sub>24</sub>N<sub>6</sub>; Exact Mass: 276.2062; Smiles: N#Cc1cn(cnc1/N=N/N(C(C)C)C(C)C)CC(C)C; InChIKey: GSWCLGSPFBAJHR-FBMGVBCBSA-N

*R<sub>f</sub>* = 0.34 (cyclohexane/ethyl acetate 4:1). <sup>1</sup>H NMR (400 MHz, CDCl<sub>3</sub>, ppm)  $\delta$  = 7.62 (s, 1H), 5.40 (hept, *J* = 6.6 Hz, 1H), 4.01 (hept, *J* = 6.8 Hz, 1H), 3.81 (d, *J* = 7.3 Hz, 2H), 2.27 (hept, *J* = 6.9 Hz, 1H), 1.43 (d, *J* = 6.6 Hz, 6H), 1.22 (d, *J* = 6.8 Hz, 6H), 0.91 (d, *J* = 6.7 Hz, 6H); <sup>13</sup>C NMR (100 MHz, CDCl<sub>3</sub>, ppm)  $\delta$  = 162.9, 136.0 (+, CH), 115.5, 80.4, 60.6 (–, CH<sub>2</sub>), 49.8 (+, CH), 46.4 (+, CH), 29.1 (+, CH), 23.3 (+, CH<sub>3</sub>, 2C), 19.9 (+, CH<sub>3</sub>, 2C), 19.3 (+, CH<sub>3</sub>, 2C); MS (FAB, Matrix: 3-NBA): *m/z* (%) = 278 (18) [M+2H]<sup>+</sup>, 277 (100) [M+H]<sup>+</sup>, 276 (17) [M]<sup>+</sup>, 176 (50), 109 (15), 107 (11), 100 (31), 97 (15), 95 (25), 93 (16), 91 (14). HRMS–FAB (*m/z*): [M+H]<sup>+</sup> Calcd for C<sub>14</sub>H<sub>25</sub>N<sub>6</sub> 277.2141; Found 277.2139; IR (ATR,  $\tilde{\nu}$ ) = 3123 (vw), 3064 (vw), 2972 (w), 2956 (w), 2934 (w), 2871 (w), 2225 (s), 1544 (s), 1460 (m), 1445 (w), 1405 (vs), 1387 (vs), 1370 (vs), 1357 (vs), 1296 (w), 1258 (vs), 1227 (s), 1215 (m), 1157 (vs), 1130 (m), 1115 (w), 1101 (s), 1031 (m), 1009 (m), 948 (w), 926 (w), 909 (w), 894 (w), 881 (w), 858 (m), 844 (w), 819 (w), 796 (w), 724 (m), 711 (w), 630 (m) cm<sup>–1</sup>.

**13f:** (E)-5-(3,3-diisopropyltriaz-1-en-1-yl)-1-isobutyl-1H-pyrazole-4-carbonitrile; Formula: C<sub>14</sub>H<sub>24</sub>N<sub>6</sub>; Exact Mass: 276.2062; Smiles: N#Cc1cnn(c1/N=N/N(C(C)C)C(C)C)CC(C)C; InChIKey: MWOHIDYQOPZPNH-ISLYRVAYSAN

*R<sub>f</sub>* = 0.62 (cyclohexane/ethyl acetate 4:1). <sup>1</sup>H NMR (400 MHz, CDCl<sub>3</sub>, ppm)  $\delta$  = 7.62 (s, 1H), 5.12 (hept, *J* = 6.8 Hz, 1H), 4.09 (hept, *J* = 6.6 Hz, 1H), 3.98 (d, *J* = 7.2 Hz, 2H), 2.22 (hept, *J* = 6.8 Hz, 1H), 1.45 (d, *J* = 6.6 Hz, 6H), 1.29 (d, *J* = 6.8 Hz, 6H), 0.90 (d, *J* = 6.7 Hz, 6H); <sup>13</sup>C NMR (100 MHz, CDCl<sub>3</sub>, ppm)  $\delta$  = 154.9, 141.9 (+, CH), 116.1, 77.4, 55.6 (–, CH<sub>2</sub>), 51.4 (+, CH), 48.1 (+, CH), 29.3 (+, CH), 23.2 (+, CH<sub>3</sub>, 2C), 20.1 (+, CH<sub>3</sub>, 2C), 19.0 (+, CH<sub>3</sub>, 2C); MS (FAB, Matrix: 3-NBA): *m/z* (%) = 278 (17) [M+2H]<sup>+</sup>, 277 (100) [M+H]<sup>+</sup>, 276 (29) [M]<sup>+</sup>, 176 (16), 100 (12), 95 (12). HRMS–FAB (*m/z*): [M+H]<sup>+</sup> Calcd for C<sub>14</sub>H<sub>25</sub>N<sub>6</sub>, 277.2141; Found 277.2142; IR (ATR,  $\tilde{\nu}$ ) = 3112 (vw), 2968 (m), 2955 (m), 2946 (m), 2925 (m), 2868 (w), 2853 (w), 2217 (s), 2163 (vw), 1738 (vw), 1690 (vw), 1533 (s), 1490 (w), 1468 (m), 1446 (w), 1435 (m), 1417 (vs), 1397 (vs), 1383 (vs), 1357 (vs), 1322 (m), 1271 (vs), 1241 (vs), 1220 (vs), 1173 (s), 1162 (s), 1130 (s), 1111 (s), 1098 (s), 1034 (m), 1014 (vs), 946 (m), 926 (w), 908 (m), 892 (w), 882 (w), 873 (m), 847 (m), 823 (w), 775 (m), 727 (w), 708 (m), 654 (w), 628 (w), 620 (w) cm<sup>–1</sup>.

Additional information on the chemical synthesis is available *via* Chemotion repository:

<https://doi.org/10.14272/reaction/SA-FUHFF-UHFFFADPSC-NZDLOEMQHU-UHFFFADPSC-NUHFF-NXEFH-NUHFF-ZZZ>

Additional information on the analysis of the target compound is available *via* Chemotion repository:

<https://doi.org/10.14272/GSWCLGSPFBAJHR-FBMGVBCBSA-N.1>

<https://doi.org/10.14272/MWOHIDYQOPZPNH-ISLYRVAYSAN.1>

**Ethyl (E)-2-(4-cyano-3-(3,3-diisopropyltriaz-1-en-1-yl)-1H-pyrazol-1-yl)acetate (12g), ethyl (E)-2-(4-cyano-5-(3,3-diisopropyltriaz-1-en-1-yl)-1H-pyrazol-1-yl)acetate (13g)**

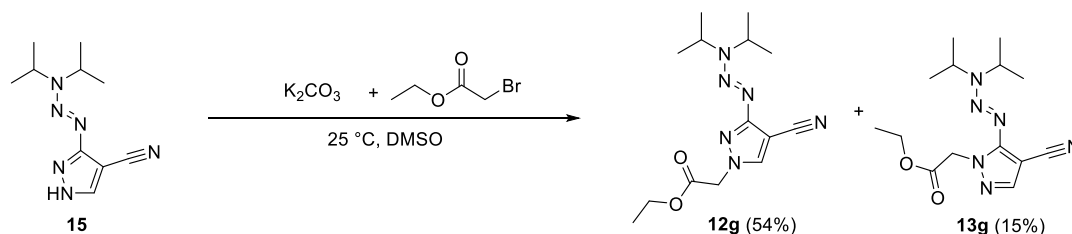

To a stirred suspension of 5-[(E)-[di(propan-2-yl)amino]diazene]-1H-pyrazole-4-carbonitrile (**15**, 529 mg, 2.40 mmol, 1.00 equiv) and potassium carbonate (314 mg, 2.27 mmol, 0.946 equiv) in 10 mL of *N,N*-dimethylformamide, ethyl 2-bromoacetate (447 mg, 297  $\mu$ L, 2.67 mmol, 1.11 equiv) was added dropwise within 10 min at 21 °C. The reaction mixture was stirred at 21 °C for 14 hours. The reaction was quenched in ice-cold water and extracted with ethyl acetate (3  $\times$  10 mL). The combined organic layers were dried over sodium sulfate and concentrated under vacuo to give the crude product. The obtained crude product was purified *via* flash-chromatography on silica gel using cyclohexane/ethyl acetate 10:0 to 4:1, giving ethyl 2-(4-cyano-3-(3,3-diisopropyltriaz-1-en-1-yl)-1H-pyrazol-1-yl)acetate (**12g**, 397 mg, 1.30 mmol, 54% yield) as a colorless solid and ethyl 2-(4-cyano-5-(3,3-diisopropyltriaz-1-en-1-yl)-1H-pyrazol-1-yl)acetate (**13g**, 109 mg, 356  $\mu$ mol, 15% yield) as a colorless solid.

**12g:** ethyl (E)-2-(4-cyano-3-(3,3-diisopropyltriaz-1-en-1-yl)-1H-pyrazol-1-yl)acetate; Formula:  $C_{14}H_{22}N_6O_2$ ; Exact Mass: 306.1804; Smiles: CCOC(=O)Cn1nc(c(c1)C#N)/N=N/N(C(C)C)C(C)C; InChIKey: GMSYXQOQYOUAHU-FBMGVBCBSA-N

$R_f$  = 0.16 (cyclohexane/ethyl acetate 4:1).  $^1H$  NMR (400 MHz,  $CDCl_3$ , ppm)  $\delta$  = 7.80 (s, 1H), 5.37 (hept,  $J$  = 6.8 Hz, 1H), 4.82 (s, 2H), 4.24 (q,  $J$  = 7.2 Hz, 2H), 4.03 (hept,  $J$  = 6.6 Hz, 1H), 1.44 (d,  $J$  = 6.6 Hz, 6H), 1.28 (t,  $J$  = 7.1 Hz, 3H), 1.23 (d,  $J$  = 6.9 Hz, 6H).  $^{13}C$  NMR (100 MHz,  $CDCl_3$ , ppm)  $\delta$  = 166.8, 163.0, 137.5 (+, CH), 115.0, 82.5, 62.4 (–,  $CH_2$ ), 53.6 (–,  $CH_2$ ), 50.0 (+, CH), 46.7 (+, CH), 23.3 (+,  $CH_3$ , 2C), 19.3 (+,  $CH_3$ , 2C), 14.2 (+,  $CH_3$ ); MS (FAB, Matrix: 3-NBA):  $m/z$  (%) = 308 (17)  $[M+2H]^+$ , 307 (100)  $[M+H]^+$ , 306 (10)  $[M]^+$ , 305 (11), 207 (13), 206 (76), 154 (14), 147 (12), 136 (20), 135 (11), 133 (10), 131 (11), 123 (19), 121 (33), 119 (16), 117 (11), 111 (23), 109 (38), 107 (26), 106 (17), 105 (24), 100 (42), 97 (43), 95 (70), 94 (10), 93 (34), 91 (40), 86 (10). HRMS–FAB ( $m/z$ ):  $[M+H]^+$  Calcd for  $C_{14}H_{23}O_2N_6$ , 307.1882; Found 307.1882; IR (ATR,  $\tilde{\nu}$ ) = 3132 (vw), 3071 (vw), 2976 (w), 2936 (w), 2874 (vw), 2227 (m), 1748 (vs), 1544 (s), 1465 (m), 1409 (vs), 1368 (vs), 1356 (vs), 1299 (w), 1261 (vs), 1208 (vs), 1157 (vs), 1130 (s), 1099 (s), 1031 (s), 1006 (s), 970 (w), 909 (m), 874 (m), 843 (m), 805 (w), 718 (s), 697 (m), 639 (m), 620 (w)  $cm^{-1}$ .

**13g:** ethyl (E)-2-(4-cyano-5-(3,3-diisopropyltriaz-1-en-1-yl)-1H-pyrazol-1-yl)acetate; Formula:  $C_{14}H_{22}N_6O_2$ ; Exact Mass: 306.1804; Smiles: CCOC(=O)Cn1ncc(c1/N=N/N(C(C)C)C(C)C)C#N; InChIKey: UVXRQPKXJULFTR-ISLYRVAYSA-N

$R_f$  = 0.26 (cyclohexane/ethyl acetate 4:1).  $^1H$  NMR (400 MHz,  $CDCl_3$ , ppm)  $\delta$  = 7.67 (s, 1H), 5.10 (hept,  $J$  = 6.8 Hz, 1H), 4.94 (s, 2H), 4.21 (q,  $J$  = 7.1 Hz, 2H), 4.10 (hept,  $J$  = 6.6 Hz, 1H), 1.45 (d,  $J$  = 6.6 Hz, 6H), 1.30–1.21 (m, 9H);  $^{13}C$  NMR (100 MHz,  $CDCl_3$ , ppm)  $\delta$  = 167.5, 155.4, 142.6 (+, CH), 115.6, 78.1, 61.9 (–,  $CH_2$ ), 51.7 (+, CH), 50.0 (–,  $CH_2$ ), 48.3 (+, CH), 23.2 (+,  $CH_3$ , 2C), 18.9 (+,  $CH_3$ , 2C), 14.3 (+,  $CH_3$ ); MS (FAB, Matrix: 3-NBA):  $m/z$  (%) = 308 (18)  $[M+2H]^+$ , 307 (100)  $[M+H]^+$ , 306 (23)  $[M]^+$ , 206 (10). HRMS–FAB ( $m/z$ ):  $[M+H]^+$  Calcd for  $C_{14}H_{23}O_2N_6$ , 307.1882; Found 307.1881; IR (ATR,  $\tilde{\nu}$ ) = 2982 (w), 2941 (w), 2878 (vw), 2220 (s), 1735 (vs), 1538 (m), 1502 (w), 1473 (w), 1465 (w), 1426 (vs), 1418 (vs), 1391 (vs), 1375 (s), 1363 (vs), 1341 (s), 1313 (w), 1293 (m), 1278 (vs), 1255 (vs), 1242 (vs), 1211 (vs), 1191 (m), 1177 (w), 1163 (s), 1142 (m), 1135 (m), 1102 (vs), 1051 (m), 1030 (vs), 1021 (vs), 945 (w), 911 (m), 884 (w), 867 (w), 858 (m), 850 (m), 805 (w), 779 (m), 730 (w), 711 (m), 646 (m), 626 (w)  $cm^{-1}$ .

Additional information on the chemical synthesis is available *via* Chemotion repository:

<https://doi.org/10.14272/reaction/SA-FUHFF-UHFFFADPSC-HLSFJQKZZG-UHFFFADPSC-NUHFF-NQFOL-NUHFF-ZZZ>

Additional information on the analysis of the target compound is available *via* Chemotion repository:

<https://doi.org/10.14272/GMSYXQOQYOUAHU-FBMGVBCBSA-N.1>

<https://doi.org/10.14272/UVXRQPKXJULFTR-ISLYRVAYSA-N.1>

**(E)-1-(4-Bromobenzyl)-3-(3,3-diisopropyltriaz-1-en-1-yl)-1H-pyrazole-4-carbonitrile (12h), (E)-1-(4-bromobenzyl)-5-(3,3-diisopropyltriaz-1-en-1-yl)-1H-pyrazole-4-carbonitrile (13h)**

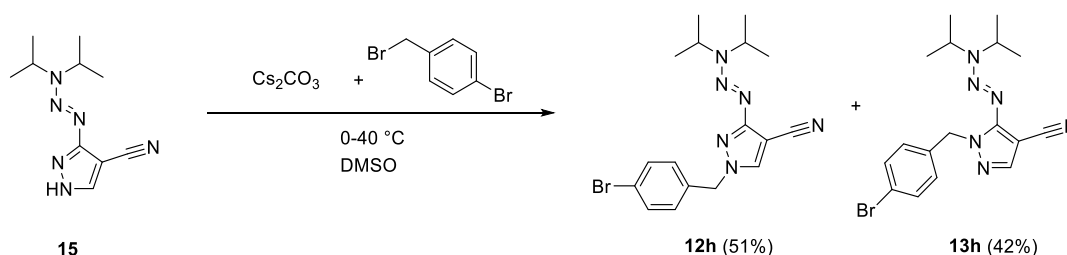

In a vial, 5-(*E*)-[di(propan-2-yl)amino]diaz-enyl)-1H-pyrazole-4-carbonitrile (**15**, 307 mg, 1.39 mmol, 1.00 equiv) was dissolved in 12 mL of DMSO. Cesium carbonate (532 mg, 1.63 mmol, 1.17 equiv) was added and the solution was cooled to 0 °C. 1-Bromo-4-(bromomethyl)benzene (681 mg, 2.72 mmol, 1.96 equiv) was added and the vial was closed and slowly warmed to 21 °C. The reaction mixture was stirred at 40 °C for 2 days. The reaction was quenched by addition of ice and was extracted with EtOAc (3 × 15 mL). The obtained organic layers were co-evaporated with Celite(R) to give the Celite-immobilized crude product. The obtained crude product was purified *via* flash-chromatography on silica gel using cyclohexane/ethyl acetate 10:1 to 41:1, giving (*E*)-1-(4-bromobenzyl)-3-(3,3-diisopropyltriaz-1-en-1-yl)-1H-pyrazole-4-carbonitrile (**12h**, 278 mg, 713 μmol) 51% yield and (*E*)-1-(4-bromobenzyl)-5-(3,3-diisopropyltriaz-1-en-1-yl)-1H-pyrazole-4-carbonitrile (**13h**, 227 mg, 582 μmol) in 42% yield.

**12h:** (E)-1-(4-bromobenzyl)-3-(3,3-diisopropyltriaz-1-en-1-yl)-1H-pyrazole-4-carbonitrile; Formula:  $\text{C}_{17}\text{H}_{21}\text{BrN}_6$ ; Exact Mass: 388.1011; Smiles: N#Cc1cn(nc1/N=N/N(C(C)C)C(C)C)Cc1ccc(cc1)Br; InChIKey: JVCZUZVUVDDSMML-LSDHQDQOSA-N

$R_f$  = 0.2 (cyclohexane/ethyl acetate 4:1).  $^1\text{H}$  NMR (400 MHz,  $\text{CDCl}_3$ , ppm)  $\delta$  = 7.67 (s, 1H), 7.48–7.38 (m, 2H), 7.17–7.09 (m, 2H), 5.42–5.28 (m, 1H), 5.14 (d,  $J$  = 3.1 Hz, 2H), 4.06–3.93 (m, 1H), 1.41 (dd,  $J$  = 6.7 Hz,  $J$  = 3.0 Hz, 6H), 1.20 (dd,  $J$  = 7.0 Hz,  $J$  = 3.5 Hz, 6H);  $^{13}\text{C}$  NMR (100 MHz,  $\text{CDCl}_3$ , ppm)  $\delta$  = 163.0, 135.8 (+, CH), 134.0, 132.1 (+, CH, 2C), 129.8 (+, CH, 2C), 122.7, 115.1, 81.6, 56.0 (–, CH<sub>2</sub>), 49.8 (+, CH), 46.5 (+, CH), 23.2 (+, CH<sub>3</sub>, 2C), 19.2 (+, CH<sub>3</sub>, 2C); MS (EI, 70 eV, 90 °C):  $m/z$  (%) = 490/388 (20/22) [ $\text{M}$ ]<sup>+</sup>, 297/295 (21/18), 290/288 (11/11), 208 (11), 181 (24), 171/169 (92/100), 149 (11), 131 (24), 116 (19), 100 (58), 97 (15), 91/89 (15/27), 90 (29), 85 (14), 84 (15), 83 (15), 71 (21), 70 (11), 69 (53), 58 (51), 57 (33), 55 (16). HRMS (EI,  $\text{C}_{17}\text{H}_{21}\text{N}_6^{79}\text{Br}$ ): Calcd 388.1011; Found 388.1010.

**13h:** (E)-1-(4-bromobenzyl)-5-(3,3-diisopropyltriaz-1-en-1-yl)-1H-pyrazole-4-carbonitrile; Formula:  $\text{C}_{17}\text{H}_{21}\text{BrN}_6$ ; Exact Mass: 388.1011; Smiles: N#Cc1cnn(c1/N=N/N(C(C)C)C(C)C)Cc1ccc(cc1)Br; InChIKey: HUNPOMLAEFCSWA-QURGRASLSA-N

$R_f$  = 0.31 (cyclohexane/ethyl acetate 4:1).  $^1\text{H}$  NMR (400 MHz,  $\text{CDCl}_3$ , ppm)  $\delta$  = 7.64 (s, 1H), 7.46–7.37 (m, 2H), 7.16–7.08 (m, 2H), 5.30 (s, 2H), 5.14 (sept,  $J$  = 6.8 Hz, 1H), 4.09 (sept,  $J$  = 6.6 Hz, 1H), 1.44 (d,  $J$  = 6.6 Hz, 6H), 1.26 (d,  $J$  = 6.8 Hz, 6H);  $^{13}\text{C}$  NMR (100 MHz,  $\text{CDCl}_3$ , ppm)  $\delta$  = 154.7, 142.4 (+, CH), 135.4, 131.8 (+, CH, 2C), 129.6 (+, CH, 2C), 121.9, 115.7, 77.9, 51.5 (–, CH<sub>2</sub>), 51.4 (+, CH), 48.2 (+, CH), 23.1 (+, CH<sub>3</sub>, 2C), 18.9 (+, CH<sub>3</sub>, 2C); MS (EI, 70 eV, 80 °C):  $m/z$  (%) = 390/388 (32/31) [ $\text{M}$ ]<sup>+</sup>, 338 (12), 290/288 (11/11), 231/229 (23/22), 187/185 (53/58), 181 (20), 172/170 (11/12), 171/169 (95/100), 131 (26), 100 (74), 91/89 (24/31), 90 (44), 84 (14), 78 (17), 77 (32), 71 (11), 69 (52), 58 (67), 57 (18), 55 (12). HRMS (EI,  $\text{C}_{17}\text{H}_{21}\text{N}_6^{79}\text{Br}$ ): Calcd 388.1011; Found 388.1010.

Additional information on the chemical synthesis is available *via* Chemotion repository:

<https://doi.org/10.14272/reaction/SA-FUHHF-UHFFFADPSC-CYZFVCDWYP-UHFFFADPSC-NUHFF-NPQQK-NUHFF-ZZZ>

Additional information on the analysis of the target compound is available *via* Chemotion repository:

<https://doi.org/10.14272/JVCZUZVUVDDSMML-LSDHQDQOSA-N.1>

<https://doi.org/10.14272/HUNPOMLAEFCSWA-QURGRASLSA-N.1>

**(E)-N-((1-Benzyl-3-(3,3-diisopropyltriaz-1-en-1-yl)-1H-pyrazol-4-yl)methyl)acetamide (9a)**

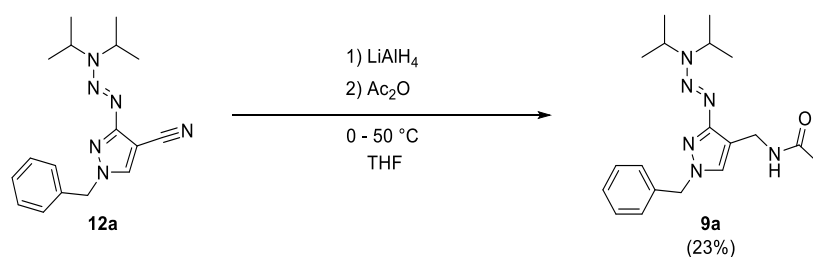

Step 1: (*E*)-1-Benzyl-3-(3,3-diisopropyltriaz-1-en-1-yl)-1*H*-pyrazole-4-carbonitrile (**12a**, 120 mg, 388 μmol, 1.00 equiv) was dissolved in 65 mL of dry THF under nitrogen atmosphere. The solution was cooled to 0 °C before lithium aluminum hydride (44.1 mg, 1.16 mL, 1.16 mmol, 3.00 equiv) was slowly added. The cooling was removed and the solution was stirred at 21 °C for 14 hours, then additional 5 hours at 50 °C. The solution was cooled to 21 °C and the reaction was quenched with a saturated K/Na-tartrate solution (70 mL). The organic solvent was removed under reduced pressure and the remaining aqueous phase was extracted with methylene chloride (3 × 70 mL). The combined organic layers were washed with brine (200 mL) and dried over Na<sub>2</sub>SO<sub>4</sub>. The solvent was removed under reduced pressure to give the crude (*E*)-(1-benzyl-3-(3,3-diisopropyltriaz-1-en-1-yl)-1*H*-pyrazol-4-yl)methanamine, which was used for the next step without further purification.

Step 2: The crude (*E*)-(1-benzyl-3-(3,3-diisopropyltriaz-1-en-1-yl)-1*H*-pyrazol-4-yl)methanamine was dissolved in 65 mL of dry THF under nitrogen atmosphere. The solution was cooled to 0 °C before acetic anhydride (59.3 mg, 55.0 μL, 581 μmol, 1.50 equiv) was added dropwise. The cooling was removed and the solution was stirred for 14 hours at 21 °C. The reaction was quenched with a saturated K<sub>2</sub>CO<sub>3</sub> solution (70 mL) and the organic solvent was removed under reduced pressure. The remaining aqueous phase was extracted with methylene chloride (3 × 70 mL). The combined organic layers were washed with brine (200 mL) and dried over Na<sub>2</sub>SO<sub>4</sub>. The solvent was removed under reduced pressure to give the crude product. The obtained crude product was purified *via* flash-chromatography on silica gel using methylene chloride/methanol 50:1 to 30:1. It was further purified *via* HPLC using MeCN/H<sub>2</sub>O 10:1, to give (*E*)-*N*-((1-benzyl-3-(3,3-diisopropyltriaz-1-en-1-yl)-1*H*-pyrazol-4-yl)methyl)acetamide (**9a**, 32.0 mg, 89.8 μmol, 23% yield) as a brown oil.

**9a:** (*E*)-*N*-((1-benzyl-3-(3,3-diisopropyltriaz-1-en-1-yl)-1*H*-pyrazol-4-yl)methyl)acetamide; Formula: C<sub>19</sub>H<sub>28</sub>N<sub>6</sub>O; Exact Mass: 356.2325; Smiles: CC(=O)NCc1cn(nc1/N=N/N(C(C)C)C(C)C)Cc1ccccc1; InChIKey: VXSZKPHEZACHZ-XTQSDGFTSA-N

*R*<sub>f</sub> = 0.06 (cyclohexane/ethyl acetate 2:1). <sup>1</sup>H NMR (400 MHz, CDCl<sub>3</sub>, ppm) δ = 7.40–7.31 (m, 5H), 7.20 (s, 1H), 5.91 (br.t, *J* = 5.5 Hz, 1H), 5.41 (br.s, 1H), 5.16 (s, 2H), 4.29 (d, *J* = 5.3 Hz, 2H), 3.98 (br.s, 1H), 1.88 (s, 3H), 1.32 (br.s, 6H), 1.20 (br.s, 6H); <sup>13</sup>C NMR (100 MHz, CDCl<sub>3</sub>, ppm) δ = 169.3, 158.0, 136.4, 130.2 (+, CH), 128.8 (+, CH, 2C), 128.1 (+, CH, 3C), 107.5, 56.2 (–, CH<sub>2</sub>), 48.3 (+, CH), 45.3 (+, CH), 34.4 (–, CH<sub>2</sub>), 23.7 (+, CH<sub>3</sub>, 2C), 23.5 (+, CH<sub>3</sub>), 19.4 (+, CH<sub>3</sub>, 2C); MS (FAB, Matrix: 3-NBA): *m/z* (%) = 358 (22) [M+2H]<sup>+</sup>, 357 (100) [M+H]<sup>+</sup>, 356 (21) [M]<sup>+</sup>, 355 (13) [M-H]<sup>+</sup>, 298 (31), 257 (12), 256 (79), 100 (13), 91 (60). HRMS–FAB (*m/z*): [M+H]<sup>+</sup> Calcd for C<sub>19</sub>H<sub>29</sub>ON<sub>6</sub>, 357.2403; Found 357.2402; IR (ATR,  $\tilde{\nu}$ ) = 3285 (w), 3080 (vw), 3065 (vw), 3033 (vw), 2973 (w), 2931 (w), 2871 (vw), 2230 (vw), 1650 (s), 1543 (m), 1497 (w), 1465 (m), 1455 (s), 1419 (vs), 1402 (vs), 1364 (vs), 1341 (s), 1244 (vs), 1224 (vs), 1150 (vs), 1128 (s), 1096 (m), 1033 (s), 1011 (m), 969 (w), 909 (m), 851 (w), 841 (w), 813 (w), 727 (vs), 704 (vs), 643 (m), 630 (w) cm<sup>–1</sup>.

Additional information on the chemical synthesis is available *via* Chemotion repository:

<https://doi.org/10.14272/reaction/SA-FUHFF-UHFFFADPSC-VXSZKPHEZ-UHFFFADPSC-NUHFF-NQYKM-NUHFF-ZZZ>

Additional information on the analysis of the target compound is available *via* Chemotion repository:

<https://doi.org/10.14272/VXSZKPHEZACHZ-XTQSDGFTSA-N.1>

**(E)-N-((1-Benzyl-3-(3,3-diisopropyltriaz-1-en-1-yl)-1H-pyrazol-4-yl)methyl)benzamide (9b)**

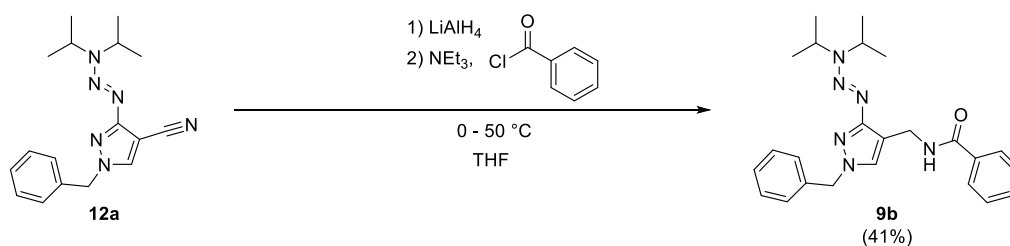

Step 1: 1-Benzyl-3-(3,3-diisopropyltriaz-1-en-1-yl)-1H-pyrazole-4-carbonitrile (**12a**, 202 mg, 650  $\mu$ mol, 1.00 equiv) was dissolved in 100 mL of dry THF under nitrogen atmosphere. The solution was cooled to 0 °C before lithium aluminum hydride (74.0 mg, 1.95 mL, 1.95 mmol, 3.00 equiv) was slowly added. The cooling was removed and the solution was stirred at 21 °C for 14 hours, then additional 5 hours at 50 °C. The solution was cooled to 21 °C and the reaction was quenched with a saturated K/Na-tartrate solution (100 mL). The organic solvent was removed under reduced pressure and the remaining aqueous phase was extracted with methylene chloride (3 x 100 mL). The combined organic layers were washed with brine (300 mL) and dried over Na<sub>2</sub>SO<sub>4</sub>. The solvent was removed under reduced pressure to give the crude (1-benzyl-3-(3,3-diisopropyltriaz-1-en-1-yl)-1H-pyrazol-4-yl)methanamine, which was used for the next step without further purification.

Step 2: The crude (1-benzyl-3-(3,3-diisopropyltriaz-1-en-1-yl)-1H-pyrazol-4-yl)methanamine was dissolved in 100 mL of dry THF under nitrogen atmosphere. Triethylamine (197 mg, 272  $\mu$ L, 1.95 mmol, 3.00 equiv) was added and the solution was cooled to 0 °C before benzoyl chloride (137 mg, 113  $\mu$ L, 975  $\mu$ mol, 1.50 equiv) was slowly added. The cooling was removed and the solution was stirred for 14 hours at 21 °C. The reaction was quenched with a saturated K<sub>2</sub>CO<sub>3</sub> solution (100 mL) and the organic solvent was removed under reduced pressure. The remaining aqueous phase was extracted with methylene chloride (3 x 100 mL). The combined organic layers were washed with brine (300 mL) and dried over Na<sub>2</sub>SO<sub>4</sub>. The solvent was removed under reduced pressure to give the crude product. The obtained crude product was purified *via* flash-chromatography on silica gel using cyclohexane/ethyl acetate 10:1 to 4:1, giving *N*-((1-benzyl-3-(3,3-diisopropyltriaz-1-en-1-yl)-1H-pyrazol-4-yl)methyl)benzamide (**9b**, 111 mg, 266  $\mu$ mol, 41% yield) as a brown oil.

**9b:** (E)-N-((1-benzyl-3-(3,3-diisopropyltriaz-1-en-1-yl)-1H-pyrazol-4-yl)methyl)benzamide; Formula: C<sub>24</sub>H<sub>30</sub>N<sub>6</sub>O; Exact Mass: 418.2481; Smiles: CC(N(C(C)C)/N=N/c1nn(cc1CNC(=O)c1ccccc1)Cc1ccccc1)C; InChIKey: CYCAXLGFKDSWNS-BYCLXTJYSA-N

$R_f$  = 0.38 (cyclohexane/ethyl acetate 1:1). <sup>1</sup>H NMR (400 MHz, CDCl<sub>3</sub>, ppm)  $\delta$  = 7.73–7.66 (m, 2H), 7.49–7.27 (m, 9H), 6.50 (br.t,  $J$  = 5.5 Hz, 1H), 5.42 (br.s, 1H), 5.21 (s, 2H), 4.53 (d,  $J$  = 5.3 Hz, 2H), 3.97 (br.s, 1H), 1.33–1.17 (m, 12H); <sup>13</sup>C NMR (100 MHz, CDCl<sub>3</sub>, ppm)  $\delta$  = 167.2, 158.1, 136.4, 135.0, 131.4 (+, CH, 2C), 130.5 (+, CH), 128.9 (+, CH, 2C), 128.6 (+, CH, 2C), 128.2 (+, CH, 2C), 127.0 (+, CH, 2C), 107.5, 56.3 (–, CH<sub>2</sub>), 48.6 (+, CH), 45.5 (+, CH), 35.0 (–, CH<sub>2</sub>), 23.7 (+, CH<sub>3</sub>, 2C), 19.5 (+, CH<sub>3</sub>, 2C); MS (FAB, Matrix: 3-NBA):  $m/z$  (%) = 419 (27) [M+H]<sup>+</sup>, 318 (36) [M]<sup>+</sup>, 298 (22), 154 (12), 136 (12), 109 (11), 107 (14), 105 (75), 102 (16), 100 (10), 97 (12), 95 (23), 93 (16), 91 (100). HRMS–FAB ( $m/z$ ): [M+H]<sup>+</sup> Calcd for C<sub>24</sub>H<sub>31</sub>ON<sub>6</sub> 419.2559; Found 419.2559; IR (ATR,  $\tilde{\nu}$ ) = 3312 (w), 3064 (w), 3031 (vw), 2972 (w), 2928 (w), 2868 (w), 1730 (vw), 1642 (s), 1602 (w), 1578 (w), 1530 (s), 1487 (m), 1465 (m), 1455 (s), 1417 (vs), 1404 (vs), 1380 (m), 1363 (s), 1346 (s), 1293 (m), 1244 (vs), 1224 (vs), 1150 (vs), 1128 (s), 1098 (m), 1075 (w), 1031 (s), 1010 (w), 1001 (w), 986 (w), 925 (w), 911 (w), 890 (vw), 850 (vw), 802 (w), 755 (w), 694 (vs), 647 (m), 605 (w) cm<sup>–1</sup>.

Additional information on the chemical synthesis is available *via* Chemotion repository:

<https://doi.org/10.14272/reaction/SA-FUHFF-UHFFFADPSC-CYCAXLGFKD-UHFFFADPSC-NUHFF-NULGB-NUHFF-ZZZ>

Additional information on the analysis of the target compound is available *via* Chemotion repository:

<https://doi.org/10.14272/CYCAXLGFKDSWNS-BYCLXTJYSA-N.1>

**(E)-N-((3-(3,3-Diisopropyltriaz-1-en-1-yl)-1-(4-methylbenzyl)-1H-pyrazol-4-yl)methyl)-3-methylbutanamide (9c)**

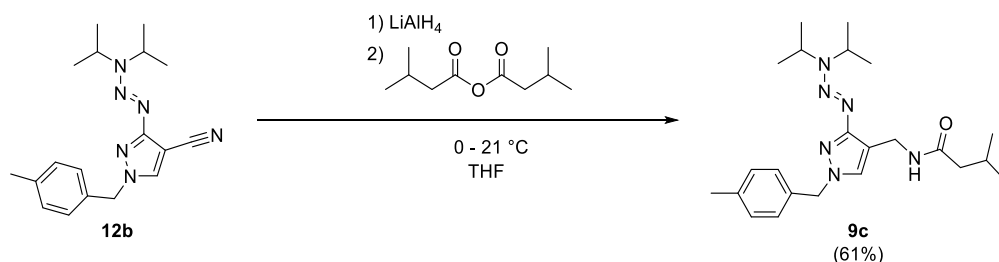

Step 1: (*E*)-3-(3,3-diisopropyltriaz-1-en-1-yl)-1-(4-methylbenzyl)-1*H*-pyrazole-4-carbonitrile (**12b**, 293 mg, 903  $\mu$ mol, 1.00 equiv) was dissolved in 150 mL of dry THF under nitrogen atmosphere. The solution was cooled to 0  $^{\circ}$ C before lithium aluminum hydride (103 mg, 2.71 mL, 2.71 mmol, 3.00 equiv) was slowly added. The cooling was removed and the solution was stirred at 21  $^{\circ}$ C for 14 hours, then additional 5 hours at 50  $^{\circ}$ C. The solution was cooled to 21  $^{\circ}$ C and the reaction was quenched with a saturated K/Na-tartrate solution (150 mL). The organic solvent was removed under reduced pressure and the remaining aqueous phase was extracted with methylene chloride (3 x 150 mL). The combined organic layers were washed with brine (400 mL) and dried over Na<sub>2</sub>SO<sub>4</sub>. The solvent was removed under reduced pressure to give the crude (*E*)-3-(3,3-diisopropyltriaz-1-en-1-yl)-1-(4-methylbenzyl)-1*H*-pyrazol-4-yl)methanamine, which was used for the next step without further purification.

Step 2: The crude (*E*)-3-(3,3-diisopropyltriaz-1-en-1-yl)-1-(4-methylbenzyl)-1*H*-pyrazol-4-yl)methanamine was dissolved in 150 mL of dry THF under nitrogen atmosphere. The solution was cooled to 0  $^{\circ}$ C before 3-methylbutanoyl 3-methylbutanoate (252 mg, 271  $\mu$ L, 1.35 mmol, 1.50 equiv) was slowly added. The cooling was removed and the solution was stirred for 14 hours at 21  $^{\circ}$ C. The reaction was quenched with a saturated K<sub>2</sub>CO<sub>3</sub> solution (150 mL) and the organic solvent was removed under reduced pressure. The remaining aqueous phase was extracted with methylene chloride (3 x 150 mL). The combined organic layers were washed with brine (400 mL) and dried over Na<sub>2</sub>SO<sub>4</sub>. The solvent was removed under reduced pressure to give the crude product. The obtained crude product was purified *via* flash-chromatography on silica gel using cyclohexane/ethyl acetate 4:1 to 1:1, giving (*E*)-*N*-((3-(3,3-diisopropyltriaz-1-en-1-yl)-1-(4-methylbenzyl)-1*H*-pyrazol-4-yl)methyl)-3-methylbutanamide (**9c**, 227 mg, 551  $\mu$ mol, 61% yield) as a light-brown oil.

**9c:** (*E*)-*N*-((3-(3,3-diisopropyltriaz-1-en-1-yl)-1-(4-methylbenzyl)-1*H*-pyrazol-4-yl)methyl)-3-methylbutanamide; Formula: C<sub>23</sub>H<sub>36</sub>N<sub>6</sub>O; Exact Mass: 412.2951; Smiles: CC(CC(=O)NCc1cn(nc1/N=N/N(C(C)C)C(C)C)Cc1ccc(cc1)C)C; InChIKey: MORMFGNFEXIKDM-IMVLJIQESA-N

$R_f$  = 0.05 (cyclohexane/ethyl acetate 4:1). <sup>1</sup>H NMR (400 MHz, CDCl<sub>3</sub>, ppm)  $\delta$  = 7.21–7.08 (m, 5H), 5.82 (br.t,  $J$  = 5.5 Hz, 1H), 5.42 (br.s, 1H), 5.14 (s, 2H), 4.31 (d,  $J$  = 5.5 Hz, 2H), 4.00 (br.s, 1H), 2.32 (s, 3H), 2.13–1.99 (m, 1H), 1.94 (d,  $J$  = 7.1 Hz, 2H), 1.34 (br.s, 6H), 1.22 (br.s, 6H), 0.88 (d,  $J$  = 6.6 Hz, 6H); <sup>13</sup>C NMR (100 MHz, CDCl<sub>3</sub>, ppm)  $\delta$  = 171.8, 157.9, 137.9, 133.3, 130.1 (+, CH), 129.5 (+, CH, 2C), 128.2 (+, CH, 2C), 107.8, 56.0, 48.4, 46.5 (–, CH<sub>2</sub>), 45.4 (–, CH<sub>2</sub>), 34.1 (–, CH<sub>2</sub>), 26.2 (+, CH), 23.8 (+, CH<sub>3</sub>, 2C), 22.5 (+, CH<sub>3</sub>, 2C), 21.2 (+, CH<sub>3</sub>), 19.4 (+, CH<sub>3</sub>, 2C). MS (FAB, Matrix: 3-NBA):  $m/z$  (%) = 414 (13) [M+2H]<sup>+</sup>, 413 (54) [M+H]<sup>+</sup>, 412 (14) [M]<sup>+</sup>, 411 (15), 313 (24), 312 (100), 105 (78). HRMS–FAB ( $m/z$ ): [M+H]<sup>+</sup> Calcd for C<sub>23</sub>H<sub>37</sub>ON<sub>6</sub>, 413.3029; Found 413.3030; IR (ATR,  $\tilde{\nu}$ ) = 3432 (vw), 3292 (w), 3078 (vw), 3055 (vw), 2956 (m), 2928 (w), 2868 (w), 1643 (vs), 1536 (m), 1516 (m), 1465 (s), 1421 (vs), 1402 (vs), 1380 (m), 1364 (vs), 1307 (w), 1242 (vs), 1224 (vs), 1181 (m), 1149 (vs), 1126 (vs), 1099 (m), 1033 (s), 1010 (m), 962 (w), 922 (w), 911 (w), 885 (w), 843 (w), 823 (w), 796 (s), 752 (m), 727 (m), 698 (w), 677 (w), 640 (w), 629 (w) cm<sup>–1</sup>.

Additional information on the chemical synthesis is available *via* Chemotion repository:

<https://doi.org/10.14272/reaction/SA-FUHFF-UHFFFADPSC-MORMFGNFEX-UHFFFADPSC-NUHFF-NIWVK-NUHFF-ZZZ>

Additional information on the analysis of the target compound is available *via* Chemotion repository:

<https://doi.org/10.14272/MORMFGNFEXIKDM-IMVLJIQESA-N.1>

**(E)-N-((1-(3,5-difluorobenzyl)-3-(3,3-diisopropyltriaz-1-en-1-yl)-1H-pyrazol-4-yl)methyl)acetamide (9d)**

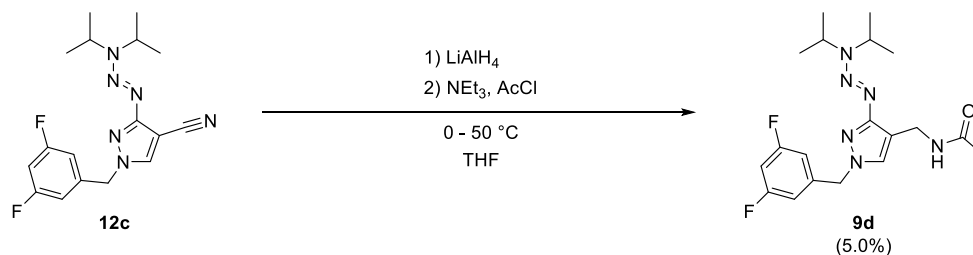

Step 1: 1-(3,5-difluorobenzyl)-3-(3,3-diisopropyltriaz-1-en-1-yl)-1H-pyrazole-4-carbonitrile (**12c**, 261 mg, 754  $\mu\text{mol}$ , 1.00 equiv) was dissolved in 75 mL of dry THF under nitrogen atmosphere. The solution was cooled to 0 °C before lithium aluminum hydride (85.9 mg, 2.26 mL, 2.26 mmol, 3.00 equiv) was slowly added. The cooling was removed and the solution was stirred at 21 °C for 14 hours, then additional 5 hours at 50 °C. The solution was cooled to 21 °C and the reaction was quenched with a saturated K/Na-tartrate solution (75 mL). The organic solvent was removed under reduced pressure and the remaining aqueous phase was extracted with methylene chloride (3 x 75 mL). The combined organic layers were washed with brine (150 mL) and dried over  $\text{Na}_2\text{SO}_4$ . The solvent was removed under reduced pressure to give the crude (1-(3,5-difluorobenzyl)-3-(3,3-diisopropyltriaz-1-en-1-yl)-1H-pyrazol-4-yl)methanamine, which was used for the next step without further purification.

Step 2: The crude (1-(3,5-difluorobenzyl)-3-(3,3-diisopropyltriaz-1-en-1-yl)-1H-pyrazol-4-yl)methanamine was dissolved in 75 mL of dry THF under nitrogen atmosphere. Triethylamine (229 mg, 315  $\mu\text{L}$ , 2.26 mmol, 3.00 equiv) was added and the solution was cooled to 0 °C before acetyl chloride (88.8 mg, 80.4  $\mu\text{L}$ , 1.13 mmol, 1.50 equiv) was added dropwise. The cooling was removed and the solution was stirred for 14 hours at 21 °C. The reaction was quenched with a saturated  $\text{K}_2\text{CO}_3$  solution (75 mL) and the organic solvent was removed under reduced pressure. The remaining aqueous phase was extracted with methylene chloride (3 x 75 mL). The combined organic layers were washed with brine (150 mL) and dried over  $\text{Na}_2\text{SO}_4$ . The solvent was removed under reduced pressure to give the crude product. The obtained crude product was purified *via* flash-chromatography on silica gel using methylene chloride/methanol 50:1 to 30:1. It was further purified *via* HPLC using MeCN/ $\text{H}_2\text{O}$  10:1, to give (E)-N-((1-(3,5-difluorobenzyl)-3-(3,3-diisopropyltriaz-1-en-1-yl)-1H-pyrazol-4-yl)methyl)acetamide (**9d**, 15.0 mg, 38.2  $\mu\text{mol}$ , 5% yield) as a colorless oil.

**9d:** (E)-N-((1-(3,5-difluorobenzyl)-3-(3,3-diisopropyltriaz-1-en-1-yl)-1H-pyrazol-4-yl)methyl)acetamide;  
Formula:  $\text{C}_{19}\text{H}_{26}\text{F}_2\text{N}_6\text{O}$ ; Exact Mass: 392.2136; Smiles: CC(=O)NCc1cn(nc1/N=N/N(C(C)C)C(C)C)Cc1cc(F)cc(c1)F; InChIKey: NQVQLXTURKHERM-WJTDDFOZSA-N

$R_f$  = 0.47 (cyclohexane/ethyl acetate 1:1).  $^1\text{H}$  NMR (400 MHz,  $\text{CDCl}_3$ , ppm)  $\delta$  = 7.30 (s, 1H), 6.80–6.65 (m, 3H), 5.91 (br.t,  $J$  = 5.6 Hz, 1H), 5.43 (br.s, 1H), 5.15 (s, 2H), 4.34 (d,  $J$  = 5.5 Hz, 2H), 4.02 (br.s, 1H), 1.93 (s, 3H), 1.36 (d,  $J$  = 6.6 Hz, 6H), 1.22 (d,  $J$  = 6.8 Hz, 6H);  $^{19}\text{F}$  NMR (375 MHz, ppm)  $\delta$  = -109.05;  $^{13}\text{C}$  NMR (100 MHz,  $\text{CDCl}_3$ , ppm)  $\delta$  = 169.5, 163.3 (2C; dd,  $J$  = 249.5 Hz,  $J$  = 12.6 Hz), 158.5, 140.6 (t,  $J$  = 8.9 Hz), 130.7 (+, CH), 110.6 (+, CH, 2C; dd,  $J$  = 18.6 Hz,  $J$  = 7.2 Hz), 108.2, 103.5 (+, CH; t,  $J$  = 25.3 Hz), 55.2 (–,  $\text{CH}_2$ ; t,  $J$  = 2.3 Hz), 48.4 (+, CH), 45.5 (+, CH), 34.3 (–,  $\text{CH}_2$ ), 23.8 (+,  $\text{CH}_3$ , 2C), 23.6 (+,  $\text{CH}_3$ ), 19.5 (+,  $\text{CH}_3$ , 2C); MS (FAB, Matrix: 3-NBA):  $m/z$  (%) = 394 (20)  $[\text{M}+2\text{H}]^+$ , 393 (100)  $[\text{M}+\text{H}]^+$ , 392 (14)  $[\text{M}]^+$ , 375 (11), 334 (17), 292 (52), 154 (30), 138 (12), 137 (19), 136 (24), 127 (32), 100 (21). HRMS–FAB ( $m/z$ ):  $[\text{M}+\text{H}]^+$  Calcd for  $\text{C}_{19}\text{H}_{27}\text{ON}_6\text{F}_2$ , 393.2214; Found 393.2212; IR (ATR,  $\hat{\nu}$ ) = 3288 (w), 3081 (vw), 2975 (w), 2931 (w), 2870 (vw), 1650 (s), 1626 (vs), 1596 (s), 1543 (m), 1460 (s), 1418 (vs), 1364 (vs), 1340 (s), 1317 (s), 1245 (vs), 1224 (vs), 1153 (vs), 1118 (vs), 1098 (m), 1034 (m), 1001 (m), 846 (s), 728 (vs), 670 (m), 645 (w), 526 (m), 510 (m)  $\text{cm}^{-1}$ .

Additional information on the chemical synthesis is available *via* Chemotion repository:

<https://doi.org/10.14272/reaction/SA-FUHFF-UHFFFADPSC-NQVQLXTURK-UHFFFADPSC-NUHFF-NCVEK-NUHFF-ZZZ>

Additional information on the analysis of the target compound is available *via* Chemotion repository:

<https://doi.org/10.14272/NQVQLXTURKHERM-WJTDDFOZSA-N.1>



**(E)-N-((3-(3,3-Diisopropyltriaz-1-en-1-yl)-1-ethyl-1H-pyrazol-4-yl)methyl)acetamide (9e)**

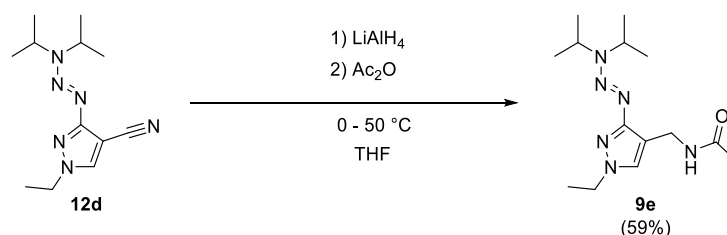

Step 1: (*E*)-3-(3-(3,3-Diisopropyltriaz-1-en-1-yl)-1-ethyl-1*H*-pyrazol-4-yl)propanenitrile (**12d**, 88.7 mg, 357 μmol, 1.00 equiv) was dissolved in 60 mL of dry THF under nitrogen atmosphere. The solution was cooled to 0 °C before lithium aluminum hydride (40.7 mg, 1.07 mL, 1.07 mmol, 1.00M, 3.00 equiv) was slowly added. The cooling was removed and the solution was stirred at 21 °C for 14 hours, then additional 5 hours at 50 °C. The solution was cooled to 21 °C and the reaction was quenched with a saturated K/Na-tartrate solution (60 mL). The organic solvent was removed under reduced pressure and the remaining aqueous phase was extracted with methylene chloride (3 x 60 mL). The combined organic layers were washed with brine (150 mL) and dried over Na<sub>2</sub>SO<sub>4</sub>. The solvent was removed under reduced pressure to give the crude (*E*)-3-(3-(3,3-diisopropyltriaz-1-en-1-yl)-1-ethyl-1*H*-pyrazol-4-yl)methanamine, which was used for the next step without further purification.

Step 2: The crude (*E*)-3-(3-(3,3-diisopropyltriaz-1-en-1-yl)-1-ethyl-1*H*-pyrazol-4-yl)methanamine was dissolved in 60 mL of dry THF under nitrogen atmosphere. The solution was cooled to 0 °C before acetic anhydride (54.7 mg, 50.6 μL, 536 μmol, 1.50 equiv) was slowly added. The cooling was removed and the solution was stirred for 14 hours at 21 °C. The reaction was quenched with a saturated K<sub>2</sub>CO<sub>3</sub> solution (60 mL) and the organic solvent was removed under reduced pressure. The remaining aqueous phase was extracted with methylene chloride (3 x 60 mL). The combined organic layers were washed with brine (150 mL) and dried over Na<sub>2</sub>SO<sub>4</sub>. The solvent was removed under reduced pressure to give the crude product. The obtained crude product was purified *via* flash-chromatography on silica gel using cyclohexane/ethyl acetate 2:1 to 1:1 to pure ethyl acetate, to give (*E*)-*N*-((3-(3,3-diisopropyltriaz-1-en-1-yl)-1-ethyl-1*H*-pyrazol-4-yl)methyl)acetamide (**9e**, 62.1 mg, 211 μmol, 59% yield) as a light-brown oil.

**9e:** (*E*)-*N*-((3-(3,3-diisopropyltriaz-1-en-1-yl)-1-ethyl-1*H*-pyrazol-4-yl)methyl)acetamide; Formula: C<sub>14</sub>H<sub>26</sub>N<sub>6</sub>O; Exact Mass: 294.2168; Smiles: CCn1cc(c(n1)/N=N/N(C(C)C)C(C)C)CNC(=O)C; InChIKey: SSTDOKZYUWDQQQ-FBMGVBCBSA-N

*R*<sub>f</sub> = 0.15 (pure ethyl acetate). <sup>1</sup>H NMR (400 MHz, CDCl<sub>3</sub>, ppm) δ = 7.24 (s, 1H), 5.94 (t, *J* = 5.3 Hz, 1H), 5.41 (br.s, 1H), 4.30 (d, *J* = 5.4 Hz, 2H), 4.11–3.89 (m, 3H), 1.90 (s, 3H), 1.44 (t, *J* = 7.3 Hz, 3H), 1.32 (br.s, 6H), 1.19 (br.s, 6H); <sup>13</sup>C NMR (100 MHz, CDCl<sub>3</sub>, ppm) δ = 169.4, 157.8, 129.5 (+, CH), 106.6, 48.2 (+, CH), 47.1 (–, CH<sub>2</sub>), 45.3 (+, CH), 34.3 (–, CH<sub>2</sub>), 23.7 (+, CH<sub>3</sub>, 2C), 23.5 (+, CH<sub>3</sub>), 19.4 (+, CH<sub>3</sub>, 2C), 15.5 (+, CH<sub>3</sub>); MS (FAB, Matrix: 3-NBA): *m/z* (%) = 296 (17) [M+2H]<sup>+</sup>, 295 (99) [M+H]<sup>+</sup>, 294 (13) [M]<sup>+</sup>, 293 (26) [M-H]<sup>+</sup>, 237 (10), 236 (69), 195 (13), 194 (100), 154 (12), 150 (14), 139 (12), 133 (41), 125 (34), 124 (15), 109 (13), 107 (12), 100 (14), 95 (16), 93 (12), 91 (19). HRMS–FAB (*m/z*): [M+H]<sup>+</sup> Calcd for C<sub>14</sub>H<sub>27</sub>ON<sub>6</sub>, 295.2241; Found 295.2243; IR (ATR,  $\tilde{\nu}$ ) = 3360 (w), 3262 (w), 3210 (w), 3077 (w), 2976 (w), 2932 (w), 2873 (w), 2225 (vw), 1650 (vs), 1571 (s), 1462 (w), 1407 (vs), 1380 (s), 1364 (vs), 1344 (vs), 1334 (s), 1302 (m), 1254 (vs), 1238 (vs), 1224 (vs), 1181 (s), 1166 (s), 1153 (vs), 1129 (s), 1096 (s), 1034 (s), 1018 (m), 992 (w), 953 (w), 926 (w), 912 (w), 882 (w), 849 (w), 829 (m), 792 (w), 724 (m), 713 (s), 701 (m), 639 (m), 606 (m) cm<sup>–1</sup>.

Additional information on the chemical synthesis is available *via* Chemotion repository:

<https://doi.org/10.14272/reaction/SA-FUHFF-UHFFFADPSC-SSTDOKZYUW-UHFFFADPSC-NUHFF-NUVCO-NUHFF-ZZZ>

Additional information on the analysis of the target compound is available *via* Chemotion repository:

<https://doi.org/10.14272/SSTDOKZYUWDQQQ-FBMGVBCBSA-N.1>

**(E)-N-((1-Cyclopentyl-3-(3,3-diisopropyltriaz-1-en-1-yl)-1H-pyrazol-4-yl)methyl)acetamide (9f)**

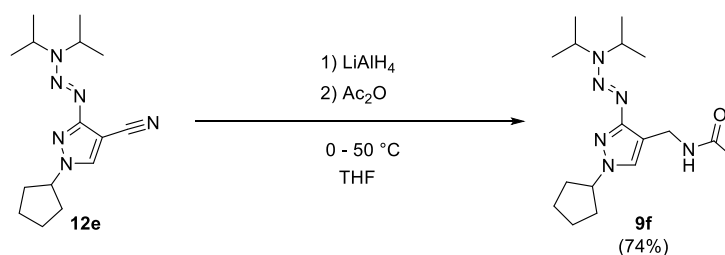

Step 1: 1-Cyclopentyl-3-(3,3-diisopropyltriaz-1-en-1-yl)-1H-pyrazole-4-carbonitrile (**12e**, 132 mg, 459  $\mu\text{mol}$ , 1.00 equiv) was dissolved in 75 mL of dry THF under nitrogen atmosphere. The solution was cooled to 0 °C before lithium aluminum hydride (52.2 mg, 1.38 mL, 1.38 mmol, 3.00 equiv) was slowly added. The cooling was removed and the solution was stirred at 21 °C for 14 hours, then additional 5 hours at 50 °C. The solution was cooled to 21 °C and the reaction was quenched with a saturated K/Na-tartrate solution (75 mL). The organic solvent was removed under reduced pressure and the remaining aqueous phase was extracted with methylene chloride (3 x 75 mL). The combined organic layers were washed with brine (200 mL) and dried over  $\text{Na}_2\text{SO}_4$ . The solvent was removed under reduced pressure to give the crude (1-cyclopentyl-3-(3,3-diisopropyltriaz-1-en-1-yl)-1H-pyrazol-4-yl)methanamine, which was used for the next step without further purification.

Step 2: The crude (1-cyclopentyl-3-(3,3-diisopropyltriaz-1-en-1-yl)-1H-pyrazol-4-yl)methanamine was dissolved in 75 mL of dry THF under nitrogen atmosphere. The solution was cooled to 0 °C before acetic anhydride (70.3 mg, 65.0  $\mu\text{L}$ , 688  $\mu\text{mol}$ , 1.50 equiv) was slowly added. The cooling was removed and the solution was stirred for 14 hours at 21 °C. The reaction was quenched with a saturated  $\text{K}_2\text{CO}_3$  solution (75 mL) and the organic solvent was removed under reduced pressure. The remaining aqueous phase was extracted with methylene chloride (3 x 75 mL). The combined organic layers were washed with brine (200 mL) and dried over  $\text{Na}_2\text{SO}_4$ . The solvent was removed under reduced pressure to give the crude product. The obtained crude product was purified *via* flash-chromatography on silica gel using cyclohexane/ethyl acetate 2:1 to 1:1 to pure ethyl acetate, to give *N*-((1-cyclopentyl-3-(3,3-diisopropyltriaz-1-en-1-yl)-1H-pyrazol-4-yl)methyl)acetamide (**9f**, 114 mg, 340  $\mu\text{mol}$ , 74% yield) as a light-brown oil.

**9f:** (E)-N-((1-cyclopentyl-3-(3,3-diisopropyltriaz-1-en-1-yl)-1H-pyrazol-4-yl)methyl)acetamide; Formula:  $\text{C}_{17}\text{H}_{30}\text{N}_6\text{O}$ ; Exact Mass: 334.2481; Smiles: CC(=O)NCc1cn(nc1/N=N/N(C(C)C)C(C)C)C1CCCC1; InChIKey: GZDXDXORFZUUVGU-XUTLUUPISA-N

$R_f$  = 0.03 (cyclohexane/ethyl acetate 2:1).  $^1\text{H}$  NMR (400 MHz,  $\text{CDCl}_3$ , ppm)  $\delta$  = 7.28 (s, 1H), 5.91 (t,  $J$  = 5.5 Hz, 1H), 5.49 (br.s, 1H), 4.50 (p,  $J$  = 7.4 Hz, 1H), 4.30 (d,  $J$  = 5.4 Hz, 2H), 3.97 (br.s, 1H), 2.16–1.96 (m, 4H), 1.91 (s, 3H), 1.88–1.77 (m, 2H), 1.71–1.58 (m, 2H), 1.32 (s, 6H), 1.19 (s, 6H);  $^{13}\text{C}$  NMR (100 MHz,  $\text{CDCl}_3$ , ppm)  $\delta$  = 169.3, 157.7, 128.8 (+, CH), 106.2, 63.2 (+, CH), 48.0 (+, CH), 45.0 (+, CH), 34.4 (–,  $\text{CH}_2$ ), 32.8 (–,  $\text{CH}_2$ , 2C), 24.1 (–,  $\text{CH}_2$ , 2C), 23.7 (+,  $\text{CH}_3$ , 2C), 23.6 (+,  $\text{CH}_3$ ), 19.5 (+,  $\text{CH}_3$ , 2C); MS (FAB, Matrix: 3-NBA):  $m/z$  (%) = 235 (14)  $[\text{M}+2\text{H}]^+$ , 234 (100)  $[\text{M}+\text{H}]^+$ , 233 (6)  $[\text{M}]^+$ , 232 (10)  $[\text{M}-\text{H}]^+$ , 192 (10), 155 (15), 154 (48), 139 (10), 138 (20), 137 (30), 136 (34), 109 (11), 107 (13), 97 (11), 95 (15), 91 (13); MS (FAB, Matrix: 3-NBA):  $m/z$  (%) = 336 (20)  $[\text{M}+2\text{H}]^+$ , 335 (100)  $[\text{M}+\text{H}]^+$ , 334 (17)  $[\text{M}]^+$ , 333 (17)  $[\text{M}-\text{H}]^+$ , 276 (43), 235 (12), 234 (85), 100 (23), 97 (31), 96 (17), 95 (15), 85 (10). HRMS–FAB ( $m/z$ ):  $[\text{M}+\text{H}]^+$  Calcd for  $\text{C}_{17}\text{H}_{31}\text{ON}_6$ , 355.2554; Found 335.2555; IR (ATR,  $\tilde{\nu}$ ) = 3288 (w), 3274 (w), 3080 (vw), 3070 (vw), 2969 (m), 2938 (w), 2871 (w), 2230 (vw), 1650 (vs), 1543 (s), 1465 (m), 1421 (vs), 1240 (vs), 1363 (vs), 1340 (m), 1319 (w), 1239 (vs), 1224 (vs), 1152 (vs), 1128 (s), 1095 (m), 1033 (s), 1011 (w), 911 (w), 885 (vw), 847 (vw), 806 (w), 728 (m), 643 (w)  $\text{cm}^{-1}$ .

Additional information on the chemical synthesis is available *via* Chemotion repository:

<https://doi.org/10.14272/reaction/SA-FUHFF-UHFFFADPSC-GZDXDXORFZU-UHFFFADPSC-NUHFF-NHIGY-NUHFF-ZZZ>

Additional information on the analysis of the target compound is available *via* Chemotion repository:

<https://doi.org/10.14272/GZDXDXORFZUUVGU-XUTLUUPISA-N.1>

**(E)-N-((1-cyclopentyl-3-(3,3-diisopropyltriaz-1-en-1-yl)-1H-pyrazol-4-yl)methyl)benzamide (9g)**

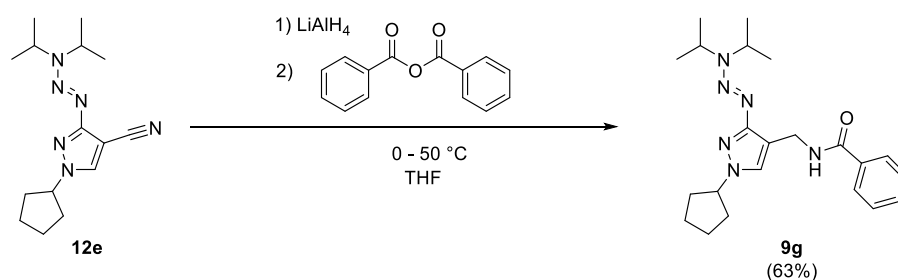

Step 1: (*E*)-1-cyclopentyl-3-(3,3-diisopropyltriaz-1-en-1-yl)-1*H*-pyrazole-4-carbonitrile (**12e**, 327 mg, 1.14 mmol, 1.00 equiv) was dissolved in 180 mL of dry THF under nitrogen atmosphere. The solution was cooled to 0 °C before lithium aluminum hydride (129 mg, 3.41 mL, 3.41 mmol, 3.00 equiv) was slowly added. The cooling was removed and the solution was stirred at 21 °C for 14 hours, then additional 5 hours at 50 °C. The solution was cooled to 21 °C and the reaction was quenched with a saturated K/Na-tartrate solution (150 mL). The organic solvent was removed under reduced pressure and the remaining aqueous phase was extracted with methylene chloride (3 x 150 mL). The combined organic layers were washed with brine (400 mL) and dried over  $\text{Na}_2\text{SO}_4$ . The solvent was removed under reduced pressure to give the crude (*E*)-(1-cyclopentyl-3-(3,3-diisopropyltriaz-1-en-1-yl)-1*H*-pyrazol-4-yl)methanamine, which was used for the next step without further purification.

Step 2: The crude (*E*)-(1-cyclopentyl-3-(3,3-diisopropyltriaz-1-en-1-yl)-1*H*-pyrazol-4-yl)methanamine was dissolved in 150 mL of dry THF under nitrogen atmosphere. The solution was cooled to 0 °C before benzoyl benzoate (385 mg, 1.70 mmol, 1.50 equiv) was slowly added. The cooling was removed and the solution was stirred for 14 hours at 21 °C. The reaction was quenched with a saturated  $\text{K}_2\text{CO}_3$  solution (150 mL) and the organic solvent was removed under reduced pressure. The remaining aqueous phase was extracted with methylene chloride (3 x 150 mL). The combined organic layers were washed with brine (400 mL) and dried over  $\text{Na}_2\text{SO}_4$ . The solvent was removed under reduced pressure to give the crude product. The obtained crude product was purified *via* flash-chromatography on silica gel using cyclohexane/ethyl acetate 4:1 to 1:1, to give (*E*)-*N*-((1-cyclopentyl-3-(3,3-diisopropyltriaz-1-en-1-yl)-1*H*-pyrazol-4-yl)methyl)benzamide (**9g**, 285 mg, 719  $\mu\text{mol}$ , 63% yield) as a colorless solid.

**9g:** (*E*)-*N*-((1-cyclopentyl-3-(3,3-diisopropyltriaz-1-en-1-yl)-1*H*-pyrazol-4-yl)methyl)benzamide; Formula:  $\text{C}_{22}\text{H}_{32}\text{N}_6\text{O}$ ; Exact Mass: 396.2638; Smiles: CC(N(C(C)C)/N=N/c1nn(cc1CNC(=O)C1CCCC1)C1CCCC1)C; InChIKey: SMDRKVWNQXOQTQ-SHHOIMCASA-N

$R_f$  = 0.50 (cyclohexane/ethyl acetate 2:1).  $^1\text{H}$  NMR (400 MHz,  $\text{CDCl}_3$ , ppm)  $\delta$  = 7.75–7.67 (m, 2H), 7.50–7.42 (m, 1H), 7.42–7.34 (m, 3H), 6.47 (br.t,  $J$  = 5.4 Hz, 1H), 5.51 (br.s, 1H), 4.60–4.46 (m, 3H), 3.95 (br.s, 1H), 2.18–2.00 (m, 4H), 1.92–1.79 (m, 2H), 1.73–1.60 (m, 2H), 1.27–1.14 (m, 12H).  $^{13}\text{C}$  NMR (100 MHz,  $\text{CDCl}_3$ , ppm)  $\delta$  = 167.1, 157.8, 135.0, 131.4 (+, CH), 129.1 (+, CH), 128.6 (+, CH, 2C), 127.0 (+, CH, 2C), 106.1, 63.2 (+, CH), 48.2 (+, CH), 45.1 (+, CH), 35.0 (–,  $\text{CH}_2$ ), 32.8 (–,  $\text{CH}_2$ , 2C), 24.1 (–,  $\text{CH}_2$ , 2C), 23.7 (+,  $\text{CH}_3$ , 2C), 19.5 (+,  $\text{CH}_3$ , 2C); MS (FAB, Matrix: 3-NBA):  $m/z$  (%) = 397 (39)  $[\text{M}+\text{H}]^+$ , 396 (13)  $[\text{M}]^+$ , 395 (20)  $[\text{M}-\text{H}]^+$ , 297 (20), 296 (100), 277 (11), 276 (59), 269 (14), 165 (14), 133 (74), 106 (10), 105 (93), 100 (12), 99 (11), 97 (54), 96 (14). HRMS–FAB ( $m/z$ ):  $[\text{M}+\text{H}]^+$  Calcd for  $\text{C}_{22}\text{H}_{33}\text{ON}_6$ , 397.2710; Found 397.2710. IR (ATR,  $\tilde{\nu}$ ) = 3360 (w), 3061 (vw), 2973 (m), 2867 (w), 1738 (vw), 1656 (s), 1636 (s), 1599 (w), 1575 (w), 1560 (w), 1534 (vs), 1489 (s), 1463 (m), 1441 (s), 1421 (vs), 1398 (vs), 1361 (vs), 1341 (m), 1327 (m), 1299 (s), 1239 (vs), 1224 (vs), 1190 (w), 1179 (m), 1153 (vs), 1129 (vs), 1098 (m), 1078 (m), 1033 (s), 1011 (m), 1003 (m), 980 (w), 942 (w), 912 (m), 880 (w), 849 (w), 822 (w), 812 (w), 802 (w), 793 (w), 725 (vs), 696 (vs), 670 (w), 632 (m)  $\text{cm}^{-1}$ .

Additional information on the chemical synthesis is available *via* Chemotion repository:

<https://doi.org/10.14272/reaction/SA-FUHFF-UHFFFADPSC-SMDRKVWNQX-UHFFFADPSC-NUHFF-NSKKF-NUHFF-ZZZ>

Additional information on the analysis of the target compound is available *via* Chemotion repository:

<https://doi.org/10.14272/SMDRKVWNQXOQTQ-SHHOIMCASA-N.1>

**(*E*)-*N*-((3-(3,3-Diisopropyltriaz-1-en-1-yl)-1-isobutyl-1*H*-pyrazol-4-yl)methyl)acetamide (**9h**)**

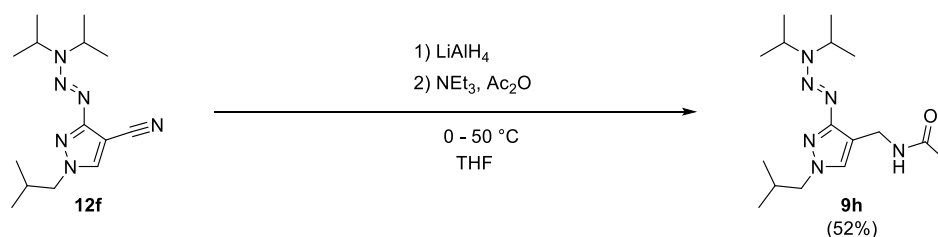

Step 1: (*E*)-3-(3-(3,3-Diisopropyltriaz-1-en-1-yl)-1-isobutyl-1*H*-pyrazole-4-carbonitrile (**12f**, 186 mg, 672 μmol, 1.00 equiv) was dissolved in 27 mL of dry THF under nitrogen atmosphere. The solution was cooled to 0 °C before lithium aluminum hydride (76.5 mg, 2.02 mL, 2.02 mmol, 3.00 equiv) was slowly added. The cooling was removed and the solution was stirred at 21 °C for 14 hours, then additional 5 hours at 50 °C. The solution was cooled to 21 °C and the reaction was quenched with a saturated K/Na-tartrate solution (30 mL). The organic solvent was removed under reduced pressure and the remaining aqueous phase was extracted with methylene chloride (3 x 30 mL). The combined organic layers were washed with brine (100 mL) and dried over Na<sub>2</sub>SO<sub>4</sub>. The solvent was removed under reduced pressure to give the crude (*E*)-3-(3-(3,3-diisopropyltriaz-1-en-1-yl)-1-isobutyl-1*H*-pyrazol-4-yl)methanamine, which was used for the next step without further purification.

Step 2: Crude (*E*)-3-(3-(3,3-diisopropyltriaz-1-en-1-yl)-1-isobutyl-1*H*-pyrazol-4-yl)methanamine was dissolved in 27 mL of dry THF under nitrogen atmosphere. Triethylamine (204 mg, 280 μL, 2.02 mmol, 3.00 equiv) was added and the solution was cooled to 0 °C before acetic anhydride (103 mg, 95.3 μL, 1.01 mmol, 1.50 equiv) was added dropwise. The cooling was removed and the solution was stirred for 14 hours at 21 °C. The reaction was quenched with a saturated K<sub>2</sub>CO<sub>3</sub> solution (30 mL) and the organic solvent was removed under reduced pressure. The remaining aqueous phase was extracted with methylene chloride (3 x 30 mL). The combined organic layers were washed with brine (100 mL) and dried over Na<sub>2</sub>SO<sub>4</sub>. The solvent was removed under reduced pressure to give the crude product. The obtained crude product was purified *via* flash-chromatography on silica gel using methylene chloride/methanol 50:1 to 30:1, giving (*E*)-*N*-((3-(3,3-diisopropyltriaz-1-en-1-yl)-1-isobutyl-1*H*-pyrazol-4-yl)methyl)acetamide (**9h**, 114 mg, 353 μmol, 52% yield) as a colorless oil.

**9h:** (*E*)-*N*-((3-(3,3-diisopropyltriaz-1-en-1-yl)-1-isobutyl-1*H*-pyrazol-4-yl)methyl)acetamide; Formula: C<sub>16</sub>H<sub>30</sub>N<sub>6</sub>O; Exact Mass: 322.2481; Smiles: CC(=O)NCc1cn(nc1/N=N/N(C(C)C)C(C)C)CC(C)C; InChIKey: RZSNDUJLUYXXQT-CZIZESTLSA-N

*R*<sub>f</sub> = 0.06 (cyclohexane/ethyl acetate 1:1). <sup>1</sup>H NMR (400 MHz, CDCl<sub>3</sub>, ppm) δ = 7.20 (s, 1H), 5.92 (s, 1H), 5.43 (br.s, 1H), 4.30 (d, *J* = 5.4 Hz, 2H), 3.98 (br.s, 1H), 3.75 (d, *J* = 7.3 Hz, 2H), 2.22 (hept, *J* = 6.8 Hz, 1H), 1.90 (s, 3H), 1.32 (br.s, 6H), 1.19 (br.s, 6H), 0.88 (d, *J* = 6.7 Hz, 6H); <sup>13</sup>C NMR (100 MHz, CDCl<sub>3</sub>, ppm) δ = 169.3, 157.8, 130.7 (+, CH), 106.3, 59.9 (–, CH<sub>2</sub>), 48.1 (+, CH), 45.2 (+, CH), 34.3 (–, CH<sub>2</sub>), 29.4 (+, CH), 23.7 (+, 2C, CH<sub>3</sub>), 23.6 (+, 2C, CH<sub>3</sub>), 20.1 (+, CH<sub>3</sub>), 19.4 (+, 2C, CH<sub>3</sub>); MS (FAB, Matrix: 3-NBA): *m/z* (%) = 324 (11) [M+2H]<sup>+</sup>, 323 (58) [M+H]<sup>+</sup>, 322 (7) [M]<sup>+</sup>, 321 (13) [M-H]<sup>+</sup>, 265 (11), 264 (65), 223 (13), 222 (100), 178 (14), 153 (19), 152 (11), 109 (14), 100 (21), 99 (10), 97 (21), 96 (15), 95 (20), 93 (13). HRMS–FAB (*m/z*): [M+H]<sup>+</sup> Calcd for C<sub>16</sub>H<sub>31</sub>ON<sub>6</sub>, 323.2559; Found 323.2561; IR (ATR,  $\tilde{\nu}$ ) = 2968 (m), 2931 (m), 2871 (w), 1650 (vs), 1541 (s), 1465 (s), 1421 (vs), 1402 (vs), 1364 (vs), 1341 (s), 1244 (vs), 1220 (vs), 1153 (vs), 1126 (vs), 1095 (s), 1034 (vs), 1014 (s), 946 (m), 924 (s), 911 (s), 851 (m), 841 (m), 819 (m), 806 (m), 730 (vs), 643 (m), 628 (m) cm<sup>–1</sup>.

Additional information on the chemical synthesis is available *via* Chemotion repository:

<https://doi.org/10.14272/reaction/SA-FUHFF-UHFFFADPSC-RZSNDUJLUY-UHFFFADPSC-NUHFF-NJAIL-NUHFF-ZZZ>

Additional information on the analysis of the target compound is available *via* Chemotion repository:

<https://doi.org/10.14272/RZSNDUJLUYXXQT-CZIZESTLSA-N.1>

**(E)-2-(4-(Acetamidomethyl)-3-(3,3-diisopropyltriaz-1-en-1-yl)-1H-pyrazol-1-yl)ethyl acetate (9i)**

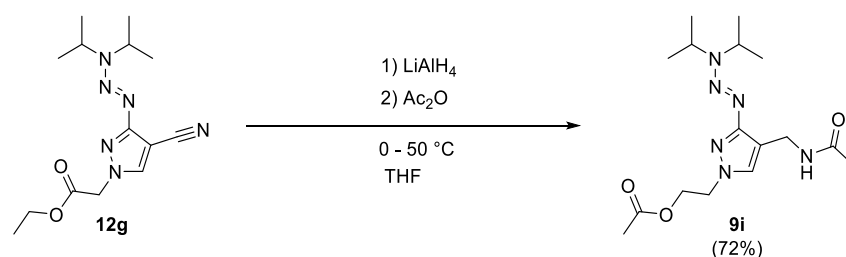

Step 1: Ethyl (*E*)-2-(4-cyano-3-(3,3-diisopropyltriaz-1-en-1-yl)-1*H*-pyrazol-1-yl)acetate (**12g**, 277 mg, 904  $\mu$ mol, 1.00 equiv) was dissolved in 150 mL of dry THF under nitrogen atmosphere. The solution was cooled to 0 °C before lithium aluminum hydride (103 mg, 2.71 mL, 2.71 mmol, 3.00 equiv) was slowly added. The cooling was removed and the solution was stirred at 21 °C for 14 hours, then additional 5 hours at 50 °C. The solution was cooled to 21 °C and the reaction was quenched with a saturated K/Na-tartrate solution (150 mL). The organic solvent was removed under reduced pressure and the remaining aqueous phase was extracted with methylene chloride (3 x 150 mL). The combined organic layers were washed with brine (400 mL) and dried over Na<sub>2</sub>SO<sub>4</sub>. The solvent was removed under reduced pressure to give the crude (*E*)-2-(4-(aminomethyl)-3-(3,3-diisopropyltriaz-1-en-1-yl)-1*H*-pyrazol-1-yl)ethan-1-ol, which was used for the next step without further purification.

Step 2: The crude (*E*)-2-(4-(aminomethyl)-3-(3,3-diisopropyltriaz-1-en-1-yl)-1*H*-pyrazol-1-yl)ethan-1-ol was dissolved in 150 mL of dry THF under nitrogen atmosphere. The solution was cooled to 0 °C before acetic anhydride (369 mg, 342  $\mu$ L, 3.61 mmol, 4.00 equiv) was slowly added. The cooling was removed and the solution was stirred for 14 hours at 21 °C. The reaction was quenched with a saturated K<sub>2</sub>CO<sub>3</sub> solution (150 mL) and the organic solvent was removed under reduced pressure. The remaining aqueous phase was extracted with methylene chloride (3 x 150 mL). The combined organic layers were washed with brine (400 mL) and dried over Na<sub>2</sub>SO<sub>4</sub>. The solvent was removed under reduced pressure to give the crude product. The obtained crude product was purified *via* flash-chromatography on silica gel using cyclohexane/ethyl acetate 2:1 to 1:1 to pure ethyl acetate, giving (*E*)-2-(4-(acetamidomethyl)-3-(3,3-diisopropyltriaz-1-en-1-yl)-1*H*-pyrazol-1-yl)ethyl acetate (**9i**, 229 mg, 650  $\mu$ mol, 72% yield) as a light-brown oil.

**9i:** (*E*)-2-(4-(acetamidomethyl)-3-(3,3-diisopropyltriaz-1-en-1-yl)-1*H*-pyrazol-1-yl)ethyl acetate; Formula: C<sub>16</sub>H<sub>28</sub>N<sub>6</sub>O<sub>3</sub>; Exact Mass: 352.2223; Smiles: CC(=O)NCc1cn(nc1/N=N/N(C(C)C)C(C)C)CCOC(=O)C; InChIKey: BBXJSLXPCZXILR-CZIZESTLSA-N

$R_f$  = 0.14 (pure ethyl acetate). <sup>1</sup>H NMR (400 MHz, CDCl<sub>3</sub>, ppm)  $\delta$  = 7.20 (s, 1H), 6.06 (t,  $J$  = 5.5 Hz, 1H), 5.31 (s, 1H), 4.32 (t,  $J$  = 5.4 Hz, 2H), 4.24 (d,  $J$  = 5.5 Hz, 2H), 4.14 (t,  $J$  = 5.4 Hz, 2H), 3.92 (s, 1H), 1.93 (s, 3H), 1.84 (s, 3H), 1.25 (s, 6H), 1.13 (s, 6H); <sup>13</sup>C NMR (100 MHz, CDCl<sub>3</sub>, ppm)  $\delta$  = 170.5, 169.3, 158.1, 130.8 (+, CH), 107.2, 62.6 (–, CH<sub>2</sub>), 50.8 (–, CH<sub>2</sub>), 48.2 (+, CH), 45.2 (+, CH), 34.2 (–, CH<sub>2</sub>), 23.4 (+, CH<sub>3</sub>, 2C), 23.2 (+, CH<sub>3</sub>), 20.7 (+, CH<sub>3</sub>), 19.2 (+, CH<sub>3</sub>, 2C); MS (FAB, Matrix: 3-NBA):  $m/z$  (%) = 354 (13) [M+2H]<sup>+</sup>, 353 (62) [M+H]<sup>+</sup>, 352 (10) [M]<sup>+</sup>, 351 (11) [M-H]<sup>+</sup>, 295 (10), 294 (50), 253 (15), 252 (100), 208 (18), 182 (16); HRMS–FAB ( $m/z$ ): [M+H]<sup>+</sup> Calcd for C<sub>16</sub>H<sub>29</sub>O<sub>3</sub>N<sub>6</sub>, 353.2296; Found 353.2297; IR (ATR,  $\tilde{\nu}$ ) = 3284 (w), 3082 (vw), 2973 (w), 2932 (w), 2873 (vw), 1738 (s), 1652 (s), 1541 (m), 1419 (vs), 1364 (vs), 1227 (vs), 1153 (vs), 1128 (s), 1096 (m), 1034 (vs), 952 (w), 932 (m), 909 (m), 885 (w), 849 (w), 813 (m), 790 (m), 769 (w), 730 (m), 714 (m), 701 (m), 667 (m), 630 (m), 602 (s) cm<sup>–1</sup>.

Additional information on the chemical synthesis is available *via* Chemotion repository:

<https://doi.org/10.14272/reaction/SA-FUHFF-UHFFFADPSC-BBXJSLXPCZ-UHFFFADPSC-NUHFF-NJAI-NUHFF-ZZZ>

Additional information on the analysis of the target compound is available *via* Chemotion repository:

<https://doi.org/10.14272/BBXJSLXPCZXILR-CZIZESTLSA-N.1>

### 1-(6-Benzyl-4,6-dihydro-3*H*-pyrazolo[3,4-*d*][1,2,3]triazin-3-yl)ethan-1-one (5a)

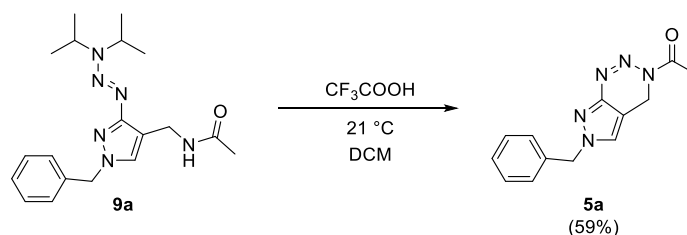

(*E*)-*N*-((1-benzyl-3-(3,3-diisopropyltriaz-1-en-1-yl)-1*H*-pyrazol-4-yl)methyl)acetamide (**9a**, 32.0 mg, 89.8  $\mu$ mol, 1.00 equiv) was dissolved in 5 mL of dry methylene chloride under nitrogen atmosphere. 2,2,2-Trifluoroacetic acid (30.7 mg, 20.6  $\mu$ L, 269  $\mu$ mol, 3.00 equiv) was added and the mixture was stirred at 21 °C for 14 hours. The reaction was diluted with 10 mL of saturated  $K_2CO_3$  solution and the aqueous phase was extracted with  $3 \times 10$  mL of methylene chloride. The combined organic layers were washed with 20 mL of brine and dried over  $Na_2SO_4$ . The solvent was removed under reduced pressure to give the crude product. The obtained crude product was purified *via* flash-chromatography on silica gel using cyclohexane/ethyl acetate 4:1 to 2:1, giving 1-(6-benzyl-4,6-dihydro-3*H*-pyrazolo[3,4-*d*][1,2,3]triazin-3-yl)ethan-1-one (**5a**, 13.5 mg, 52.9  $\mu$ mol, 59% yield) as a colorless solid.

**5a**: 1-(6-benzyl-4,6-dihydro-3*H*-pyrazolo[3,4-*d*][1,2,3]triazin-3-yl)ethan-1-one; Formula:  $C_{13}H_{13}N_5O$ ; Exact Mass: 255.1120; Smiles: CC(=O)N1N=Nc2c(C1)cn(n2)Cc1ccccc1; InChIKey: PGERMRZARQFUFX-UHFFFAOYSA-N

$R_f$  = 0.25 (cyclohexane/ethyl acetate 2:1).  $^1H$  NMR (400 MHz,  $CDCl_3$ , ppm)  $\delta$  = 7.40–7.26 (m, 5H), 7.15 (s, 1H), 5.32 (s, 2H), 4.84 (s, 2H), 2.56 (s, 3H);  $^{13}C$  NMR (100 MHz,  $CDCl_3$ , ppm)  $\delta$  = 174.3, 147.1, 135.2, 129.2 (+, CH, 2C), 128.8 (+, CH, 2C), 128.2 (+, CH, 2C), 126.1 (+, CH), 99.9, 57.1 (–,  $CH_2$ ), 39.0 (–,  $CH_2$ ), 22.3 (+,  $CH_3$ ); MS (FAB, Matrix: 3-NBA):  $m/z$  (%) = 257 (17)  $[M+2H]^+$ , 256 (82)  $[M+H]^+$ , 214 (17), 212 (12), 165 (12), 155 (19), 154 (50), 136 (46); HRMS–FAB ( $m/z$ ):  $[M+H]^+$  Calcd for  $C_{13}H_{14}ON_5$ , 256.1198; Found 256.1197; IR (ATR,  $\tilde{\nu}$ ) = 3383 (vw), 3129 (w), 3091 (vw), 3064 (vw), 3037 (vw), 3007 (vw), 2949 (vw), 2925 (vw), 2167 (vw), 1701 (vs), 1659 (vw), 1635 (vw), 1595 (vw), 1497 (vw), 1469 (s), 1456 (w), 1441 (w), 1424 (w), 1402 (w), 1368 (s), 1317 (vs), 1293 (w), 1268 (w), 1207 (m), 1160 (w), 1142 (w), 1111 (vs), 1054 (w), 1037 (w), 1004 (m), 955 (s), 878 (vs), 815 (m), 764 (w), 724 (w), 697 (vs), 680 (s), 637 (w), 618 (s), 591 (w), 577 (s), 564 (s), 518 (w), 466 (w), 458 (w)  $cm^{-1}$ .

Additional information on the chemical synthesis is available *via* Chemotion repository:

<https://doi.org/10.14272/reaction/SA-FUHFF-UHFFFADPSC-PGERMRZARQ-UHFFFADPSC-NUHFF-NUHFF-NUHFF-ZZZ.1>

Additional information on the analysis of the target compound is available *via* Chemotion repository:

<https://doi.org/10.14272/PGERMRZARQFUFX-UHFFFAOYSA-N.2>

### (6-Benzyl-4,6-dihydro-3*H*-pyrazolo[3,4-*d*][1,2,3]triazin-3-yl)(phenyl)methanone (5b)

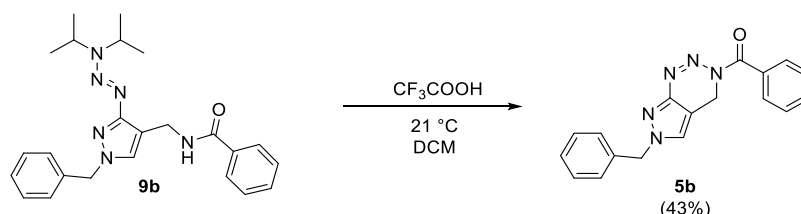

(*E*)-*N*-((1-benzyl-3-(3,3-diisopropyltriaz-1-en-1-yl)-1*H*-pyrazol-4-yl)methyl)benzamide (**9b**, 41.5 mg, 99.2  $\mu$ mol, 1.00 equiv) was dissolved in 5 mL of dry methylene chloride under nitrogen atmosphere. 2,2,2-Trifluoroacetic acid (33.9 mg, 22.8  $\mu$ L, 297  $\mu$ mol, 3.00 equiv) was added and the mixture was stirred at 21 °C for 14 hours. The reaction was diluted with 10 mL of saturated  $K_2CO_3$  solution and the aqueous phase was extracted with  $3 \times 10$  mL of methylene chloride. The combined organic layers were washed with 20 mL of brine and dried over  $Na_2SO_4$ . The solvent was removed under reduced pressure to give the crude product. The obtained crude product was

purified *via* flash-chromatography on silica gel using cyclohexane/ethyl acetate 4:1 to 2:1, giving (6-benzyl-4,6-dihydro-3*H*-pyrazolo[3,4-*d*][1,2,3]triazin-3-yl)(phenyl)methanone (**5b**, 13.6 mg, 42.9  $\mu$ mol, 43% yield) as a colorless solid.

**5b**: (6-benzyl-4,6-dihydro-3*H*-pyrazolo[3,4-*d*][1,2,3]triazin-3-yl)(phenyl)methanone; Formula:  $C_{18}H_{15}N_5O$ ; Exact Mass: 317.1277; Smiles: O=C(N1N=Nc2c(C1)cn(n2)Cc1ccccc1)c1ccccc1; InChIKey: WJOQJVSLWFMJNK-UHFFFAOYSA-N

$R_f$  = 0.31 (cyclohexane/ethyl acetate 2:1).  $^1H$  NMR (400 MHz,  $CDCl_3$ , ppm)  $\delta$  = 7.79–7.70 (m, 2H), 7.55–7.47 (m, 1H), 7.47–7.28 (m, 7H), 7.21 (s, 1H), 5.34 (s, 2H), 5.01 (s, 2H);  $^{13}C$  NMR (100 MHz,  $CDCl_3$ , ppm)  $\delta$  = 172.6, 147.2, 135.2, 133.7, 131.6 (+, CH), 130.3 (+, CH, 2C), 129.2 (+, CH, 2C), 128.8 (+, CH), 128.2 (+, CH, 2C), 128.0 (+, CH, 2C), 126.0 (+, CH), 100.3, 57.2 (–,  $CH_2$ ), 39.6 (–,  $CH_2$ ); MS (FAB, Matrix: 3-NBA):  $m/z$  (%) = 319 (11)  $[M+2H]^+$ , 318 (48)  $[M+H]^+$ , 307 (29), 292 (15), 290 (10), 289 (15), 155 (31), 154 (100), 152 (10), 139 (17), 138 (36), 137 (62), 136 (71), 124 (10), 120 (12), 107 (23), 105 (40), 97 (10), 95 (14), 91 (45), 90 (12), 89 (16); HRMS–FAB ( $m/z$ ):  $[M+H]^+$  Calcd for  $C_{18}H_{16}ON_5$ , 318.1355; Found 318.1356; IR (ATR,  $\tilde{\nu}$ ) = 3119 (w), 3030 (w), 2924 (w), 1645 (m), 1598 (w), 1575 (w), 1531 (w), 1479 (m), 1453 (m), 1448 (m), 1408 (w), 1347 (vs), 1324 (m), 1307 (m), 1289 (m), 1213 (m), 1186 (w), 1174 (w), 1157 (m), 1061 (s), 1028 (w), 1001 (m), 950 (w), 912 (s), 870 (vs), 822 (w), 792 (m), 758 (w), 698 (vs), 635 (vs), 618 (m)  $cm^{-1}$ .

Additional information on the chemical synthesis is available *via* Chemotion repository:

<https://doi.org/10.14272/reaction/SA-FUHFF-UHFFFADPSC-WJOQJVSLWF-UHFFFADPSC-NUHFF-NUHFF-NUHFF-ZZZ>

Additional information on the analysis of the target compound is available *via* Chemotion repository:

<https://doi.org/10.14272/WJOQJVSLWFMJNK-UHFFFAOYSA-N.1>

### 3-Methyl-1-(6-(4-methylbenzyl)-4,6-dihydro-3*H*-pyrazolo[3,4-*d*][1,2,3]triazin-3-yl)butan-1-one (**5c**)

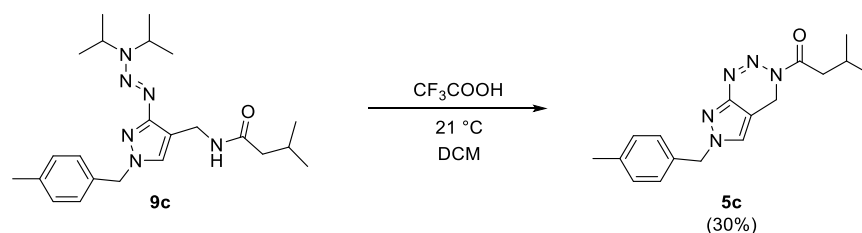

(*E*)-*N*-((3-(3,3-Diisopropyltriaz-1-en-1-yl)-1-(4-methylbenzyl)-1*H*-pyrazol-4-yl)methyl)-3-methylbutanamide (**9c**, 61.7 mg, 150  $\mu$ mol, 1.00 equiv) was dissolved in 40 mL of dry methylene chloride under nitrogen atmosphere. 2,2,2-Trifluoroacetic acid (34.1 mg, 22.9  $\mu$ L, 299  $\mu$ mol, 2.00 equiv) was added and the mixture was stirred at 21  $^{\circ}C$  for 16 hours. The reaction was diluted with 40 mL of saturated  $K_2CO_3$  solution and the aqueous phase was extracted with 3  $\times$  40 mL of methylene chloride. The combined organic layers were washed with 40 mL of brine and dried over  $Na_2SO_4$ . The solvent was removed under reduced pressure to give the crude product.

The obtained crude product was purified *via* flash-chromatography on silica gel using cyclohexane/ethyl acetate 4:1 to 1:1, giving 3-methyl-1-(6-(4-methylbenzyl)-4,6-dihydro-3*H*-pyrazolo[3,4-*d*][1,2,3]triazin-3-yl)butan-1-one (**5c**, 14.1 mg, 45.3  $\mu$ mol, 30% yield) as an off-colorless solid.

**5c**: 3-methyl-1-(6-(4-methylbenzyl)-4,6-dihydro-3*H*-pyrazolo[3,4-*d*][1,2,3]triazin-3-yl)butan-1-one; Formula:  $C_{17}H_{21}N_5O$ ; Exact Mass: 311.1746; Smiles: CC(CC(=O)N1N=Nc2c(C1)cn(n2)Cc1ccc(cc1)C)C; InChIKey: KEQOQOHNHBUGFW-UHFFFAOYSA-N

$R_f$  = 0.30 (cyclohexane/ethyl acetate 4:1).  $^1H$  NMR (400 MHz,  $CDCl_3$ , ppm)  $\delta$  = 7.23–7.15 (m, 4H), 7.12 (s, 1H), 5.27 (s, 2H), 4.82 (s, 2H), 2.86 (d,  $J$  = 7.1 Hz, 2H), 2.35 (s, 3H), 2.25 (thept,  $J$  = 13.5 Hz,  $J$  = 6.8 Hz, 1H), 0.99 (d,  $J$  = 6.6 Hz, 6H);  $^{13}C$  NMR (100MHz,  $CDCl_3$ , ppm)  $\delta$  = 176.2, 147.1, 138.8, 132.2, 129.9 (+, CH, 2C), 128.3 (+, CH, 2C), 125.9 (+, CH), 100.0, 56.9 (–,  $CH_2$ ), 43.0 (–,  $CH_2$ ), 38.9 (–,  $CH_2$ ), 25.7 (+, CH), 22.8 (+,  $CH_3$ , 2C), 21.3 (+,  $CH_3$ ); MS (FAB, Matrix: 3-NBA):  $m/z$  (%) = 313 (19)  $[M+2H]^+$ , 312 (88)  $[M+H]^+$ , 311 (6)  $[M]^+$ , 228 (22), 226 (10), 155 (13), 154 (42), 139 (11), 138 (20), 137 (29), 136 (39), 121 (10), 120 (10), 109 (14), 107 (17), 106 (14), 105 (100), 97 (17), 95 (22), 93 (10), 91 (22), 89 (12); HRMS–FAB ( $m/z$ ):  $[M+H]^+$  Calcd for  $C_{17}H_{22}ON_5$ ,

312.1819; Found 312.1821. IR (ATR,  $\tilde{\nu}$ ) = 3125 (w), 3031 (w), 3012 (w), 2956 (w), 2925 (w), 2867 (w), 2730 (vw), 1672 (vs), 1618 (vw), 1596 (w), 1514 (w), 1476 (vs), 1463 (m), 1438 (w), 1431 (w), 1405 (m), 1391 (m), 1377 (vs), 1361 (vs), 1346 (m), 1337 (m), 1317 (vs), 1312 (vs), 1288 (w), 1261 (w), 1228 (w), 1207 (s), 1167 (m), 1128 (w), 1116 (w), 1061 (vs), 1010 (vs), 946 (m), 902 (w), 875 (vs), 867 (vs), 833 (vs), 806 (s), 768 (w), 749 (vs), 725 (m), 717 (m), 680 (s), 645 (m), 637 (m), 619 (vs), 575 (vs), 564 (m), 535 (vs), 509 (w), 470 (s), 433 (w), 414 (w), 402 (w), 394 (w)  $\text{cm}^{-1}$ .

Additional information on the chemical synthesis is available *via* Chemotion repository:

<https://doi.org/10.14272/reaction/SA-FUHFF-UHFFFADPSC-KEQOQOHNHB-UHFFFADPSC-NUHFF-NUHFF-NUHFF-ZZZ>

Additional information on the analysis of the target compound is available *via* Chemotion repository:

<https://doi.org/10.14272/KEQOQOHNHBUGFW-UHFFFAOYSA-N.1>

### 1-(6-(3,5-Difluorobenzyl)-4,6-dihydro-3H-pyrazolo[3,4-d][1,2,3]triazin-3-yl)ethan-1-one (5d)

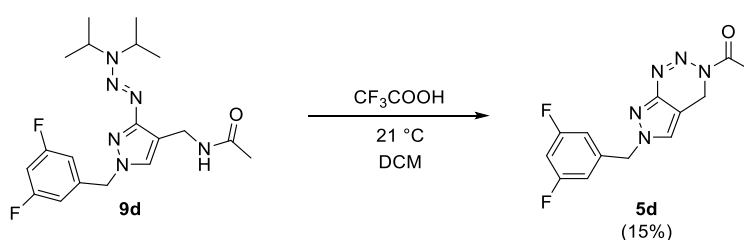

(*E*)-*N*-((1-(3,5-Difluorobenzyl)-3-(3,3-diisopropyltriaz-1-en-1-yl)-1*H*-pyrazol-4-yl)methyl)acetamide (**9d**, 12.9 mg, 32.9  $\mu\text{mol}$ , 1.00 equiv) was dissolved in 5 mL of dry methylene chloride under nitrogen atmosphere. 2,2,2-Trifluoroacetic acid (7.87 mg, 5.29  $\mu\text{L}$ , 69.0  $\mu\text{mol}$ , 2.10 equiv) was added and the mixture was stirred at 21  $^{\circ}\text{C}$  for 14 hours. The reaction was diluted with 10 mL of saturated  $\text{K}_2\text{CO}_3$  solution and the aqueous phase was extracted with  $3 \times 10$  mL of methylene chloride. The combined organic layers were washed with 20 mL of brine and dried over  $\text{Na}_2\text{SO}_4$ . The solvent was removed under reduced pressure to give the crude product.

The obtained crude product was purified *via* flash-chromatography on silica gel using cyclohexane/ethyl acetate 4:1 to 2:1, giving 1-(6-(3,5-difluorobenzyl)-4,6-dihydro-3*H*-pyrazolo[3,4-*d*][1,2,3]triazin-3-yl)ethan-1-one (**5d**, 1.40 mg, 4.81  $\mu\text{mol}$ , 15% yield) as a colorless solid.

**5d**: 1-(6-(3,5-difluorobenzyl)-4,6-dihydro-3*H*-pyrazolo[3,4-*d*][1,2,3]triazin-3-yl)ethan-1-one; Formula:  $\text{C}_{13}\text{H}_{11}\text{F}_2\text{N}_5\text{O}$ ; Exact Mass: 291.0932; Smiles: Fc1cc(cc1F)Cn1cc2c(n1)N=NN(C2)C(=O)C; InChIKey: CEFFSZUXPZAWPN-UHFFFAOYSA-N

$R_f$  = 0.27 (cyclohexane/ethyl acetate 2:1).  $^1\text{H}$  NMR (400 MHz,  $\text{CDCl}_3$ , ppm)  $\delta$  = 7.22 (s, 1H), 6.84–6.71 (m, 3H), 5.30 (s, 2H), 4.88 (s, 2H), 2.59 (s, 3H);  $^{13}\text{C}$  NMR (100 MHz,  $\text{CDCl}_3$ , ppm)  $\delta$  = 169.5, 163.3 (2C; dd,  $J$  = 249.5 Hz,  $J$  = 12.6 Hz), 158.5, 140.6 (t,  $J$  = 8.9 Hz), 130.7 (+, CH), 110.6 (+, CH, 2C; dd,  $J$  = 18.6 Hz,  $J$  = 7.2 Hz), 108.2, 103.5 (+, CH; t,  $J$  = 25.3 Hz), 55.2 (–,  $\text{CH}_2$ ; t,  $J$  = 2.3 Hz), 48.4 (+, CH), 45.5 (+, CH), 34.3 (–,  $\text{CH}_2$ ), 23.8 (+,  $\text{CH}_3$ , 2C), 23.6 (+,  $\text{CH}_3$ ), 19.5 (+,  $\text{CH}_3$ , 2C);  $^{19}\text{F}$  NMR (375 MHz,  $\text{CDCl}_3$ , ppm)  $\delta$  = –108.08; MS (FAB, Matrix: 3-NBA):  $m/z$  (%) = 293 (7)  $[\text{M}+2\text{H}]^+$ , 292 (37)  $[\text{M}+\text{H}]^+$ , 191 (11)  $[\text{M}]^+$ , 163 (10), 159 (12), 155 (21), 154 (43), 137 (30), 136 (40), 125 (20), 123 (36), 111 (48); HRMS–FAB ( $m/z$ ):  $[\text{M}+\text{H}]^+$  Calcd for  $\text{C}_{13}\text{H}_{12}\text{ON}_5\text{F}_2$ , 292.1010; Found 292.1012; IR (ATR,  $\tilde{\nu}$ ) = 3125 (w), 3102 (vw), 3041 (w), 2951 (w), 2922 (w), 2870 (w), 2853 (w), 1701 (vs), 1666 (w), 1622 (m), 1596 (vs), 1538 (vw), 1519 (vw), 1468 (vs), 1446 (s), 1443 (s), 1424 (m), 1402 (w), 1368 (s), 1344 (m), 1315 (vs), 1275 (w), 1258 (w), 1241 (w), 1205 (s), 1159 (w), 1143 (w), 1109 (vs), 1055 (m), 1038 (m), 1004 (vs), 976 (w), 955 (vs), 941 (m), 875 (vs), 856 (vs), 829 (m), 819 (s), 793 (w), 752 (w), 737 (vs), 722 (s), 671 (w), 647 (m), 619 (m)  $\text{cm}^{-1}$ .

Additional information on the chemical synthesis is available *via* Chemotion repository:

<https://doi.org/10.14272/reaction/SA-FUHFF-UHFFFADPSC-CEFFSZUXPZ-UHFFFADPSC-NUHFF-NUHFF-NUHFF-ZZZ>

Additional information on the analysis of the target compound is available *via* Chemotion repository:

<https://doi.org/10.14272/CEFFSZUXPZAWPN-UHFFFAOYSA-N.1>



### 1-(6-Ethyl-4,6-dihydro-3H-pyrazolo[3,4-d][1,2,3]triazin-3-yl)ethan-1-one (**5e**)

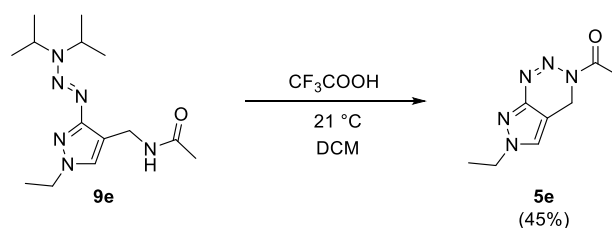

(*E*)-*N*-((3-(3,3-diisopropyltriaz-1-en-1-yl)-1-ethyl-1*H*-pyrazol-4-yl)methyl)acetamide (**9e**, 57.7 mg, 196  $\mu$ mol, 1.00 equiv) was dissolved in 20 mL of dry methylene chloride under nitrogen atmosphere. 2,2,2-Trifluoroacetic acid (67.0 mg, 45.0  $\mu$ L, 588  $\mu$ mol, 3.00 equiv) was added and the mixture was stirred at 21 °C for 16 hours. The reaction was diluted with 20 mL of saturated  $K_2CO_3$  solution and the aqueous phase was extracted with  $3 \times 20$  mL of methylene chloride. The combined organic layers were washed with 20 mL of brine and dried over  $Na_2SO_4$ . The solvent was removed under reduced pressure to give the crude product. The obtained crude product was purified *via* flash-chromatography on silica gel using cyclohexane/ethyl acetate 4:1 to 2:1, giving 1-(6-ethyl-4,6-dihydro-3*H*-pyrazolo[3,4-*d*][1,2,3]triazin-3-yl)ethan-1-one (**5e**, 16.9 mg, 87.5  $\mu$ mol, 45% yield) as colorless solid.

**5e**: 1-(6-ethyl-4,6-dihydro-3*H*-pyrazolo[3,4-*d*][1,2,3]triazin-3-yl)ethan-1-one; Formula:  $C_8H_{11}N_5O$ ; Exact Mass: 193.0964; Smiles: CCn1nc2c(c1)CN(N=N2)C(=O)C; InChIKey: AHUQBMJJIBAFGD-UHFFFAOYSA-N

$R_f$  = 0.05 (cyclohexane/ethyl acetate 4:1).  $^1H$  NMR (400 MHz,  $CDCl_3$ , ppm)  $\delta$  = 7.21 (s, 1H), 4.86 (s, 2H), 4.19 (q,  $J$  = 7.3 Hz, 2H), 2.55 (s, 3H), 1.51 (t,  $J$  = 7.3 Hz, 3H);  $^{13}C$  NMR (100 MHz,  $CDCl_3$ , ppm)  $\delta$  = 174.2, 147.0, 125.4 (+, CH), 99.1, 48.1 (–,  $CH_2$ ), 39.0 (–,  $CH_2$ ), 22.3 (+,  $CH_3$ ), 15.5 (+,  $CH_3$ ); MS (FAB, Matrix: 3-NBA):  $m/z$  (%) = 195 (13)  $[M+2H]^+$ , 194 (100)  $[M+H]^+$ , 193 (6)  $[M]^+$ , 192 (11)  $[M-H]^+$ , 154 (8), 152 (26), 150 (18), 136 (12), 133 (33), 124 (24), 123 (10), 109 (14), 107 (11), 97 (11), 96 (10), 95 (16), 93 (10), 91 (16); HRMS–FAB ( $m/z$ ):  $[M+H]^+$  Calcd for  $C_8H_{12}ON_5$ , 194.1036; Found 194.1036; IR (ATR,  $\tilde{\nu}$ ) = 3417 (w), 3363 (w), 3125 (w), 2990 (w), 2955 (w), 2915 (w), 2884 (w), 2854 (w), 2766 (w), 1687 (vs), 1628 (w), 1589 (w), 1574 (w), 1537 (w), 1475 (vs), 1421 (m), 1377 (vs), 1350 (s), 1327 (vs), 1255 (w), 1201 (s), 1173 (s), 1103 (vs), 1050 (s), 1034 (m), 1013 (s), 973 (m), 955 (vs), 875 (vs), 833 (vs), 788 (m), 754 (m), 725 (s), 652 (w), 618 (s)  $cm^{-1}$ .

Additional information on the chemical synthesis is available *via* Chemotion repository:

<https://doi.org/10.14272/reaction/SA-FUHFF-UHFFFADPSC-AHUQBMJJIB-UHFFFADPSC-NUHFF-NUHFF-NUHFF-ZZZ>

Additional information on the analysis of the target compound is available *via* Chemotion repository:

<https://doi.org/10.14272/AHUQBMJJIBAFGD-UHFFFAOYSA-N.1>

### 1-(6-Cyclopentyl-4,6-dihydro-3H-pyrazolo[3,4-d][1,2,3]triazin-3-yl)ethan-1-one (**5f**)

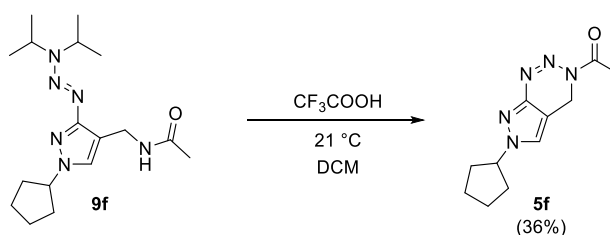

(*E*)-*N*-((1-cyclopentyl-3-(3,3-diisopropyltriaz-1-en-1-yl)-1*H*-pyrazol-4-yl)methyl)acetamide (**9f**, 116 mg, 347  $\mu$ mol, 1.00 equiv) was dissolved in 35 mL of dry methylene chloride under nitrogen atmosphere. 2,2,2-Trifluoroacetic acid (119 mg, 79.7  $\mu$ L, 1.04 mmol, 3.00 equiv) was added and the mixture was stirred at 21 °C for 16 hours. The reaction was diluted with 35 mL of saturated  $K_2CO_3$  solution and the aqueous phase was extracted with  $3 \times 35$  mL of methylene chloride. The combined organic layers were washed with 35 mL of brine and dried over  $Na_2SO_4$ . The solvent was removed under reduced pressure to give the crude product. The obtained crude product was purified *via* flash-chromatography on silica gel using cyclohexane/ethyl acetate 4:1 to 2:1, giving 1-(6-cyclopentyl-4,6-dihydro-3*H*-pyrazolo[3,4-*d*][1,2,3]triazin-3-yl)ethan-1-one (**5f**, 29.2 mg, 125  $\mu$ mol, 36% yield) as a light-brown solid.

**5f:** 1-(6-cyclopentyl-4,6-dihydro-3H-pyrazolo[3,4-d][1,2,3]triazin-3-yl)ethan-1-one; Formula: C<sub>11</sub>H<sub>15</sub>N<sub>5</sub>O; Exact Mass: 233.1277; Smiles: CC(=O)N1N=Nc2c(C1)cn(n2)C1CCCC1; InChIKey: QFPQAGCPTOKOBM-UHFFFAOYSA-N

$R_f$  = 0.21 (cyclohexane/ethyl acetate 4:1). <sup>1</sup>H NMR (400 MHz, CDCl<sub>3</sub>, ppm)  $\delta$  = 7.23 (s, 1H), 4.84 (s, 2H), 4.63 (p,  $J$  = 7.0 Hz, 1H), 2.54 (s, 3H), 2.22–2.10 (m, 2H), 2.09–1.97 (m, 2H), 1.97–1.80 (m, 2H), 1.77–1.63 (m, 2H); <sup>13</sup>C NMR (100 MHz, CDCl<sub>3</sub>, ppm)  $\delta$  = 174.2, 146.8, 124.8 (+, CH), 98.8, 64.2 (+, CH), 39.0 (–, CH<sub>2</sub>), 33.2 (–, CH<sub>2</sub>, 2C), 24.3 (–, CH<sub>2</sub>, 2C), 22.3 (+, CH<sub>3</sub>); MS (FAB, Matrix: 3-NBA):  $m/z$  (%) = 235 (14) [M+2H]<sup>+</sup>, 234 (100) [M+H]<sup>+</sup>, 233 (6) [M]<sup>+</sup>, 232 (10) [M-H]<sup>+</sup>, 192 (10), 155 (15), 154 (48), 139 (10), 138 (20), 137 (30), 136 (34), 109 (11), 107 (13), 97 (11), 95 (15), 91 (13); HRMS–FAB ( $m/z$ ): [M+H]<sup>+</sup> Calcd for C<sub>11</sub>H<sub>16</sub>ON<sub>5</sub>, 234.1349; Found 234.1350; IR (ATR,  $\tilde{\nu}$ ) = 3370 (vw), 3129 (w), 2970 (w), 2944 (w), 2921 (w), 2873 (w), 1693 (vs), 1656 (w), 1632 (w), 1591 (w), 1538 (vw), 1503 (vw), 1475 (vs), 1456 (w), 1448 (m), 1418 (w), 1374 (vs), 1357 (s), 1332 (vs), 1286 (m), 1248 (w), 1204 (s), 1176 (w), 1159 (w), 1109 (vs), 1052 (m), 1034 (m), 1004 (vs), 953 (vs), 912 (w), 877 (vs), 827 (vs), 741 (m), 722 (s), 623 (m), 594 (w), 578 (vs), 562 (vs), 537 (m), 496 (m), 470 (w), 436 (w), 418 (w), 394 (m) cm<sup>–1</sup>.

Additional information on the chemical synthesis is available *via* Chemotion repository:

<https://doi.org/10.14272/reaction/SA-FUHFF-UHFFFADPSC-QFPQAGCPTO-UHFFFADPSC-NUHFF-NUHFF-NUHFF-ZZZ>

Additional information on the analysis of the target compound is available *via* Chemotion repository:

<https://doi.org/10.14272/QFPQAGCPTOKOBM-UHFFFAOYSA-N.1>

### (6-Cyclopentyl-4,6-dihydro-3H-pyrazolo[3,4-d][1,2,3]triazin-3-yl)(phenyl)methanone (**5g**)

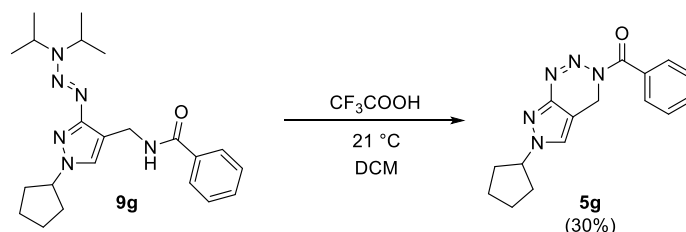

(*E*)-*N*-((1-cyclopentyl-3-(3,3-diisopropyltriaz-1-en-1-yl)-1H-pyrazol-4-yl)methyl)benzamide (**9g**, 250 mg, 631  $\mu$ mol, 1.00 equiv) was dissolved in 50 mL of dry methylene chloride under nitrogen atmosphere. 2,2,2-Trifluoroacetic acid (216 mg, 145  $\mu$ L, 1.89 mmol, 3.00 equiv) was added and the mixture was stirred at 21 °C for 16 hours. The reaction was diluted with 50 mL of saturated K<sub>2</sub>CO<sub>3</sub> solution and the aqueous phase was extracted with 3  $\times$  50 mL of methylene chloride. The combined organic layers were washed with 100 mL of brine and dried over Na<sub>2</sub>SO<sub>4</sub>. The solvent was removed under reduced pressure to give the crude product. The obtained crude product was purified *via* flash-chromatography on silica gel using cyclohexane/ethyl acetate 4:1 to 1:1, to give (6-cyclopentyl-4,6-dihydro-3H-pyrazolo[3,4-d][1,2,3]triazin-3-yl)(phenyl)methanone (**5g**, 55.4 mg, 188  $\mu$ mol, 30% yield). Comment: the reaction was stopped after 16 h, remaining starting material (136 mg) was re-isolated. Based on the consumed starting material, the yield of the reaction is 65%.

**5g:** (6-cyclopentyl-4,6-dihydro-3H-pyrazolo[3,4-d][1,2,3]triazin-3-yl)(phenyl)methanone; Formula: C<sub>16</sub>H<sub>17</sub>N<sub>5</sub>O; Exact Mass: 295.1433; Smiles: O=C(c1cccc1)N1N=Nc2c(C1)cn(n2)C1CCCC1; InChIKey: JUJUWBLNYJZJO-UHFFFAOYSA-N

$R_f$  = 0.47 (cyclohexane/ethyl acetate 2:1). <sup>1</sup>H NMR (400 MHz, Chloroform-d [7.27 ppm], ppm)  $\delta$  = 7.75–7.73 (m, 2H), 7.53–7.48 (m, 1H), 7.45–7.41 (m, 2H), 7.29 (s, 1H), 5.03 (s, 2H), 4.67 (t,  $J$  = 7.1 Hz, 1H), 2.22–2.15 (m, 2H), 2.11–2.03 (m, 2H), 1.94–1.86 (m, 2H), 1.77–1.70 (m, 2H); <sup>13</sup>C NMR (100 MHz, Chloroform-d [77.0 ppm], ppm)  $\delta$  = 172.5, 146.9, 133.8, 131.4 (+, CH), 130.2 (+, CH, 2C), 127.9 (+, CH, 2C), 124.6 (+, CH), 99.2, 64.1 (+, CH), 39.5 (–, CH<sub>2</sub>), 33.2 (–, CH<sub>2</sub>, 2C), 24.2 (–, CH<sub>2</sub>, 2C); MS (EI, 70 eV),  $m/z$  (%): 296 (61), 270 (67), 154 (62), 149 (33), 137 (43), 136 (58), 105 (100), 95 (38). IR (ATR,  $\tilde{\nu}$ ) = 3114 (w), 2953 (w), 2876 (w), 1677 (s), 1663 (vs), 1448 (m), 1341 (vs), 1315 (s), 1207 (m), 1068 (vs), 904 (s), 871 (vs), 826 (vs), 783 (m), 714 (vs), 700 (vs), 693 (vs), 636 (s), 601 (vs) cm<sup>–1</sup>.

Additional information on the chemical synthesis is available *via* Chemotion repository:

<https://doi.org/10.14272/reaction/SA-FUHFF-UHFFFADPSC-JUJUWEBLNY-UHFFFADPSC-NUHFF-NUHFF-NUHFF-ZZZ>

Additional information on the analysis of the target compound is available *via* Chemotion repository:

<https://doi.org/10.14272/JUJUWEBLNYJZJO-UHFFFAOYSA-N.1>

### 1-(6-Isobutyl-4,6-dihydro-3H-pyrazolo[3,4-*d*][1,2,3]triazin-3-yl)ethan-1-one (**5h**)

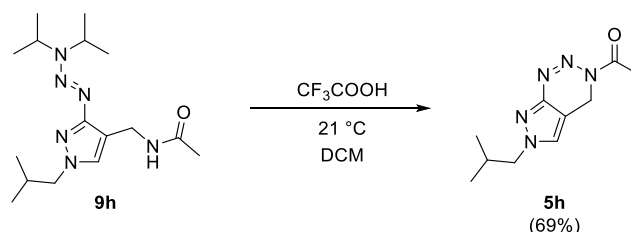

*N*-((3-(3,3-diisopropyltriaz-1-en-1-yl)-1-isobutyl-1*H*-pyrazol-4-yl)methyl)acetamide (**9h**, 95.4 mg, 296  $\mu$ mol, 1.00 equiv) was dissolved in 10 mL of dry methylene chloride under nitrogen atmosphere. 2,2,2-Trifluoroacetic acid (101 mg, 68.0  $\mu$ L, 888  $\mu$ mol, 3.00 equiv) was added and the mixture was stirred at 21  $^{\circ}$ C for 14 hours. The reaction was diluted with 10 mL of saturated  $K_2CO_3$  solution and the aqueous phase was extracted with  $3 \times 10$  mL of methylene chloride. The combined organic layers were washed with 20 mL of brine and dried over  $Na_2SO_4$ . The solvent was removed under reduced pressure to give the crude product. The obtained crude product was purified *via* flash-chromatography on silica gel using cyclohexane/ethyl acetate 4:1 to 2:1, giving 1-(6-isobutyl-4,6-dihydro-3*H*-pyrazolo[3,4-*d*][1,2,3]triazin-3-yl)ethan-1-one (**5h**, 45.1 mg, 204  $\mu$ mol, 69% yield) as a colorless solid.

**5h**: 1-(6-isobutyl-4,6-dihydro-3*H*-pyrazolo[3,4-*d*][1,2,3]triazin-3-yl)ethan-1-one; Formula:  $C_{10}H_{15}N_5O$ ; Exact Mass: 221.1277; Smiles: CC(Cn1cc2c(n1)N=NN(C2)C(=O)C)C; InChIKey: WDXQCIDOHPSJHM-UHFFFAOYSA-N

$R_f$  = 0.17 (cyclohexane/ethyl acetate 4:1).  $^1H$  NMR (400 MHz,  $CDCl_3$ , ppm)  $\delta$  = 7.16 (s, 1H), 4.86 (s, 2H), 3.91 (d,  $J$  = 7.3 Hz, 2H), 2.55 (s, 3H), 2.23 (hept,  $J$  = 7.3 Hz,  $J$  = 6.8 Hz, 1H), 0.91 (d,  $J$  = 6.7 Hz, 6H);  $^{13}C$  NMR (100 MHz,  $CDCl_3$ , ppm)  $\delta$  = 174.2, 147.0, 126.5 (+, CH), 98.9, 60.6 (–,  $CH_2$ ), 39.0 (–,  $CH_2$ ), 29.7 (+, CH), 22.3 (+,  $CH_3$ ), 19.9 (+,  $CH_3$ , 2C); MS (FAB, Matrix: 3-NBA):  $m/z$  (%) = 222 (42)  $[M+H]^+$ , 196 (82), 194 (72), 192 (22), 178 (26), 167 (34), 166 (24), 165 (26), 153 (25), 152 (57), 151 (38), 150 (22), 137 (100), 136 (35), 135 (24), 133 (59), 121 (25), 109 (23), 108 (22), 107 (24), 97 (23), 96 (36), 95 (34), 93 (24), 91 (29); HRMS–FAB ( $m/z$ ):  $[M+H]^+$  Calcd for  $C_{10}H_{16}ON_5$ , 222.1355; Found 222.1353; IR (ATR,  $\tilde{\nu}$ ) = 3265 (w), 3057 (w), 2961 (m), 2934 (w), 2873 (w), 1655 (vs), 1541 (vs), 1466 (vs), 1434 (vs), 1405 (s), 1390 (vs), 1370 (vs), 1271 (vs), 1221 (s), 1162 (vs), 1115 (s), 1091 (s), 1020 (s), 992 (s), 946 (m), 926 (m), 894 (m), 849 (s), 819 (s), 769 (s), 732 (vs), 700 (vs), 662 (s), 619 (s), 594 (vs), 540 (s), 489 (s), 435 (m), 409 (m), 398 (m)  $cm^{-1}$ .

Additional information on the chemical synthesis is available *via* Chemotion repository:

<https://doi.org/10.14272/reaction/SA-FUHFF-UHFFFADPSC-WDXQCIDOHPSJHM-UHFFFADPSC-NUHFF-NUHFF-NUHFF-ZZZ>

Additional information on the analysis of the target compound is available *via* Chemotion repository:

<https://doi.org/10.14272/WDXQCIDOHPSJHM-UHFFFAOYSA-N.1>

### 2-(3-Acetyl-3,4-dihydro-6*H*-pyrazolo[3,4-*d*][1,2,3]triazin-6-yl)ethyl acetate (**5i**)

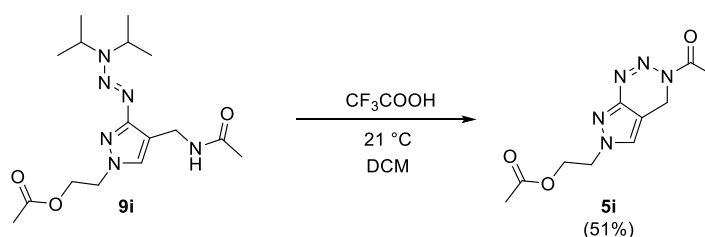

(*E*)-2-(4-(Acetamidomethyl)-3-(3,3-diisopropyltriaz-1-en-1-yl)-1*H*-pyrazol-1-yl)ethyl acetate (**9i**, 136 mg, 385  $\mu$ mol, 1.00 equiv) was dissolved in 40 mL of dry methylene chloride under nitrogen atmosphere. 2,2,2-Trifluoroacetic acid (132 mg, 88.5  $\mu$ L, 1.16 mmol, 3.00 equiv) was added and the mixture was stirred at 21 °C for 16 hours. The reaction was diluted with 40 mL of saturated K<sub>2</sub>CO<sub>3</sub> solution and the aqueous phase was extracted with 3  $\times$  40 mL of methylene chloride. The combined organic layers were washed with 40 mL of brine and dried over Na<sub>2</sub>SO<sub>4</sub>. The solvent was removed under reduced pressure to give the crude product. The obtained crude product was purified *via* flash-chromatography on silica gel using cyclohexane/ethyl acetate 4:1 to 1:1, giving 2-(3-acetyl-3,4-dihydro-6*H*-pyrazolo[3,4-*d*][1,2,3]triazin-6-yl)ethyl acetate (**5i**, 49.5 mg, 197  $\mu$ mol, 51% yield) as a colorless solid.

**5i**: 2-(3-acetyl-3,4-dihydro-6*H*-pyrazolo[3,4-*d*][1,2,3]triazin-6-yl)ethyl acetate; Formula: C<sub>10</sub>H<sub>13</sub>N<sub>5</sub>O<sub>3</sub>; Exact Mass: 251.1018; Smiles: CC(=O)OCCn1nc2c(c1)CN(N=N2)C(=O)C; InChIKey: KPRSIIAWIWZXCG-UHFFFAOYSA-N

*R<sub>f</sub>* = 0.17 (cyclohexane/ethyl acetate 4:1). <sup>1</sup>H NMR (400 MHz, CDCl<sub>3</sub>, ppm)  $\delta$  = 7.25 (s, 1H), 4.86 (s, 2H), 4.45 (t, *J* = 5.2 Hz, 2H), 4.37 (t, *J* = 5.4 Hz, 2H), 2.55 (s, 3H), 2.03 (s, 3H); <sup>13</sup>C NMR (100 MHz, CDCl<sub>3</sub>, ppm)  $\delta$  = 174.2, 170.5, 147.4, 126.9 (+, CH), 99.5, 62.5 (–, CH<sub>2</sub>), 51.9 (–, CH<sub>2</sub>), 38.9 (–, CH<sub>2</sub>), 22.2 (+, CH<sub>3</sub>), 20.8 (+, CH<sub>3</sub>); MS (FAB, Matrix: 3-NBA): *m/z* (%) = 253 (13) [M+2H]<sup>+</sup>, 252 (100) [M+H]<sup>+</sup>, 251 (5) [M]<sup>+</sup>, 155 (16), 154 (52), 138 (20), 137 (35), 136 (38), 107 (13), 89 (10); HRMS–FAB (*m/z*): [M+H]<sup>+</sup> Calcd for C<sub>10</sub>H<sub>14</sub>O<sub>3</sub>N<sub>5</sub>, 252.1091; Found 252.1093; IR (ATR,  $\tilde{\nu}$ ) = 3459 (vw), 3376 (vw), 3122 (w), 2992 (vw), 2968 (vw), 2953 (vw), 2925 (vw), 2887 (vw), 2851 (vw), 1871 (vw), 1745 (s), 1734 (vs), 1697 (vs), 1657 (w), 1589 (vw), 1574 (vw), 1476 (s), 1460 (w), 1436 (w), 1422 (w), 1409 (w), 1371 (vs), 1368 (vs), 1347 (w), 1327 (vs), 1313 (s), 1276 (w), 1254 (w), 1234 (vs), 1204 (s), 1188 (m), 1162 (m), 1128 (w), 1102 (vs), 1050 (s), 1038 (vs), 1013 (s), 996 (w), 972 (w), 956 (vs), 936 (s), 868 (vs), 827 (s), 738 (w), 725 (w), 659 (m), 635 (w), 611 (vs) cm<sup>–1</sup>.

Additional information on the chemical synthesis is available *via* Chemotion repository:

<https://doi.org/10.14272/reaction/SA-FUHFF-UHFFFADPSC-KPRSIIAWIW-UHFFFADPSC-NUHFF-NUHFF-NUHFF-ZZZ>

Additional information on the analysis of the target compound is available *via* Chemotion repository:

<https://doi.org/10.14272/KPRSIIAWIWZXCG-UHFFFAOYSA-N.1>

### 3. Amidation of triazenes 13

**Table S1:** Synthesis of amides **10** via reduction of nitriles **13** to pyrazolo-ortho-methylamines **18** and subsequent conversion with aliphatic anhydrides or chlorides **11**.

| Entry <sup>a</sup> | 13         | R <sup>1</sup>         | 18         | 11         | 10         | R <sup>2</sup> | Yield 10 (%) |
|--------------------|------------|------------------------|------------|------------|------------|----------------|--------------|
| 1                  | <b>13a</b> | Bn                     | <b>18a</b> | <b>11d</b> | <b>10a</b> | Me             | 40 (from 13) |
| 2                  | <b>13b</b> | -CH <sub>2</sub> tolyl | <b>18b</b> | <b>11a</b> | <b>10c</b> | Me             | 77 (from 17) |
| 3                  | <b>13f</b> | <sup>i</sup> Bu        | <b>18c</b> | <b>11a</b> | <b>10h</b> | Me             | 88 (from 17) |
| 4                  | <b>13f</b> | <sup>i</sup> Bu        | <b>18c</b> | <b>11b</b> | <b>10i</b> | Ph             | 88 (from 17) |

**11a** = Acetic anhydride, **11b** = Benzoyl anhydride, **11d** = Acetyl chloride

#### (*E*)-*N*-((1-Benzyl-5-(3,3-diisopropyltriaz-1-en-1-yl)-1*H*-pyrazol-4-yl)methyl)acetamide (**10a**)

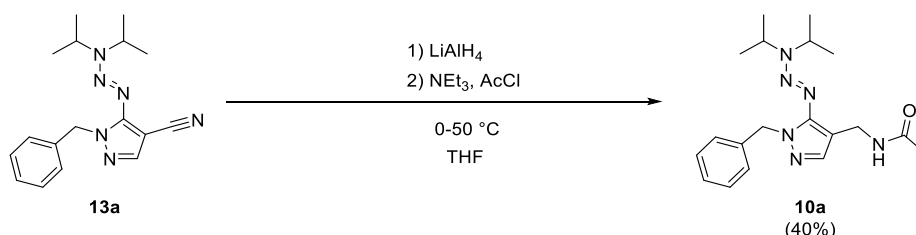

Step1: (*E*)-1-benzyl-5-(3,3-diisopropyltriaz-1-en-1-yl)-1*H*-pyrazole-4-carbonitrile (**13a**, 120 mg, 385  $\mu$ mol, 1.00 equiv) was dissolved in 40 mL of dry THF under nitrogen atmosphere. The solution was cooled to 0 °C before lithium aluminum hydride (43.9 mg, 1.16 mL, 1.16 mmol, 3.00 equiv) was slowly added. The cooling was removed and the solution was stirred at 21 °C for 14 hours, then additional 5 hours at 50 °C. The solution was cooled to 21 °C and the reaction was quenched with a saturated K/Na-tartrate solution (40 mL). The organic solvent was removed under reduced pressure and the remaining aqueous phase was extracted with methylene chloride (3  $\times$  40 mL). The combined organic layers were washed with brine (100 mL) and dried over Na<sub>2</sub>SO<sub>4</sub>. The solvent was removed under reduced pressure to give the crude (*E*)-(1-benzyl-3-(3,3-diisopropyltriaz-1-en-1-yl)-1*H*-pyrazol-4-yl)methanamine (**18a**), which was used for the next step without further purification.

Step 2: The crude (*E*)-(1-benzyl-3-(3,3-diisopropyltriaz-1-en-1-yl)-1*H*-pyrazol-4-yl)methanamine (**18a**) was dissolved in 40 mL of dry THF under nitrogen atmosphere. Triethylamine (117 mg, 161  $\mu$ L, 1.16 mmol, 3.00 equiv) was added and the solution was cooled to 0 °C before acetyl chloride (45.4 mg, 41.1  $\mu$ L, 578  $\mu$ mol, 1.50 equiv) was added dropwise. The cooling was removed and the solution was stirred for 14 hours at 21 °C. The reaction was quenched with a saturated K<sub>2</sub>CO<sub>3</sub> solution (40 mL) and the organic solvent was removed under reduced pressure. The remaining aqueous phase was extracted with methylene chloride (3  $\times$  40 mL). The combined organic layers were washed with brine (100 mL) and dried over Na<sub>2</sub>SO<sub>4</sub>. The solvent was removed under reduced pressure to give the crude product. The obtained crude product was purified *via* flash-chromatography on silica gel using methylene chloride/methanol 50:1 to 30:1, giving (*E*)-*N*-((1-benzyl-3-(3,3-diisopropyltriaz-1-en-1-yl)-1*H*-pyrazol-4-yl)methyl)acetamide (**10a**, 55.2 mg, 155  $\mu$ mol, 40% yield) as a brown oil.

**10a:** (*E*)-*N*-((1-benzyl-5-(3,3-diisopropyltriaz-1-en-1-yl)-1*H*-pyrazol-4-yl)methyl)acetamide; Formula: C<sub>19</sub>H<sub>28</sub>N<sub>6</sub>O; Exact Mass: 356.2325; Smiles: CC(=O)NCc1cnn(c1/N=N/N(C(C)C)C(C)C)Cc1ccccc1  
InChIKey: MPRWSIYLAUTZRJ-GHVJWSGMSA-N

$R_f = 0.06$  (cyclohexane/ethyl acetate 2:1).  $^1\text{H}$  NMR (400 MHz,  $\text{CDCl}_3$ , ppm)  $\delta = 7.33\text{--}7.23$  (m, 5H), 7.20 (s, 1H), 5.96 (t,  $J = 5.4$  Hz, 1H), 5.40 (s, 1H), 5.16 (s, 2H), 4.29 (d,  $J = 5.3$  Hz, 2H), 3.99 (s, 1H), 1.89 (s, 3H), 1.32 (s, 6H), 1.20 (s, 6H);  $^{13}\text{C}$  NMR (100 MHz,  $\text{CDCl}_3$ , ppm)  $\delta = 169.4$ , 157.9, 136.3, 130.2 (+, CH), 128.8 (+, CH, 2C), 128.1 (+, CH), 128.1 (+, CH, 2C), 107.5, 56.2 (–,  $\text{CH}_2$ ), 48.3 (+,  $\text{CH}_3$ ), 45.3 (+,  $\text{CH}_3$ ), 34.4 (–,  $\text{CH}_2$ ), 23.6 (+,  $\text{CH}_3$ , 2C), 23.5 (+,  $\text{CH}_3$ ), 19.4 (+,  $\text{CH}_3$ , 2C); MS (FAB, Matrix: 3-NBA):  $m/z$  (%) = 358 (22)  $[\text{M}+2\text{H}]^+$ , 357 (100)  $[\text{M}+\text{H}]^+$ , 356 (21)  $[\text{M}]^+$ , 355 (13)  $[\text{M}-\text{H}]^+$ , 298 (31), 257 (12), 256 (79), 100 (13), 91 (60); HRMS–FAB ( $m/z$ ):  $[\text{M}+\text{H}]^+$  Calcd for  $\text{C}_{19}\text{H}_{29}\text{ON}_6$ , 357.2403; Found 357.2402; IR (ATR,  $\tilde{\nu}$ ) = 3285 (w), 3080 (vw), 3065 (vw), 3033 (vw), 2973 (w), 2931 (w), 2871 (vw), 2228 (vw), 1650 (s), 1543 (m), 1497 (w), 1465 (m), 1455 (s), 1419 (vs), 1402 (vs), 1364 (vs), 1341 (s), 1244 (vs), 1224 (vs), 1150 (vs), 1128 (s), 1096 (m), 1033 (s), 1011 (m), 969 (w), 909 (m), 851 (w), 841 (w), 813 (w), 727 (vs), 704 (vs), 643 (m), 630 (w)  $\text{cm}^{-1}$ .

Additional information on the chemical synthesis is available via Chemotion repository:

<https://doi.org/10.14272/reaction/SA-FUHFF-UHFFFADPSC-MPRWSIYLAU-UHFFFADPSC-NUHFF-NOHLW-NUHFF-ZZZ>

Additional information on the analysis of the target compound is available via Chemotion repository:

<https://doi.org/10.14272/MPRWSIYLAUTZRJ-GHVJWSGMSA-N.1>

### (*E*)-(5-(3,3-Diisopropyltriaz-1-en-1-yl)-1-(4-methylbenzyl)-1*H*-pyrazol-4-yl)methanamine (**18b**)

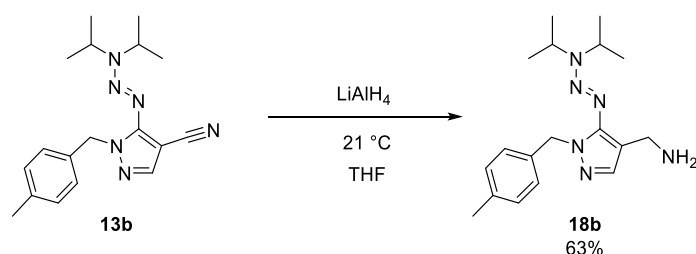

(*E*)-5-(3,3-diisopropyltriaz-1-en-1-yl)-1-(4-methylbenzyl)-1*H*-pyrazole-4-carbonitrile (**13b**, 177 mg, 545  $\mu\text{mol}$ , 1.00 equiv) was dissolved in dry THF under nitrogen-atmosphere. The solution was cooled to 0 °C before lithium aluminum hydride (70.2 mg, 1.85 mL, 1.85 mmol, 3.39 equiv) was added. The cooling was removed and the solution was stirred at 21 °C for 14 hours. The reaction was quenched with K/Na-tartrate solution and the aqueous layer was extracted with DCM. The organic solvent was removed in vacuo and (*E*)-(5-(3,3-diisopropyltriaz-1-en-1-yl)-1-(4-methylbenzyl)-1*H*-pyrazol-4-yl)methanamine (**18b**, 113 mg, 345  $\mu\text{mol}$ , 63% yield) was obtained.

**18b:** (*E*)-(5-(3,3-diisopropyltriaz-1-en-1-yl)-1-(4-methylbenzyl)-1*H*-pyrazol-4-yl)methanamine; Formula:  $\text{C}_{18}\text{H}_{28}\text{N}_6$ ; Exact Mass: 328.2375; Smiles: NCc1cnn(c1/N=N/N(C(C)C)C(C)C)Cc1ccc(cc1)C  
InChIKey: QQBXWZPQDCVAGS-QURGRASLSA-N

$^1\text{H}$  NMR (400 MHz, Chloroform- $d$  [7.27 ppm], ppm)  $\delta = 7.20\text{--}7.18$  (m, 2H), 7.14–7.12 (m, 3H), 5.44 (s, 1H), 5.16 (s, 2H), 3.98 (s, 1H), 3.73 (s, 2H), 2.32 (s, 3H), 2.03 (s, 2H), 1.35 (bs, 6H), 1.22 (bs, 6H).  $^{13}\text{C}$  NMR (100 MHz,  $\text{CDCl}_3$ , ppm)  $\delta = 157.6$ , 137.8, 133.6, 129.5 (+, CH, 2C), 128.7 (+, CH), 128.2 (+, CH, 2C), 113.4, 55.9 (–,  $\text{CH}_2$ ), 48.4 (+, CH), 45.1 (+, CH), 37.2 (–,  $\text{CH}_2$ ), 23.7 (+,  $\text{CH}_3$ , 2C), 21.2 (+,  $\text{CH}_3$ ), 19.5 (+,  $\text{CH}_3$ , 2C); MS (FAB, Matrix: 3-NBA):  $m/z$  (%) = 329 (10)  $[\text{M}+\text{H}]^+$ , 328 (4)  $[\text{M}]^+$ , 313 (19), 312 (91), 228 (25), 105 (100); HRMS–FAB ( $m/z$ ):  $[\text{M}+\text{H}]^+$  Calcd for  $\text{C}_{18}\text{H}_{29}\text{N}_6$ , 329.2454; Found 329.2453; IR (ATR,  $\tilde{\nu}$ ) = 2972 (m), 2928 (m), 2867 (w), 1558 (w), 1516 (w), 1465 (m), 1421 (vs), 1402 (vs), 1380 (m), 1363 (vs), 1237 (vs), 1180 (m), 1150 (vs), 1126 (s), 1098 (m), 1033 (s), 1009 (m), 925 (w), 908 (w), 878 (w), 824 (m), 816 (m), 792 (m), 752 (m), 738 (m), 720 (w), 558 (w), 523 (w), 475 (w)  $\text{cm}^{-1}$ .

Additional information on the chemical synthesis is available via Chemotion repository:

<https://doi.org/10.14272/reaction/SA-FUHFF-UHFFFADPSC-KQBWXZPQDC-UHFFFADPSC-NUHFF-NBDJD-NUHFF-ZZZ>

Additional information on the analysis of the target compound is available via Chemotion repository:

<https://doi.org/10.14272/KQBWXZPQDCVAGS-QURGRASLSA-N.1>

<https://dx.doi.org/10.14272/KQBWXZPQDCVAGS-QURGRASLSA-N.2>

**(*E*)-*N*-((5-(3,3-Diisopropyltriaz-1-en-1-yl)-1-(4-methylbenzyl)-1*H*-pyrazol-4-yl)methyl)acetamide (**10c**)**

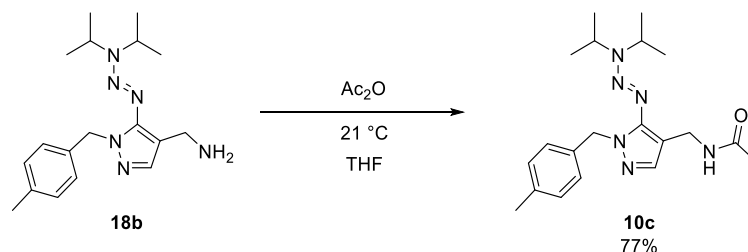

To a solution of (*E*)-5-(3,3-diisopropyltriaz-1-en-1-yl)-1-(4-methylbenzyl)-1*H*-pyrazol-4-ylmethanamine (**18b**, 90.5 mg, 276  $\mu$ mol, 1.00 equiv) in THF (2.8 mL), acetic anhydride (56.3 mg, 52.1  $\mu$ L, 551  $\mu$ mol, 2.00 equiv) were added at 21 °C. The mixture was stirred at room temperature. After 14 hours, 2 mL of a 2M NaOH solution were added and the organic solvent was removed under reduced pressure. The remaining aqueous layer was extracted with methylene chloride. The combined organic layers were washed with a saturated NaHCO<sub>3</sub> solution and brine, dried over MgSO<sub>4</sub> and the solvent was removed under reduced pressure. The obtained crude product was purified *via* flash-chromatography on silica gel using methylene chloride/methanol 50:1 to 30:1, to give (*E*)-*N*-((5-(3,3-diisopropyltriaz-1-en-1-yl)-1-(4-methylbenzyl)-1*H*-pyrazol-4-yl)methyl)acetamide (**10c**, 78.8 mg, 213  $\mu$ mol, 77% yield) as a colorless oil.

**10c:** (*E*)-*N*-((5-(3,3-diisopropyltriaz-1-en-1-yl)-1-(4-methylbenzyl)-1*H*-pyrazol-4-yl)methyl)acetamide; Formula: C<sub>20</sub>H<sub>30</sub>N<sub>6</sub>O; Exact Mass: 370.2481; Smiles: CC(=O)NCc1cnn(c1/N=N/N(C(C)C)C(C)C)Cc1ccc(cc1)C  
InChIKey: AATCYLWHXDDRIG-WCWDXBQESA-N

$R_f$  = 0.06 (cyclohexane/ethyl acetate 2:1). <sup>1</sup>H NMR (400 MHz, CDCl<sub>3</sub>, ppm)  $\delta$  = 7.20–7.03 (m, 5H), 5.95 (br.t,  $J$  = 5.4 Hz, 1H), 5.40 (br.s, 1H), 5.10 (s, 2H), 4.27 (d,  $J$  = 5.4 Hz, 2H), 3.97 (br.s, 1H), 2.29 (s, 3H), 1.87 (s, 3H), 1.31 (br.s, 6H), 1.20 (br.s, 6H); <sup>13</sup>C NMR (100 MHz, CDCl<sub>3</sub>, ppm)  $\delta$  = 169.2, 157.8, 137.8, 133.2, 129.9 (+, CH), 129.4 (+, CH, 2C), 128.1 (+, CH, 2C), 107.4, 55.9 (–, CH<sub>2</sub>), 48.2 (+, CH), 45.2 (+, CH), 34.3 (–, CH<sub>2</sub>), 23.6 (+, CH<sub>3</sub>, 2C), 23.4 (+, CH<sub>3</sub>), 21.1 (+, CH<sub>3</sub>), 19.3 (+, CH<sub>3</sub>, 2C); MS (FAB, Matrix: 3-NBA):  $m/z$  (%) = 372 (13) [M+2H]<sup>+</sup>, 371 (53) [M+H]<sup>+</sup>, 370 (9) [M]<sup>+</sup>, 312 (21), 270 (48), 106 (11), 105 (100), 100 (13), 95 (10); HRMS–FAB ( $m/z$ ): [M+H]<sup>+</sup> Calcd for C<sub>20</sub>H<sub>31</sub>ON<sub>6</sub>, 371.2559; Found 371.2558; IR (ATR,  $\tilde{\nu}$ ) = 3284 (w), 3085 (vw), 3053 (vw), 2973 (m), 2929 (w), 2870 (w), 1650 (vs), 1541 (m), 1516 (m), 1421 (vs), 1364 (vs), 1244 (vs), 1225 (vs), 1150 (vs), 1128 (s), 1096 (m), 1033 (s), 1010 (m), 921 (w), 911 (m), 796 (s), 751 (w), 728 (vs), 643 (w), 594 (w), 558 (w), 524 (w), 469 (m) cm<sup>–1</sup>.

Additional information on the chemical synthesis is available *via* Chemotion repository:

<https://doi.org/10.14272/reaction/SA-FUHFF-UHFFFADPSC-AATCYLWHXD-UHFFFADPSC-NUHFF-NWIMK-NUHFF-ZZZ>

Additional information on the analysis of the target compound is available *via* Chemotion repository:

<https://doi.org/10.14272/AATCYLWHXDDRIG-WCWDXBQESA-N.1>

**(*E*)-5-(3,3-Diisopropyltriaz-1-en-1-yl)-1-isobutyl-1*H*-pyrazol-4-ylmethanamine (**18c**)**

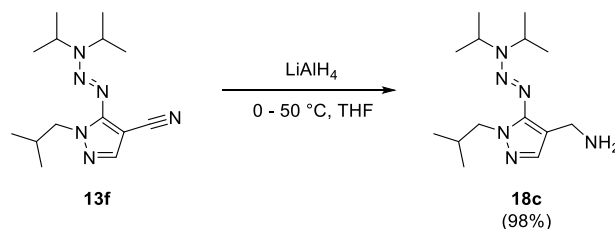

(*E*)-5-(3,3-diisopropyltriaz-1-en-1-yl)-1-isobutyl-1*H*-pyrazole-4-carbonitrile (**13f**, 245 mg, 885  $\mu$ mol, 1.00 equiv) was dissolved in 26 mL of dry THF under nitrogen-atmosphere. The solution was cooled to 0 °C before lithium aluminum hydride (101 mg, 2.65 mL, 2.65 mmol, 3.00 equiv) was added. The cooling was removed and the solution was stirred at 21 °C for 14 hours, then additional 5 hours at 50 °C. The reaction was quenched with K/Nar-tartrate solution, THF was removed under reduced pressure and the remaining aqueous layer was extracted with

CH<sub>2</sub>Cl<sub>2</sub> (3 × 25 mL). The combined organic layers were washed with brine and dried over MgSO<sub>4</sub>. The solvent was removed under reduced pressure to give (*E*)-(5-(3,3-diisopropyltriaz-1-en-1-yl)-1-isobutyl-1*H*-pyrazol-4-yl)methanamine (**18c**, 243 mg, 866 μmol, 98% yield) as crude product which was used without further purification.

**18c:** (*E*)-(5-(3,3-diisopropyltriaz-1-en-1-yl)-1-isobutyl-1*H*-pyrazol-4-yl)methanamine; Formula: C<sub>14</sub>H<sub>28</sub>N<sub>6</sub>; Exact Mass: 280.2375; Smiles: NCc1cnn(c1/N=N/N(C(C)C)C(C)C)CC(C)C  
InChIKey: SGMNZUYLCBPNEE-ISLYRVAYSA-N

<sup>1</sup>H NMR (400 MHz, CDCl<sub>3</sub>, ppm) δ = 7.30 (s, 1H), 5.08 (br.s, 1H), 4.11–3.91 (m, 3H), 3.70 (s, 2H), 2.20 (hept, *J* = 6.7 Hz, 1H), 1.64 (br.s, 2H), 1.35 (br.s, 6H), 1.26 (br.s, 6H), 0.88 (d, *J* = 6.7 Hz, 6H); <sup>13</sup>C NMR (100 MHz, CDCl<sub>3</sub>, ppm) δ = 146.9, 137.7 (+, CH), 109.9, 55.7 (–, CH<sub>2</sub>), 49.5 (+, CH), 46.6 (+, CH), 37.4 (–, CH<sub>2</sub>), 29.7 (+, CH), 23.6 (+, CH<sub>3</sub>, 2C), 20.3 (+, CH<sub>3</sub>, 2C), 19.2 (+, CH<sub>3</sub>, 2C); MS (FAB, Matrix: 3-NBA): *m/z* (%) = 282 (13) [M+2H]<sup>+</sup>, 281 (69) [M+H]<sup>+</sup>, 280 (6) [M]<sup>+</sup>, 265 (17), 264 (100), 115 (13), 109 (18), 107 (13), 105 (11), 97 (20), 96 (17), 95 (32), 93 (17), 91 (21); HRMS–FAB (*m/z*): [M+H]<sup>+</sup> Calcd for C<sub>14</sub>H<sub>29</sub>N<sub>6</sub>, 281.2454; Found 281.2453; IR (ATR,  $\tilde{\nu}$ ) = 3370 (vw), 2966 (m), 2931 (m), 2870 (w), 1632 (w), 1585 (w), 1550 (w), 1465 (s), 1411 (vs), 1363 (vs), 1315 (m), 1298 (m), 1259 (s), 1238 (vs), 1225 (vs), 1159 (vs), 1125 (s), 1096 (s), 1060 (m), 1018 (vs), 945 (m), 924 (m), 907 (s), 892 (s), 877 (s), 846 (s), 820 (m), 785 (m), 735 (m), 717 (m), 694 (m), 656 (m) cm<sup>–1</sup>.

Additional information on the chemical synthesis is available *via* Chemotion repository:

<https://doi.org/10.14272/reaction/SA-FUHFF-UHFFFADPSC-SGMNZUYLCB-UHFFFADPSC-NUHFF-NBSLK-NUHFF-ZZZ>

Additional information on the analysis of the target compound is available *via* Chemotion repository:

<https://doi.org/10.14272/SGMNZUYLCBPNEE-ISLYRVAYSA-N.1>

### (*E*)-*N*-((5-(3,3-Diisopropyltriaz-1-en-1-yl)-1-isobutyl-1*H*-pyrazol-4-yl)methyl)acetamide (**10h**)

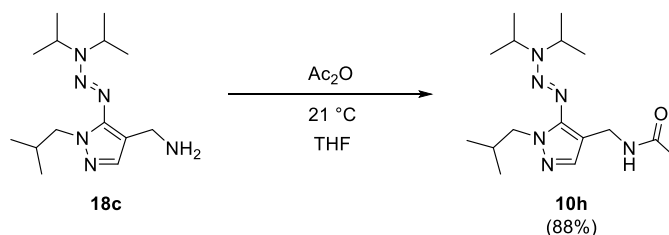

To a solution of (*E*)-(5-(3,3-diisopropyltriaz-1-en-1-yl)-1-isobutyl-1*H*-pyrazol-4-yl)methanamine (**18c**, 117 mg, 418 μmol, 1.00 equiv) in 4.45 mL of THF, acetic anhydride (85.3 mg, 79.0 μL, 836 μmol, 2.00 equiv) was added at 21 °C. The mixture was stirred at 21 °C. After 14 hours, 2 mL of a 2 M NaOH solution were added and the organic solvent was removed under reduced pressure. The remaining aqueous layer was extracted with methylene chloride (3 × 10 mL). The combined organic layers were washed with a saturated NaHCO<sub>3</sub> solution and brine, dried over MgSO<sub>4</sub> and the solvent was removed under reduced pressure. The obtained crude product was purified *via* flash-chromatography on silica gel using methylene chloride/methanol 50:1 to 20:1, giving (*E*)-*N*-((5-(3,3-diisopropyltriaz-1-en-1-yl)-1-isobutyl-1*H*-pyrazol-4-yl)methyl)acetamide (**10h**, 119 mg, 369 μmol, 88% yield).

**10h:** (*E*)-*N*-((5-(3,3-diisopropyltriaz-1-en-1-yl)-1-isobutyl-1*H*-pyrazol-4-yl)methyl)acetamide; Formula: C<sub>16</sub>H<sub>30</sub>N<sub>6</sub>O; Exact Mass: 322.2481; Smiles: CC(Cn1ccc(c1/N=N/N(C(C)C)C(C)C)CNC(=O)C)C  
InChIKey: NFQAOFXQAVIJOU-FMQUCBEESA-N

*R*<sub>f</sub> = 0.16 (cyclohexane/ethyl acetate 2:1). <sup>1</sup>H NMR (400 MHz, CDCl<sub>3</sub>, ppm) δ = 7.35 (s, 1H), 5.68 (br.s, 1H), 5.18–4.99 (m, 1H), 4.33 (d, *J* = 5.0 Hz, 2H), 4.07–4.03 (m, 1H), 4.01 (d, *J* = 7.3 Hz, 2H), 2.22 (sept, *J* = 6.9 Hz, 1H), 1.95 (s, 3H), 1.35 (br.d, *J* = 6.6 Hz, 6H), 1.27 (br.d, *J* = 6.8 Hz, 6H), 0.90 (d, *J* = 6.7 Hz, 6H); <sup>13</sup>C NMR (100 MHz, CDCl<sub>3</sub>, ppm) δ = 169.3, 147.8, 138.7 (+, CH), 103.3, 55.8 (–, CH<sub>2</sub>), 49.7 (+, CH), 46.9 (+, CH), 35.0 (–, CH<sub>2</sub>), 29.7 (+, CH), 23.6 (+, CH<sub>3</sub>), 23.5 (+, CH<sub>3</sub>, 2C), 20.3 (+, CH<sub>3</sub>, 2C), 19.2 (+, CH<sub>3</sub>, 2C); MS (FAB, Matrix: 3-NBA): *m/z* (%) = 324 (18) [M+2H]<sup>+</sup>, 323 (100) [M+H]<sup>+</sup>, 322 (12) [M]<sup>+</sup>, 265 (10), 264 (54), 222 (20), 209 (19), 167 (13), 100 (13), 97 (10), 96 (12), 95 (11), 91 (11); HRMS–FAB (*m/z*): [M+H]<sup>+</sup> Calcd for C<sub>16</sub>H<sub>31</sub>ON<sub>6</sub>, 323.2559; Found 323.2559; IR (ATR,  $\tilde{\nu}$ ) = 3272 (w), 3078 (vw), 2969 (m), 2931 (w), 2871 (w), 1649 (s), 1541 (s), 1466 (s), 1409 (vs), 1381 (s), 1363 (vs), 1313 (m), 1259 (s), 1239 (vs), 1222 (vs), 1159 (vs), 1119 (s), 1096 (s), 1021 (vs), 945 (m), 925 (m), 911 (m), 891 (m), 846 (m), 820 (w), 789 (m), 731 (m), 694 (m), 670 (m), 647 (m), 588 (m), 557 (s), 534 (m), 469 (m), 452 (w), 426 (m), 394 (w), 387 (w) cm<sup>–1</sup>.



Additional information on the chemical synthesis is available *via* Chemotion repository:  
<https://doi.org/10.14272/reaction/SA-FUHFF-UHFFFADPSC-NFQAOFXQAV-UHFFFADPSC-NUHFF-NGHTP-NUHFF-ZZZ>

Additional information on the analysis of the target compound is available *via* Chemotion repository:  
<https://doi.org/10.14272/NFQAOFXQAVIIOU-FMQUCBEESA-N.1>

**(*E*)-*N*-((5-(3,3-Diisopropyltriaz-1-en-1-yl)-1-isobutyl-1*H*-pyrazol-4-yl)methyl)benzamide (**10i**)**

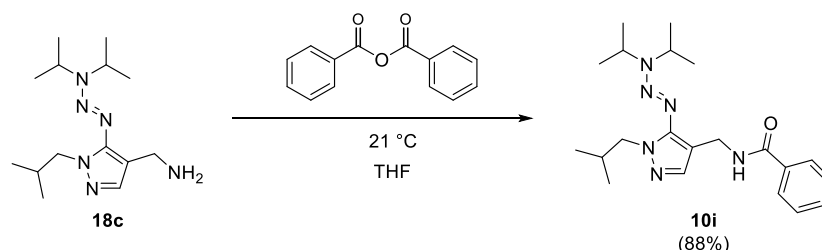

To a solution of (*E*)-5-(3,3-diisopropyltriaz-1-en-1-yl)-1-isobutyl-1*H*-pyrazol-4-yl)methanamine (**18c**, 106 mg, 377  $\mu\text{mol}$ , 1.00 equiv) in 5 mL of THF, benzoyl benzoate (170 mg, 142  $\mu\text{L}$ , 753  $\mu\text{mol}$ , 2.00 equiv) was added at 21  $^{\circ}\text{C}$ . The mixture was stirred at 21  $^{\circ}\text{C}$ . After 14 hours, 2 mL of a 2 M NaOH solution were added and the organic solvent was removed under reduced pressure. The remaining aqueous layer was extracted with methylene chloride ( $3 \times 10\text{ mL}$ ). The combined organic layers were washed with a saturated  $\text{NaHCO}_3$  solution and brine. It was then dried over  $\text{MgSO}_4$  and the solvent was removed under reduced pressure. The obtained crude product was purified *via* flash-chromatography on silica gel using cyclohexane/ethyl acetate 10:1 to 2:1, giving (*E*)-*N*-((5-(3,3-diisopropyltriaz-1-en-1-yl)-1-isobutyl-1*H*-pyrazol-4-yl)methyl)benzamide (**10i**, 128 mg, 332  $\mu\text{mol}$ , 88% yield) as pale-yellow fluffy crystals.

**10i:** (*E*)-*N*-((5-(3,3-diisopropyltriaz-1-en-1-yl)-1-isobutyl-1*H*-pyrazol-4-yl)methyl)benzamide; Formula:  $\text{C}_{21}\text{H}_{32}\text{N}_6\text{O}$ ; Exact Mass: 384.2638; Smiles: CC(Cn1ncc(c1/N=N/N(C(C)C)C(C)C)CNC(=O)c1ccccc1)C  
 InChIKey: MPFTVRYGHBGKIC-OCOZRVBESA-N

$R_f$  = 0.19 (cyclohexane/ethyl acetate 4:1).  $^1\text{H}$  NMR (400 MHz,  $\text{CDCl}_3$ , ppm)  $\delta$  = 7.76–7.68 (m, 2H), 7.51–7.33 (m, 4H), 6.28 (br.s, 1H), 5.15–4.96 (m, 1H), 4.54 (d,  $J$  = 4.8 Hz, 2H), 4.06–3.93 (m, 3H), 2.25 (sept,  $J$  = 13.8 Hz,  $J$  = 7.0 Hz, 1H), 1.28 (br.d,  $J$  = 6.7 Hz, 12H), 0.91 (d,  $J$  = 6.7 Hz, 6H);  $^{13}\text{C}$  NMR (100 MHz,  $\text{CDCl}_3$ , ppm)  $\delta$  = 167.1, 147.9, 138.9 (+, CH), 135.1, 131.3 (+, CH), 128.6 (+, CH, 2C), 127.0 (+, CH, 2C), 103.2, 55.8 (–,  $\text{CH}_2$ ), 50.0 (+, CH), 46.9 (+, CH), 35.5 (–,  $\text{CH}_2$ ), 29.7 (+, CH), 23.4 (+,  $\text{CH}_3$ , 2C), 20.3 (+,  $\text{CH}_3$ , 2C), 19.2 (+,  $\text{CH}_3$ , 2C); MS (FAB, Matrix: 3-NBA):  $m/z$  (%) = 386 (26)  $[\text{M}+2\text{H}]^+$ , 385 (100)  $[\text{M}+\text{H}]^+$ , 384 (12)  $[\text{M}]^+$ , 383 (11), 284 (26), 271 (29), 265 (12), 264 (65), 105 (51), 97 (10), 95 (11); HRMS–FAB ( $m/z$ ):  $[\text{M}+\text{H}]^+$  Calcd for  $\text{C}_{21}\text{H}_{33}\text{ON}_6$ , 385.2716; Found 385.2715; IR (ATR,  $\tilde{\nu}$ ) = 3315 (w), 3071 (vw), 3053 (vw), 2968 (w), 2928 (w), 2868 (w), 1635 (vs), 1601 (w), 1577 (w), 1543 (vs), 1492 (m), 1466 (m), 1446 (w), 1418 (vs), 1405 (vs), 1380 (s), 1363 (vs), 1324 (m), 1299 (vs), 1252 (vs), 1238 (vs), 1224 (vs), 1193 (w), 1153 (s), 1125 (s), 1109 (s), 1095 (m), 1081 (w), 1052 (w), 1017 (vs), 1001 (m), 980 (m), 945 (w), 928 (w), 912 (w), 892 (w), 882 (w), 853 (w), 822 (w), 809 (m), 781 (s), 739 (w), 715 (s), 697 (vs), 669 (m), 646 (s), 616 (m)  $\text{cm}^{-1}$ .

Additional information on the chemical synthesis is available *via* Chemotion repository:  
<https://doi.org/10.14272/reaction/SA-FUHFF-UHFFFADPSC-MPFTVRYGHB-UHFFFADPSC-NUHFF-NWMXW-NUHFF-ZZZ>

Additional information on the analysis of the target compound is available *via* Chemotion repository:  
<https://doi.org/10.14272/MPFTVRYGHBGKIC-OCOZRVBESA-N.1>

#### 4. Crystal structure determinations of compounds **12h** and **13c**

The single-crystal X-ray diffraction studies were carried out on a Bruker D8 Venture diffractometer with PhotonII detector at 123(2) K using CuK $\alpha$  radiation ( $\lambda = 1.54178$  Å). Dual space methods (SHELXT) [G. M. Sheldrick, *Acta Crystallogr.* 2015, **A71**, 3–8] were used for structure solution and refinement was carried out using SHELXL-2014 (full-matrix least-squares on  $F^2$ ) [G. M. Sheldrick, *Acta Crystallogr.* 2015, **C71**, 3–8]. Hydrogen atoms were localized by difference electron density determination and refined using a riding model. Semi-empirical absorption corrections were applied. For **12h** an extinction correction was applied.

**12h**: colourless crystals, C<sub>17</sub>H<sub>21</sub>BrN<sub>6</sub>,  $M_r = 389.31$ , crystal size  $0.18 \times 0.108 \times 0.04$  mm, monoclinic, space group  $P2_1/c$  (No. 14),  $a = 13.0525(10)$  Å,  $b = 14.3306(11)$  Å,  $c = 10.0264(8)$  Å,  $\beta = 97.128(2)^\circ$ ,  $V = 1860.9(3)$  Å<sup>3</sup>,  $Z = 4$ ,  $\rho = 1.390$  Mg/m<sup>3</sup>,  $\mu(\text{Cu-K}\alpha) = 3.09$  mm<sup>-1</sup>,  $F(000) = 800$ ,  $2\theta_{\text{max}} = 144.4^\circ$ , 33389 reflections, of which 3665 were independent ( $R_{\text{int}} = 0.024$ ), 218 parameters,  $R_1 = 0.022$  (for 3621  $I > 2\sigma(I)$ ),  $wR_2 = 0.056$  (all data),  $S = 1.03$ , largest diff. peak / hole =  $0.30 / -0.28$  e Å<sup>-3</sup>.

**13c**: colourless crystals, C<sub>17</sub>H<sub>20</sub>F<sub>2</sub>N<sub>6</sub>,  $M_r = 346.39$ , crystal size  $0.20 \times 0.16 \times 0.08$  mm, monoclinic, space group  $P2_1/c$  (No. 14),  $a = 9.7201(3)$  Å,  $b = 11.9699(4)$  Å,  $c = 15.3002(5)$  Å,  $\beta = 100.614(1)^\circ$ ,  $V = 1749.70(10)$  Å<sup>3</sup>,  $Z = 4$ ,  $\rho = 1.315$  Mg/m<sup>3</sup>,  $\mu(\text{Cu-K}\alpha) = 0.82$  mm<sup>-1</sup>,  $F(000) = 728$ ,  $2\theta_{\text{max}} = 144.6^\circ$ , 19144 reflections, of which 3428 were independent ( $R_{\text{int}} = 0.023$ ), 226 parameters,  $R_1 = 0.037$  (for 3330  $I > 2\sigma(I)$ ),  $wR_2 = 0.095$  (all data),  $S = 1.05$ , largest diff. peak / hole =  $0.53 / -0.24$  e Å<sup>-3</sup>.

CCDC 2054633 (**12h**), and 2054634 (**13c**) contain the supplementary crystallographic data for this paper. These data can be obtained free of charge from The Cambridge Crystallographic Data Centre via [www.ccdc.cam.ac.uk/data\\_request/cif](http://www.ccdc.cam.ac.uk/data_request/cif).

Table X-Ray-S1: Crystallographic and refinement data.

| Compound                              | <b>12h</b>                                       | <b>13c</b>                                                    |
|---------------------------------------|--------------------------------------------------|---------------------------------------------------------------|
| Emp. formula                          | C <sub>17</sub> H <sub>21</sub> BrN <sub>6</sub> | C <sub>17</sub> H <sub>20</sub> F <sub>2</sub> N <sub>6</sub> |
| Molar mass                            | 389.31                                           | 346.39                                                        |
| Temperature/K                         | 123                                              | 123                                                           |
| Crystal system                        | monoclinic                                       | monoclinic                                                    |
| Space group                           | $P2_1/c$                                         | $P2_1/c$                                                      |
| $a/\text{\AA}$                        | 13.0525(10)                                      | 9.7201(3)                                                     |
| $b/\text{\AA}$                        | 14.3306(11)                                      | 11.9699(4)                                                    |
| $c/\text{\AA}$                        | 10.0264(8)                                       | 15.3002(5)                                                    |
| $\alpha/^\circ$                       | 90                                               | 90                                                            |
| $\beta/^\circ$                        | 97.128(2)                                        | 100.614(1)                                                    |
| $\gamma/^\circ$                       | 90                                               | 90                                                            |
| Volume/Å <sup>3</sup>                 | 1860.9(3)                                        | 1749.70(10)                                                   |
| $Z$                                   | 4                                                | 4                                                             |
| $\rho_{\text{calc}}/\text{g cm}^{-3}$ | 1.390                                            | 1.3125                                                        |
| $\mu/\text{mm}^{-1}$                  | 3.09                                             | 0.82                                                          |
| $F(000)$                              | 800                                              | 2312                                                          |
| Radiation                             | CuK $\alpha$ ( $\lambda = 1.54178$ )             | CuK $\alpha$ ( $\lambda = 1.54178$ )                          |
| $2\theta$ range /°                    | 6.8–144.4                                        | 9.2–144.6                                                     |
| Refl. collected                       | 33389                                            | 19114                                                         |
| Independent refl.                     | 3665 [ $R_{\text{int}} = 0.024$ ]                | 3428 [ $R_{\text{int}} = 0.023$ ]                             |
| Ind. refl. $I \geq 2\sigma(I)$        | 3621                                             | 3330                                                          |
| Data/rest./param.                     | 3665/0/218                                       | 3428/0/226                                                    |
| Gof                                   | 1.03                                             | 1.05                                                          |
| R indexes<br>[ $I \geq 2\sigma(I)$ ]  | $R_1 = 0.022$ ,<br>$wR_2 = 0.056$                | $R_1 = 0.037$ ,<br>$wR_2 = 0.094$                             |
| R indexes<br>[all data]               | $R_1 = 0.022$ ,<br>$wR_2 = 0.056$                | $R_1 = 0.038$ ,<br>$wR_2 = 0.095$                             |
| Diff. peak/hole /eÅ <sup>-3</sup>     | 0.30/−0.28                                       | 0.53/−0.24                                                    |
| CCDC no.                              | 2054633                                          | 2054634                                                       |

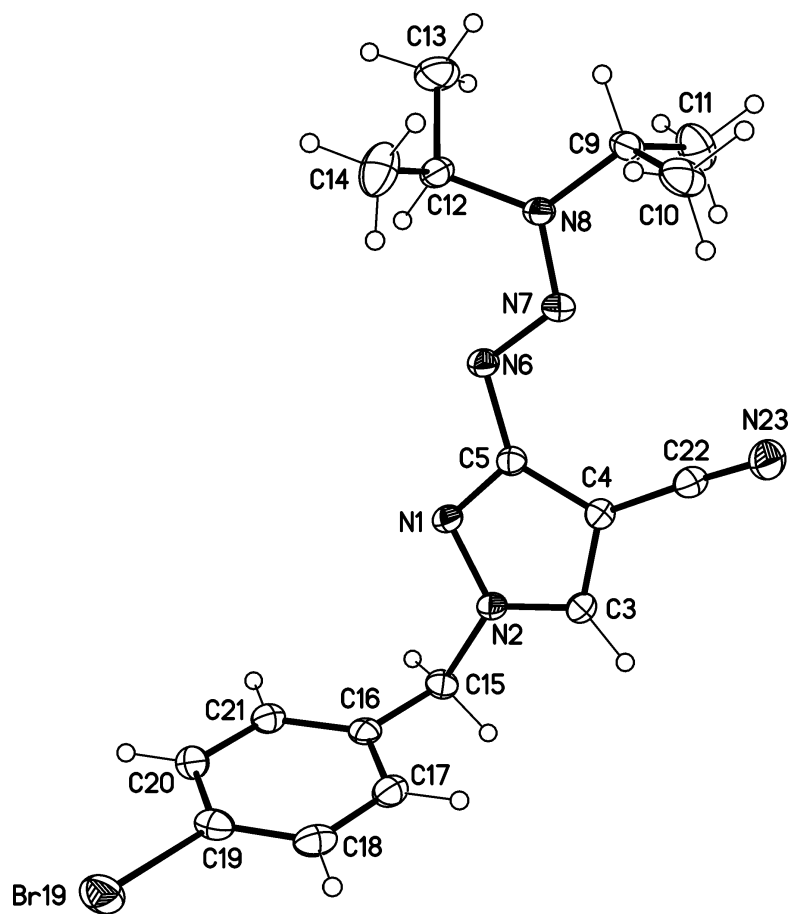

**Figure S1.** Molecular structure of **12h** (displacement parameters are drawn at 50 % probability level).

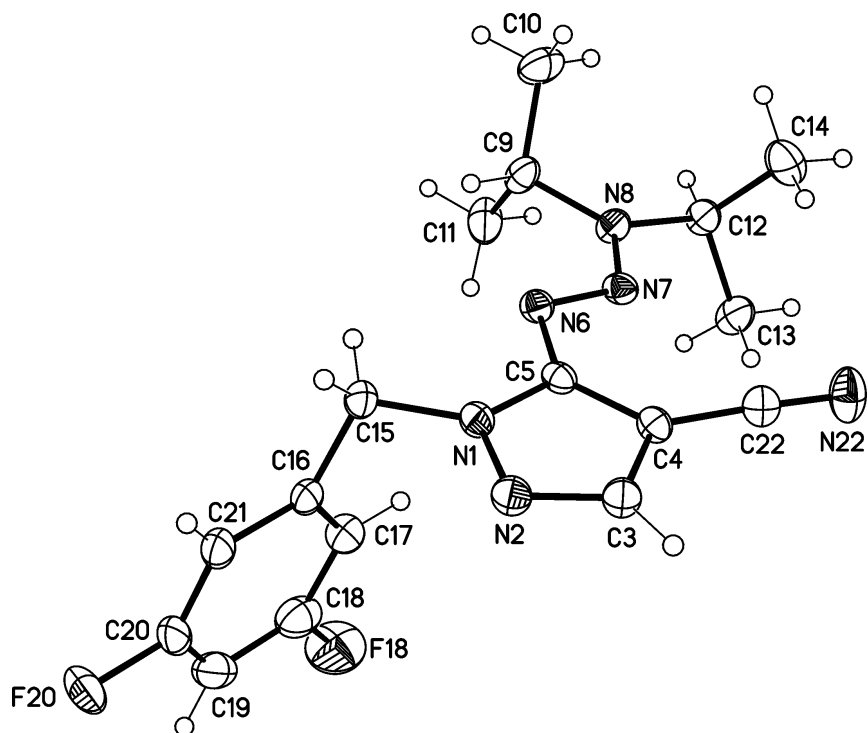

**Figure S2.** Molecular structure of **13c** (displacement parameters are drawn at 50 % probability level).

## 5. Biological assays

Biological assays were carried out under sterile conditions using the sterile benches LaminAir® HB2448 (HERAEUS GmbH), Laminar-Flow Werkbank (BDK LUFT- UND REINRAUMTECHNIK GmbH) or Clean Air Technik (CLEAN AIR). Cells were incubated at 37 °C, 5% CO<sub>2</sub>, and 85% humidity using a BINDER Ex-Demo Units Incubator.

### Cell culture

Human epithelial cervix carcinoma (HeLa) cells were cultivated in *Dulbecco's Modified Eagle Medium-high glucose* (DMEM, GIBCO™) supplemented with 10% fetal calf serum (FCS) and 1% penicillin/streptomycin (P/S). At 80% confluency, the medium was removed, the cells were washed with *Dulbecco's Phosphate Buffered Saline* (DPBS, GIBCO™) and treated with trypsin/EDTA (GIBCO™) to passage the cells. The detachment process was stopped with culture medium (DMEM + 10% FBS + 1% P/S) and the cells were seeded according to the desired cell number/area.

### MTT assay<sup>[1]</sup>

In a 96-well plate (CORNING® Costar® 3596 96-Well Cell Culture Cluster),  $1.0 \times 10^4$  HeLa cells per well of a 96-well plate were cultivated for 16 h. Stock solutions of the single compounds in dimethylsulfoxide were diluted to 0.50  $\mu$ M, 1.00  $\mu$ M, 5.00  $\mu$ M, 10.0  $\mu$ M, 25.0  $\mu$ M, and 50.0  $\mu$ M with cell culture medium (DMEM + 10% FBS + 1% P/S) to ensure a final concentration of DMSO below 0.5%. Then, 100  $\mu$ L of the prepared DMEM-diluted compounds were added to each well and the cells were incubated for 72 h. All experiments were performed in triplicates. Cells that were solely treated with the culture medium containing 0.5% of DMSO served as a negative control. After incubation, the positive control (cells in DMEM plus 0.5% DMSO) was treated with 1% Triton-X. To determine the viability of the cells 20  $\mu$ L of a freshly prepared solution of 3-(4,5-dimethylthiazol-2-yl)-2,5-diphenyltetrazolium bromide (MTT, 2.73 mg/mL, SIGMA-ALDRICH®) in culture medium were added to each well and incubated at 37 °C for 4 h. The reaction was stopped using 100  $\mu$ L of *Solubilization Solution / Stop Mix* (CellTiter 96® Non-Radioactive Cell Proliferation Assay, PROMEGA). After 72 h, the absorption (A) of every well at 595 nm was monitored using a 96-well plate reader (Ultra Microplate Reader ELx808, BIOTECH INSTRUMENTS INC.). Graphic evaluation using a dose response fitting was carried out with the help of the software OriginPro® 2021. IC<sub>50</sub> values were calculated with Excel.

**Table S1.** Selected pyrazolo[1,2,3]triazines **5** and intermediates **9**, **12**, **13** and **16** and their calculated IC<sub>50</sub> values after treatment of HeLa cells with different concentrations of the respective compounds.

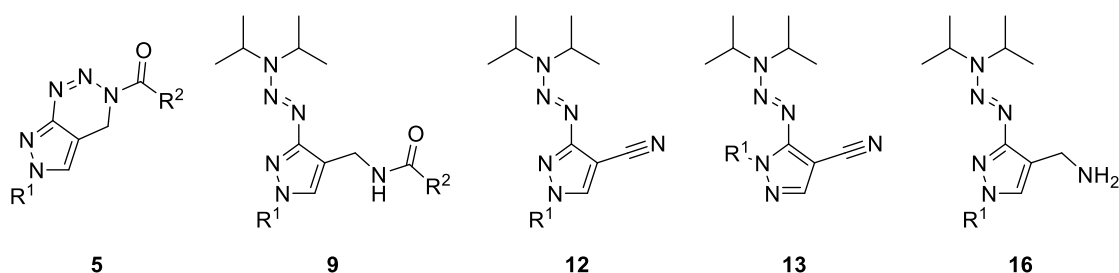

| Entry | Compound  | R <sup>1</sup>     | R <sup>2</sup> | IC <sub>50</sub> [ $\mu$ M] |
|-------|-----------|--------------------|----------------|-----------------------------|
| 1     | <b>5a</b> | Bn                 | Me             | >50                         |
| 2     | <b>5d</b> | 3,5-Difluorobenzyl | Me             | >50                         |
| 3     | <b>5e</b> | Ethyl              | Me             | >50                         |
| 4     | <b>5f</b> | Cyclopentyl        | Me             | >50                         |
| 5     | <b>5h</b> | <i>t</i> Butyl     | Me             | >50                         |
| 6     | <b>9a</b> | Bn                 | Me             | >50                         |
| 7     | <b>9b</b> | Bn                 | Ph             | 17                          |

|    |            |                                                   |                |     |
|----|------------|---------------------------------------------------|----------------|-----|
| 8  | <b>9c</b>  | Tolyl-CH <sub>2</sub>                             | <i>i</i> Butyl | >50 |
| 9  | <b>9d</b>  | 3,5-Difluorobenzyl                                | Me             | >50 |
| 10 | <b>9e</b>  | Ethyl                                             | Me             | >50 |
| 11 | <b>9f</b>  | Cyclopentyl                                       | Me             | >50 |
| 12 | <b>9g</b>  | Cyclopentyl                                       | Me             | >50 |
| 13 | <b>9h</b>  | <i>i</i> Butyl                                    | Ph             | >50 |
| 14 | <b>9i</b>  | MeCO <sub>2</sub> (CH <sub>2</sub> ) <sub>2</sub> | Me             | >50 |
| 15 | <b>12a</b> | Bn                                                | —              | >50 |
| 16 | <b>12b</b> | Tolyl-CH <sub>2</sub>                             | —              | 41  |
| 17 | <b>12c</b> | 3,5-Difluorobenzyl                                | —              | 49  |
| 18 | <b>12d</b> | Ethyl                                             | —              | >50 |
| 19 | <b>12e</b> | Cyclopentyl                                       | —              | >50 |
| 20 | <b>12f</b> | <i>i</i> Butyl                                    | —              | >50 |
| 21 | <b>12g</b> | EtCO <sub>2</sub> CH <sub>2</sub>                 | —              | >50 |
| 22 | <b>12h</b> | 4-Bromobenzyl                                     | —              | >50 |
| 23 | <b>13a</b> | Bn                                                | —              | 47  |
| 24 | <b>13b</b> | Tolyl-CH <sub>2</sub>                             | —              | 45  |
| 25 | <b>13c</b> | 3,5-Difluorobenzyl                                | —              | >50 |
| 26 | <b>13d</b> | Ethyl                                             | —              | 20  |
| 27 | <b>13e</b> | Cyclopentyl                                       | —              | >50 |
| 28 | <b>13f</b> | <i>i</i> Butyl                                    | —              | 46  |
| 29 | <b>13g</b> | EtCO <sub>2</sub> CH <sub>2</sub>                 | —              | 21  |
| 30 | <b>13h</b> | 4-Bromobenzyl                                     | —              | 29  |
| 31 | <b>16f</b> | <i>i</i> Butyl                                    | —              | >50 |

**Table S2:** Graphical representation of the MTT assays conducted for selected compounds and their respective calculated IC<sub>50</sub> values.

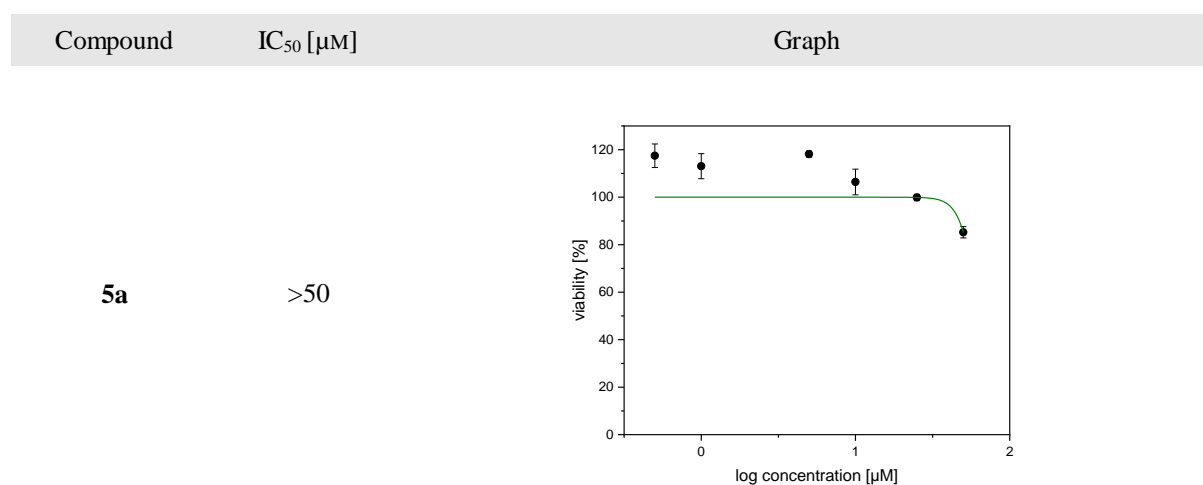

**5d** >50

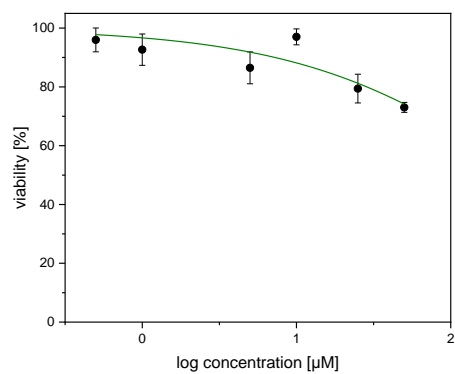

**5e** >50

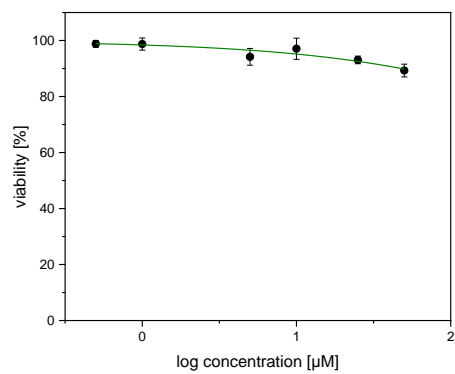

**5f** >50

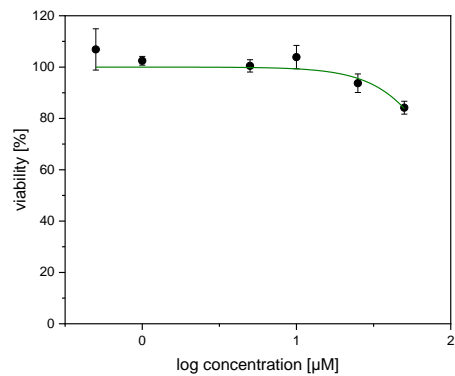

**5h** >50

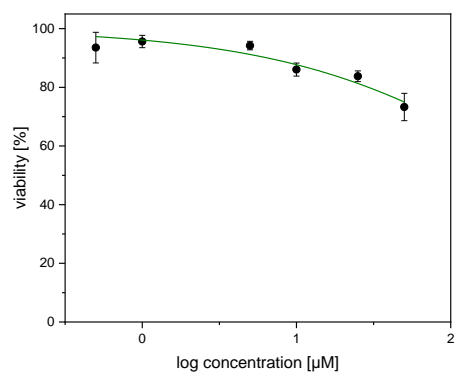

**9a** >50

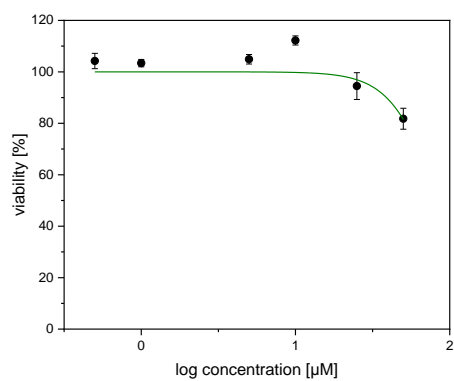

**9b** 17

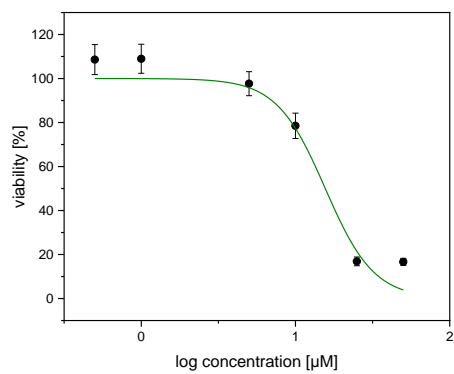

**9c** >50

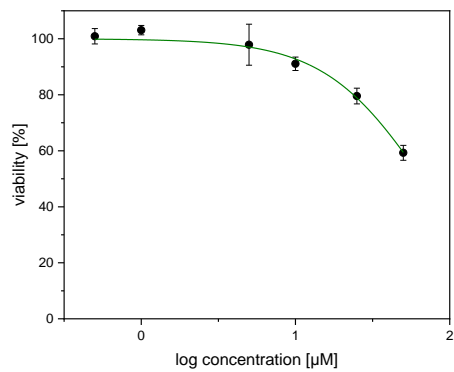

**9d** >50

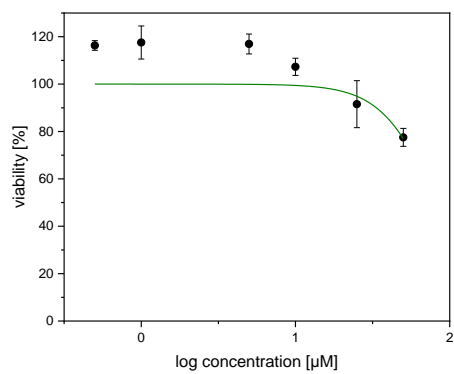

**9e** >50

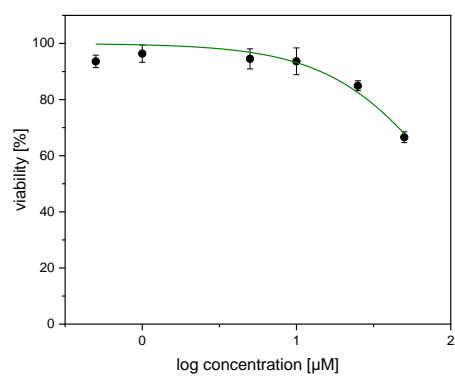

**9f** >50

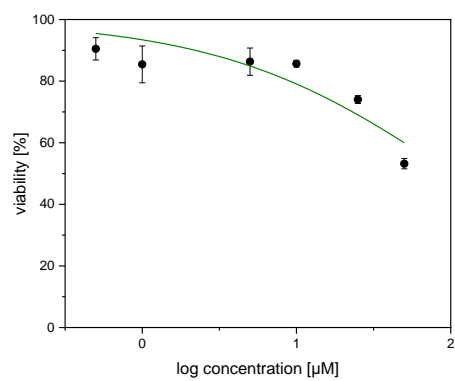

**9g** >50

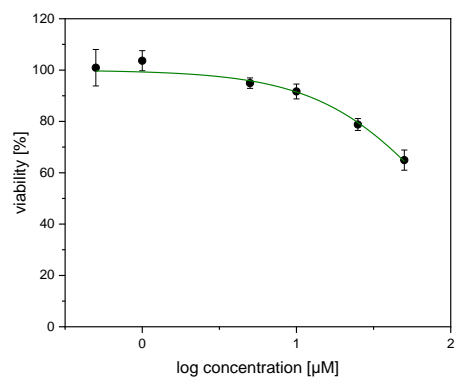

**9h** >50

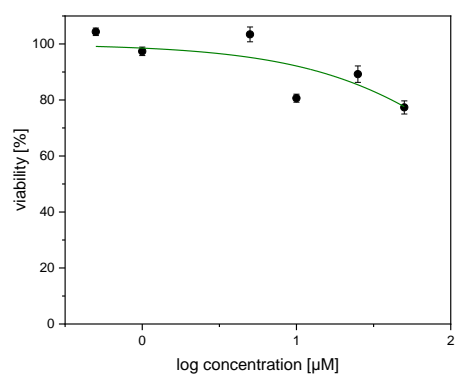



**9i** >50

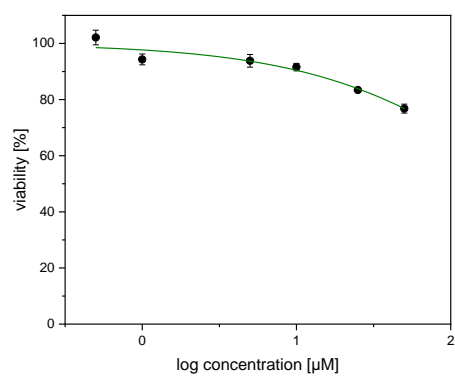

**10h** >50

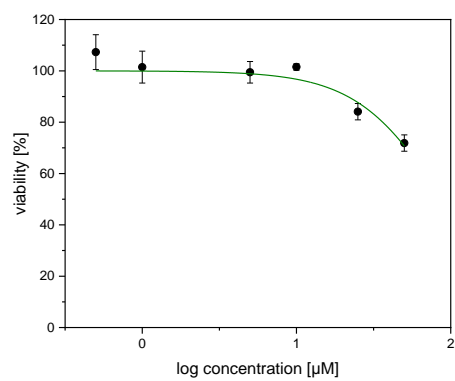

**12a** >50

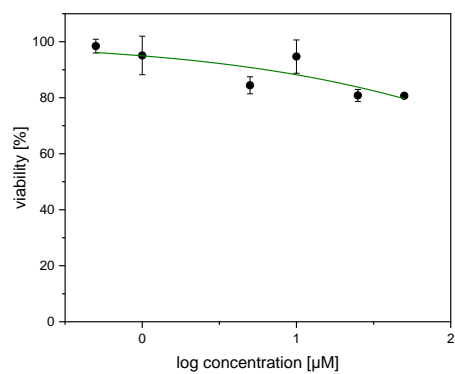

**12b** 41

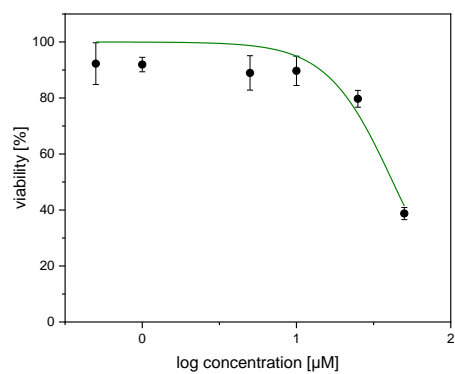

**12c**

49

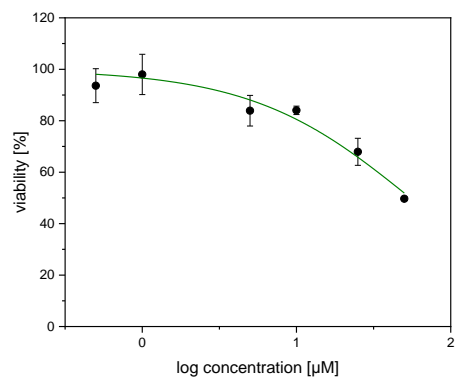

**12d**

>50

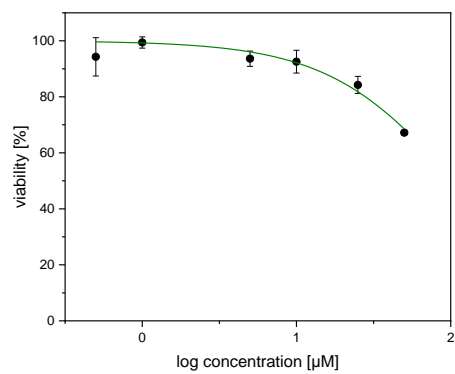

**12e**

>50

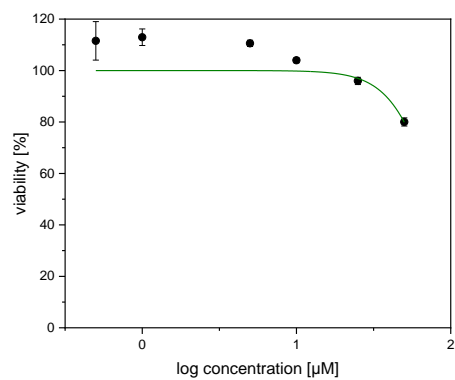

**12f**

>50

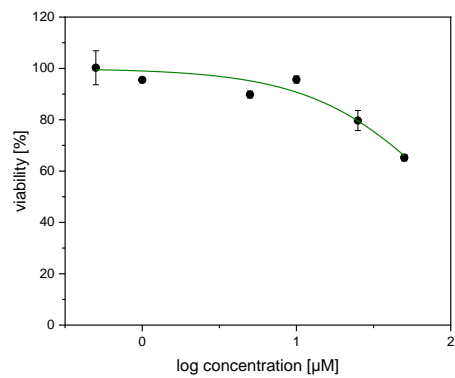

**12g**

>50

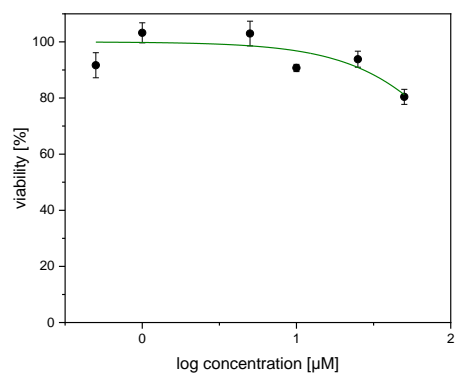

**12h**

>50

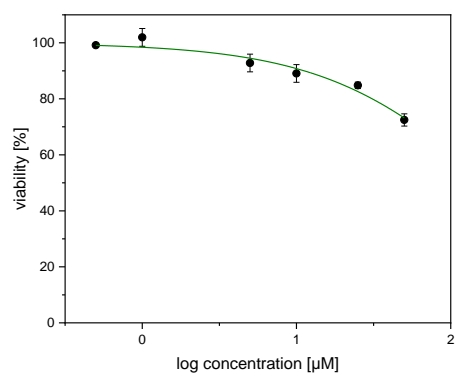

**13a**

47

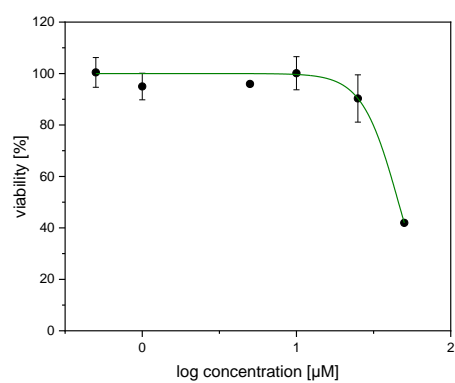

**13b**

45

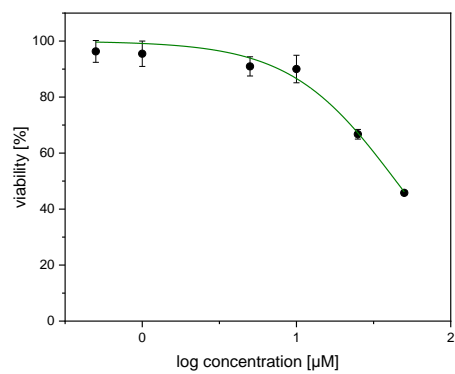

**13c** >50

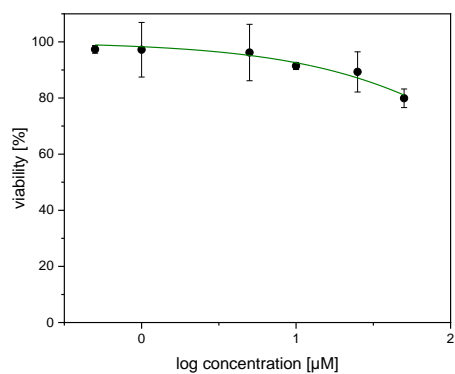

**13d** 20

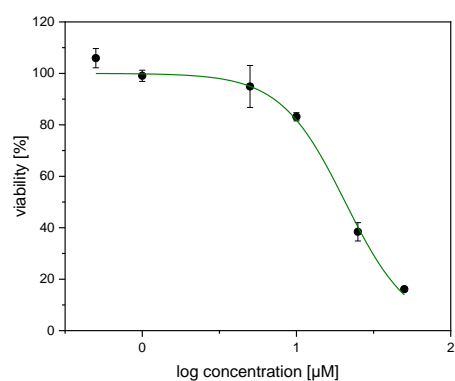

**13e** >50

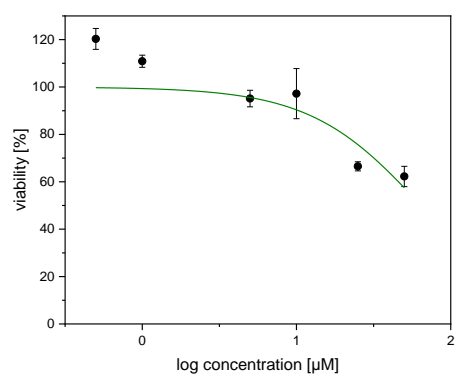

**13f** 46

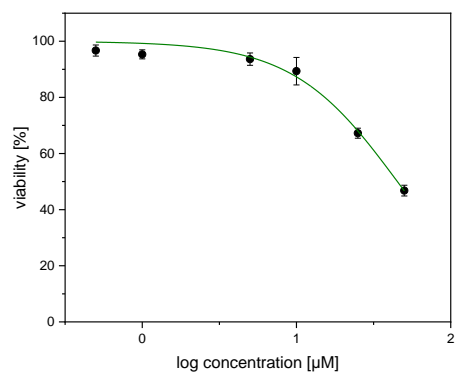

13g

21

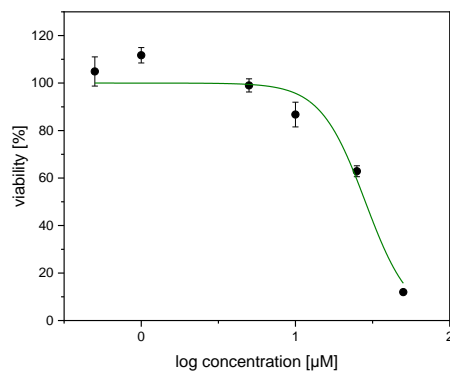

13h

29

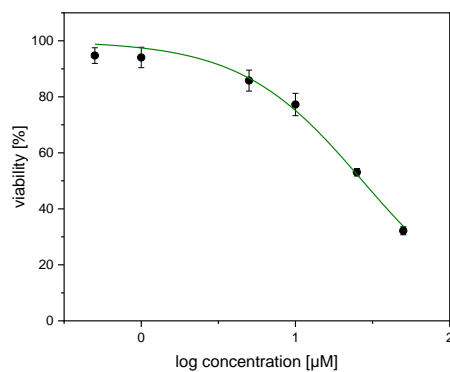

16f

&gt;50

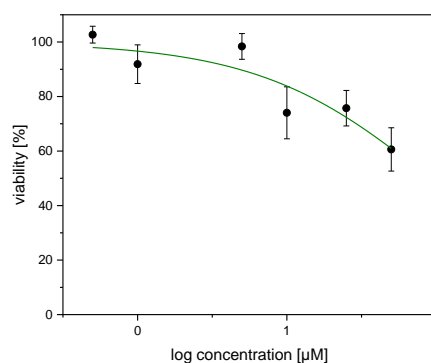

**Table S3.** Graphical overview about selected pyrazolo[1,2,3]triazines **5** and intermediates **9**, **12** and **13** and their calculated IC<sub>50</sub> values after treatment of HeLa cells with different concentrations of the respective compounds.

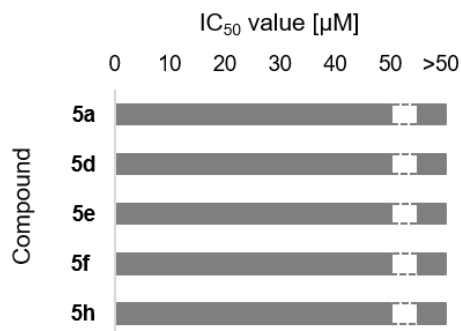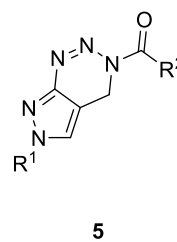

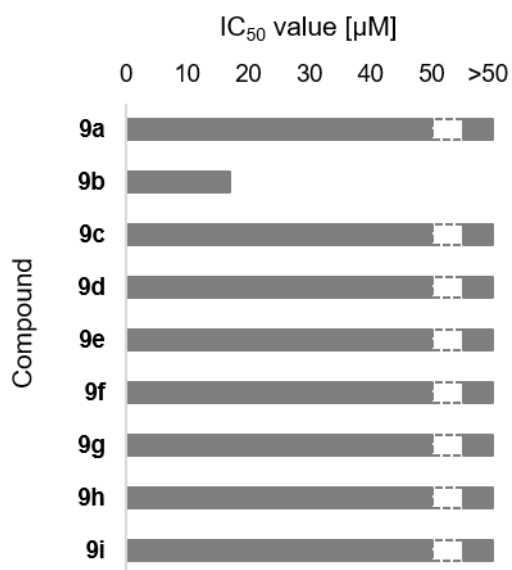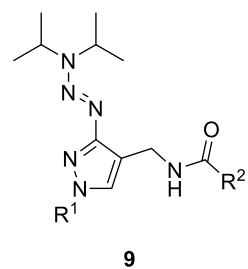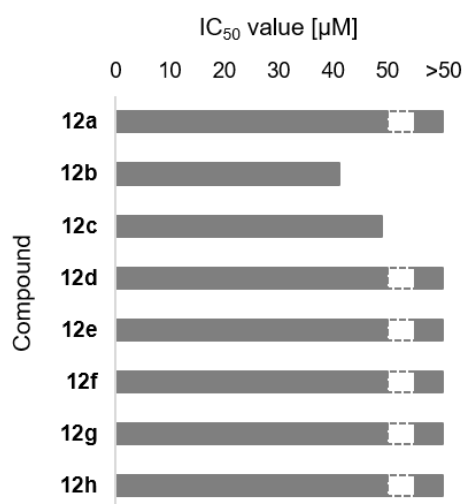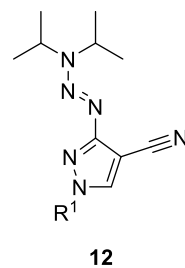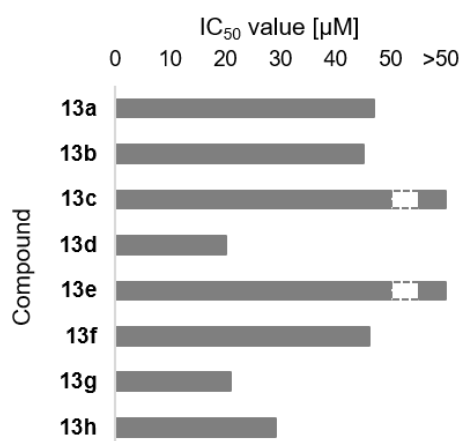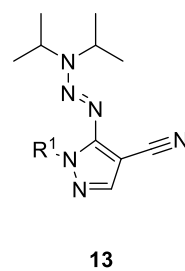

## 6. References

1. Mosmann, T. J. *Immunol. Methods* **1983**, 65, 55-63.
