# Supplementary material for: Synthesis of new pyrazolo[1,2,3]triazines by cyclative cleavage of pyrazolyltriazenes
Source: Beilstein J Org Chem. 2021 Nov 22;17:2773–80. doi: 10.3762/bjoc.17.187 (PMC8630434; doi:10.3762/bjoc.17.187)
Supplement: File 3 — Direkt links to datasets and reference numbers of target compounds in Molecule Archive. [file Beilstein_J_Org_Chem-17-2773-s003.xlsx]

## Sheet: reaction
Compound	Material availability			Data availability
canonical smiles	Deposit number	corresponds to	Decomposition during storage	doi	url	r doi	r url
CC(=O)N1N=Nc2c(C1)cn(n2)Cc1ccccc1	X13194	X12601	x	10.14272/PGERMRZARQFUFX-UHFFFAOYSA-N.1	https://dx.doi.org/10.14272/PGERMRZARQFUFX-UHFFFAOYSA-N.1	10.14272/reaction/SA-FUHFF-UHFFFADPSC-PGERMRZARQ-UHFFFADPSC-NUHFF-NUHFF-NUHFF-ZZZ	https://dx.doi.org/10.14272/reaction/SA-FUHFF-UHFFFADPSC-PGERMRZARQ-UHFFFADPSC-NUHFF-NUHFF-NUHFF-ZZZ
CC(=O)N1N=Nc2c(C1)cn(n2)Cc1ccccc1	X12601	X13194		10.14272/PGERMRZARQFUFX-UHFFFAOYSA-N.2	https://dx.doi.org/10.14272/PGERMRZARQFUFX-UHFFFAOYSA-N.2	10.14272/reaction/SA-FUHFF-UHFFFADPSC-PGERMRZARQ-UHFFFADPSC-NUHFF-NUHFF-NUHFF-ZZZ.1	https://dx.doi.org/10.14272/reaction/SA-FUHFF-UHFFFADPSC-PGERMRZARQ-UHFFFADPSC-NUHFF-NUHFF-NUHFF-ZZZ.1
N#Cc1cn(nc1/N=N/N(C(C)C)C(C)C)C	X13187			10.14272/ZRCLCIFZBTWNCX-FYWRMAATSA-N.1	https://dx.doi.org/10.14272/ZRCLCIFZBTWNCX-FYWRMAATSA-N.1	10.14272/reaction/SA-FUHFF-UHFFFADPSC-BNVJXIJQBS-UHFFFADPSC-NUHFF-NCKVK-NUHFF-ZZZ	https://dx.doi.org/10.14272/reaction/SA-FUHFF-UHFFFADPSC-BNVJXIJQBS-UHFFFADPSC-NUHFF-NCKVK-NUHFF-ZZZ
CC(N(C(C)C)/N=N/c1n(C)ncc1C#N)C	X13186			10.14272/IEAGUOOJWBIVEW-CCEZHUSRSA-N.1	https://dx.doi.org/10.14272/IEAGUOOJWBIVEW-CCEZHUSRSA-N.1	10.14272/reaction/SA-FUHFF-UHFFFADPSC-BNVJXIJQBS-UHFFFADPSC-NUHFF-NCKVK-NUHFF-ZZZ	https://dx.doi.org/10.14272/reaction/SA-FUHFF-UHFFFADPSC-BNVJXIJQBS-UHFFFADPSC-NUHFF-NCKVK-NUHFF-ZZZ
N#Cc1cn(nc1/N=N/N(C(C)C)C(C)C)c1ccc(cc1)[N+](=O)[O-]	X13176			10.14272/OWJGFCXTEBEUEN-CZIZESTLSA-N.1	https://dx.doi.org/10.14272/OWJGFCXTEBEUEN-CZIZESTLSA-N.1	10.14272/reaction/SA-FUHFF-UHFFFADPSC-AGNSEZRSQO-UHFFFADPSC-NUHFF-NATJS-NUHFF-ZZZ	https://dx.doi.org/10.14272/reaction/SA-FUHFF-UHFFFADPSC-AGNSEZRSQO-UHFFFADPSC-NUHFF-NATJS-NUHFF-ZZZ
N#Cc1cnn(c1/N=N/N(C(C)C)C(C)C)c1ccc(cc1)[N+](=O)[O-]	X13178			10.14272/ZRSIZLVHDLEVQU-FMQUCBEESA-N.1	https://dx.doi.org/10.14272/ZRSIZLVHDLEVQU-FMQUCBEESA-N.1	10.14272/reaction/SA-FUHFF-UHFFFADPSC-AGNSEZRSQO-UHFFFADPSC-NUHFF-NATJS-NUHFF-ZZZ	https://dx.doi.org/10.14272/reaction/SA-FUHFF-UHFFFADPSC-AGNSEZRSQO-UHFFFADPSC-NUHFF-NATJS-NUHFF-ZZZ
N#Cc1cn(nc1/N=N/N(C(C)C)C(C)C)Cc1cc(F)cc(c1)F	X11633			10.14272/WSQPCVJPBSUDNZ-XTQSDGFTSA-N.1	https://dx.doi.org/10.14272/WSQPCVJPBSUDNZ-XTQSDGFTSA-N.1	10.14272/reaction/SA-FUHFF-UHFFFADPSC-RPEOLKMCSJ-UHFFFADPSC-NUHFF-NJTWA-NUHFF-ZZZ	https://dx.doi.org/10.14272/reaction/SA-FUHFF-UHFFFADPSC-RPEOLKMCSJ-UHFFFADPSC-NUHFF-NJTWA-NUHFF-ZZZ
CC(N(C(C)C)/N=N/c1n(ncc1C#N)Cc1cc(F)cc(c1)F)C	X11632			10.14272/ZFEWCQZPKGQXCJ-GHVJWSGMSA-N.1	https://dx.doi.org/10.14272/ZFEWCQZPKGQXCJ-GHVJWSGMSA-N.1	10.14272/reaction/SA-FUHFF-UHFFFADPSC-RPEOLKMCSJ-UHFFFADPSC-NUHFF-NJTWA-NUHFF-ZZZ	https://dx.doi.org/10.14272/reaction/SA-FUHFF-UHFFFADPSC-RPEOLKMCSJ-UHFFFADPSC-NUHFF-NJTWA-NUHFF-ZZZ
N#Cc1cn(nc1/N=N/N(C(C)C)C(C)C)Cc1ccccc1	X11703			10.14272/AONLLYWWGOIMLR-XUTLUUPISA-N.1	https://dx.doi.org/10.14272/AONLLYWWGOIMLR-XUTLUUPISA-N.1	10.14272/reaction/SA-FUHFF-UHFFFADPSC-KRKANRSFKB-UHFFFADPSC-NUHFF-NVGOA-NUHFF-ZZZ	https://dx.doi.org/10.14272/reaction/SA-FUHFF-UHFFFADPSC-KRKANRSFKB-UHFFFADPSC-NUHFF-NVGOA-NUHFF-ZZZ
CC(N(C(C)C)/N=N/c1n(ncc1C#N)Cc1ccccc1)C	X11702			10.14272/AQYSAXXLCHFEGV-QZQOTICOSA-N.1	https://dx.doi.org/10.14272/AQYSAXXLCHFEGV-QZQOTICOSA-N.1	10.14272/reaction/SA-FUHFF-UHFFFADPSC-KRKANRSFKB-UHFFFADPSC-NUHFF-NVGOA-NUHFF-ZZZ	https://dx.doi.org/10.14272/reaction/SA-FUHFF-UHFFFADPSC-KRKANRSFKB-UHFFFADPSC-NUHFF-NVGOA-NUHFF-ZZZ
N#Cc1cn(nc1/N=N/N(C(C)C)C(C)C)Cc1ccc(cc1)C	X13506			10.14272/GJXVYPGROXVEAZ-LSDHQDQOSA-N.1	https://dx.doi.org/10.14272/GJXVYPGROXVEAZ-LSDHQDQOSA-N.1	10.14272/reaction/SA-FUHFF-UHFFFADPSC-UZTCZZRTCD-UHFFFADPSC-NUHFF-NPQQK-NUHFF-ZZZ	https://dx.doi.org/10.14272/reaction/SA-FUHFF-UHFFFADPSC-UZTCZZRTCD-UHFFFADPSC-NUHFF-NPQQK-NUHFF-ZZZ
N#Cc1cnn(c1/N=N/N(C(C)C)C(C)C)Cc1ccc(cc1)C	X13505			10.14272/RAZAPXAZBSDVNH-QURGRASLSA-N.1	https://dx.doi.org/10.14272/RAZAPXAZBSDVNH-QURGRASLSA-N.1	10.14272/reaction/SA-FUHFF-UHFFFADPSC-UZTCZZRTCD-UHFFFADPSC-NUHFF-NPQQK-NUHFF-ZZZ	https://dx.doi.org/10.14272/reaction/SA-FUHFF-UHFFFADPSC-UZTCZZRTCD-UHFFFADPSC-NUHFF-NPQQK-NUHFF-ZZZ
N#Cc1cn(nc1/N=N/N(C(C)C)C(C)C)CC(C)C	X13785			10.14272/GSWCLGSPFBAJHR-FBMGVBCBSA-N.1	https://dx.doi.org/10.14272/GSWCLGSPFBAJHR-FBMGVBCBSA-N.1	10.14272/reaction/SA-FUHFF-UHFFFADPSC-NZDLOEMQHU-UHFFFADPSC-NUHFF-NXEFH-NUHFF-ZZZ	https://dx.doi.org/10.14272/reaction/SA-FUHFF-UHFFFADPSC-NZDLOEMQHU-UHFFFADPSC-NUHFF-NXEFH-NUHFF-ZZZ
N#Cc1cnn(c1/N=N/N(C(C)C)C(C)C)CC(C)C	X13784			10.14272/MWOHIDYQOPZPNH-ISLYRVAYSA-N.1	https://dx.doi.org/10.14272/MWOHIDYQOPZPNH-ISLYRVAYSA-N.1	10.14272/reaction/SA-FUHFF-UHFFFADPSC-NZDLOEMQHU-UHFFFADPSC-NUHFF-NXEFH-NUHFF-ZZZ	https://dx.doi.org/10.14272/reaction/SA-FUHFF-UHFFFADPSC-NZDLOEMQHU-UHFFFADPSC-NUHFF-NXEFH-NUHFF-ZZZ
CCOC(=O)Cn1nc(c(c1)C#N)/N=N/N(C(C)C)C(C)C	X13893			10.14272/GMSYXQOQYOUAHU-FBMGVBCBSA-N.1	https://dx.doi.org/10.14272/GMSYXQOQYOUAHU-FBMGVBCBSA-N.1	10.14272/reaction/SA-FUHFF-UHFFFADPSC-HLSFJQKZZG-UHFFFADPSC-NUHFF-NQFOL-NUHFF-ZZZ	https://dx.doi.org/10.14272/reaction/SA-FUHFF-UHFFFADPSC-HLSFJQKZZG-UHFFFADPSC-NUHFF-NQFOL-NUHFF-ZZZ
CCOC(=O)Cn1ncc(c1/N=N/N(C(C)C)C(C)C)C#N	X13892			10.14272/UVXRQPKXJULFTR-ISLYRVAYSA-N.1	https://dx.doi.org/10.14272/UVXRQPKXJULFTR-ISLYRVAYSA-N.1	10.14272/reaction/SA-FUHFF-UHFFFADPSC-HLSFJQKZZG-UHFFFADPSC-NUHFF-NQFOL-NUHFF-ZZZ	https://dx.doi.org/10.14272/reaction/SA-FUHFF-UHFFFADPSC-HLSFJQKZZG-UHFFFADPSC-NUHFF-NQFOL-NUHFF-ZZZ
CC(N(C(C)C)/N=N/c1nn(cc1C#N)C1CCCC1)C	X15672			10.14272/VHDGMVPZVVGIBB-HTXNQAPBSA-N.1	https://dx.doi.org/10.14272/VHDGMVPZVVGIBB-HTXNQAPBSA-N.1	10.14272/reaction/SA-FUHFF-UHFFFADPSC-CCXXYIBWZN-UHFFFADPSC-NUHFF-NCWUQ-NUHFF-ZZZ	https://dx.doi.org/10.14272/reaction/SA-FUHFF-UHFFFADPSC-CCXXYIBWZN-UHFFFADPSC-NUHFF-NCWUQ-NUHFF-ZZZ
CC(N(C(C)C)/N=N/c1n(ncc1C#N)C1CCCC1)C	X15671			10.14272/OPJIUORDWAXUPI-VHEBQXMUSA-N.1	https://dx.doi.org/10.14272/OPJIUORDWAXUPI-VHEBQXMUSA-N.1	10.14272/reaction/SA-FUHFF-UHFFFADPSC-CCXXYIBWZN-UHFFFADPSC-NUHFF-NCWUQ-NUHFF-ZZZ	https://dx.doi.org/10.14272/reaction/SA-FUHFF-UHFFFADPSC-CCXXYIBWZN-UHFFFADPSC-NUHFF-NCWUQ-NUHFF-ZZZ
CC(N(C(C)C)/N=N/c1nn(cc1CNC(=O)c1ccccc1)Cc1ccccc1)C	X13288			10.14272/CYCAXLGFKDSWNS-BYCLXTJYSA-N.1	https://dx.doi.org/10.14272/CYCAXLGFKDSWNS-BYCLXTJYSA-N.1	10.14272/reaction/SA-FUHFF-UHFFFADPSC-CYCAXLGFKD-UHFFFADPSC-NUHFF-NULGB-NUHFF-ZZZ	https://dx.doi.org/10.14272/reaction/SA-FUHFF-UHFFFADPSC-CYCAXLGFKD-UHFFFADPSC-NUHFF-NULGB-NUHFF-ZZZ
CC(N(C(C)C)/N=N/c1nn(cc1CNC(=O)c1ccccc1)Cc1ccccc1)C	X13288			10.14272/CYCAXLGFKDSWNS-BYCLXTJYSA-N.2	https://dx.doi.org/10.14272/CYCAXLGFKDSWNS-BYCLXTJYSA-N.2	10.14272/reaction/SA-FUHFF-UHFFFADPSC-CYCAXLGFKD-UHFFFADPSC-NUHFF-NULGB-NUHFF-ZZZ.1	https://dx.doi.org/10.14272/reaction/SA-FUHFF-UHFFFADPSC-CYCAXLGFKD-UHFFFADPSC-NUHFF-NULGB-NUHFF-ZZZ.1
CC(=O)NCc1cn(nc1/N=N/N(C(C)C)C(C)C)Cc1cc(F)cc(c1)F	X13544			10.14272/NQVQLXTURKHERM-WJTDDFOZSA-N.1	https://dx.doi.org/10.14272/NQVQLXTURKHERM-WJTDDFOZSA-N.1	10.14272/reaction/SA-FUHFF-UHFFFADPSC-NQVQLXTURK-UHFFFADPSC-NUHFF-NCVEK-NUHFF-ZZZ	https://dx.doi.org/10.14272/reaction/SA-FUHFF-UHFFFADPSC-NQVQLXTURK-UHFFFADPSC-NUHFF-NCVEK-NUHFF-ZZZ
CC(Cn1cc2c(n1)N=NN(C2)C(=O)C)C	X12603			10.14272/WDXQCIDOHPSJHM-UHFFFAOYSA-N.1	https://dx.doi.org/10.14272/WDXQCIDOHPSJHM-UHFFFAOYSA-N.1	10.14272/reaction/SA-FUHFF-UHFFFADPSC-WDXQCIDOHP-UHFFFADPSC-NUHFF-NUHFF-NUHFF-ZZZ	https://dx.doi.org/10.14272/reaction/SA-FUHFF-UHFFFADPSC-WDXQCIDOHP-UHFFFADPSC-NUHFF-NUHFF-NUHFF-ZZZ
CCn1nc2c(c1)CN(N=N2)C(=O)C	X12604			10.14272/AHUQBMJJIBAFGD-UHFFFAOYSA-N.1	https://dx.doi.org/10.14272/AHUQBMJJIBAFGD-UHFFFAOYSA-N.1	10.14272/reaction/SA-FUHFF-UHFFFADPSC-AHUQBMJJIB-UHFFFADPSC-NUHFF-NUHFF-NUHFF-ZZZ	https://dx.doi.org/10.14272/reaction/SA-FUHFF-UHFFFADPSC-AHUQBMJJIB-UHFFFADPSC-NUHFF-NUHFF-NUHFF-ZZZ
CC(=O)N1N=Nc2c(C1)cn(n2)C1CCCC1	X12605			10.14272/QFPQAGCPTOKOBM-UHFFFAOYSA-N.1	https://dx.doi.org/10.14272/QFPQAGCPTOKOBM-UHFFFAOYSA-N.1	10.14272/reaction/SA-FUHFF-UHFFFADPSC-QFPQAGCPTO-UHFFFADPSC-NUHFF-NUHFF-NUHFF-ZZZ	https://dx.doi.org/10.14272/reaction/SA-FUHFF-UHFFFADPSC-QFPQAGCPTO-UHFFFADPSC-NUHFF-NUHFF-NUHFF-ZZZ
Fc1cc(cc(c1)F)Cn1cc2c(n1)N=NN(C2)C(=O)C	X13557			10.14272/CEFFSZUXPZAWPN-UHFFFAOYSA-N.1	https://dx.doi.org/10.14272/CEFFSZUXPZAWPN-UHFFFAOYSA-N.1	10.14272/reaction/SA-FUHFF-UHFFFADPSC-CEFFSZUXPZ-UHFFFADPSC-NUHFF-NUHFF-NUHFF-ZZZ	https://dx.doi.org/10.14272/reaction/SA-FUHFF-UHFFFADPSC-CEFFSZUXPZ-UHFFFADPSC-NUHFF-NUHFF-NUHFF-ZZZ
CC(=O)NCc1cn(nc1/N=N/N(C(C)C)C(C)C)CC(C)C	X13953			10.14272/RZSNDUJLUYXXQT-CZIZESTLSA-N.1	https://dx.doi.org/10.14272/RZSNDUJLUYXXQT-CZIZESTLSA-N.1	10.14272/reaction/SA-FUHFF-UHFFFADPSC-RZSNDUJLUY-UHFFFADPSC-NUHFF-NJAII-NUHFF-ZZZ	https://dx.doi.org/10.14272/reaction/SA-FUHFF-UHFFFADPSC-RZSNDUJLUY-UHFFFADPSC-NUHFF-NJAII-NUHFF-ZZZ
O=C(N1N=Nc2c(C1)cn(n2)Cc1ccccc1)c1ccccc1	X12602		x	10.14272/WJOQJVSLWFMJNK-UHFFFAOYSA-N.1	https://dx.doi.org/10.14272/WJOQJVSLWFMJNK-UHFFFAOYSA-N.1	10.14272/reaction/SA-FUHFF-UHFFFADPSC-WJOQJVSLWF-UHFFFADPSC-NUHFF-NUHFF-NUHFF-ZZZ	https://dx.doi.org/10.14272/reaction/SA-FUHFF-UHFFFADPSC-WJOQJVSLWF-UHFFFADPSC-NUHFF-NUHFF-NUHFF-ZZZ
N#Cc1cn(nc1/N=N/N(C(C)C)C(C)C)CC	X15667			10.14272/IOAQHBXBXAUXJG-JQIJEIRASA-N.1	https://dx.doi.org/10.14272/IOAQHBXBXAUXJG-JQIJEIRASA-N.1	10.14272/reaction/SA-FUHFF-UHFFFADPSC-PTHGCHFVSV-UHFFFADPSC-NUHFF-NXOJS-NUHFF-ZZZ	https://dx.doi.org/10.14272/reaction/SA-FUHFF-UHFFFADPSC-PTHGCHFVSV-UHFFFADPSC-NUHFF-NXOJS-NUHFF-ZZZ
N#Cc1cnn(c1/N=N/N(C(C)C)C(C)C)CC	X15666			10.14272/ZTYVCHQAFNRURB-FOCLMDBBSA-N.1	https://dx.doi.org/10.14272/ZTYVCHQAFNRURB-FOCLMDBBSA-N.1	10.14272/reaction/SA-FUHFF-UHFFFADPSC-PTHGCHFVSV-UHFFFADPSC-NUHFF-NXOJS-NUHFF-ZZZ	https://dx.doi.org/10.14272/reaction/SA-FUHFF-UHFFFADPSC-PTHGCHFVSV-UHFFFADPSC-NUHFF-NXOJS-NUHFF-ZZZ
CC(=O)NCc1cn(nc1/N=N/N(C(C)C)C(C)C)C1CCCC1	X15729			10.14272/GZXDXORFZUUVGU-XUTLUUPISA-N.1	https://dx.doi.org/10.14272/GZXDXORFZUUVGU-XUTLUUPISA-N.1	10.14272/reaction/SA-FUHFF-UHFFFADPSC-GZXDXORFZU-UHFFFADPSC-NUHFF-NHIGY-NUHFF-ZZZ	https://dx.doi.org/10.14272/reaction/SA-FUHFF-UHFFFADPSC-GZXDXORFZU-UHFFFADPSC-NUHFF-NHIGY-NUHFF-ZZZ
CC(N(C(C)C)/N=N/c1nn(cc1CNC(=O)c1ccccc1)C1CCCC1)C	X16024			10.14272/SMDRKVWNQXOQTQ-SHHOIMCASA-N.1	https://dx.doi.org/10.14272/SMDRKVWNQXOQTQ-SHHOIMCASA-N.1	10.14272/reaction/SA-FUHFF-UHFFFADPSC-SMDRKVWNQX-UHFFFADPSC-NUHFF-NSKKF-NUHFF-ZZZ	https://dx.doi.org/10.14272/reaction/SA-FUHFF-UHFFFADPSC-SMDRKVWNQX-UHFFFADPSC-NUHFF-NSKKF-NUHFF-ZZZ
CC(=O)NCc1cn(nc1/N=N/N(C(C)C)C(C)C)CCOC(=O)C	X15741			10.14272/BBXJSLXPCZXILR-CZIZESTLSA-N.1	https://dx.doi.org/10.14272/BBXJSLXPCZXILR-CZIZESTLSA-N.1	10.14272/reaction/SA-FUHFF-UHFFFADPSC-BBXJSLXPCZ-UHFFFADPSC-NUHFF-NJAII-NUHFF-ZZZ	https://dx.doi.org/10.14272/reaction/SA-FUHFF-UHFFFADPSC-BBXJSLXPCZ-UHFFFADPSC-NUHFF-NJAII-NUHFF-ZZZ
CCn1cc(c(n1)/N=N/N(C(C)C)C(C)C)CNC(=O)C	X15728			10.14272/SSTDOKZYUWDQQQ-FBMGVBCBSA-N.1	https://dx.doi.org/10.14272/SSTDOKZYUWDQQQ-FBMGVBCBSA-N.1	10.14272/reaction/SA-FUHFF-UHFFFADPSC-SSTDOKZYUW-UHFFFADPSC-NUHFF-NUVCO-NUHFF-ZZZ	https://dx.doi.org/10.14272/reaction/SA-FUHFF-UHFFFADPSC-SSTDOKZYUW-UHFFFADPSC-NUHFF-NUVCO-NUHFF-ZZZ
CC(CC(=O)NCc1cn(nc1/N=N/N(C(C)C)C(C)C)Cc1ccc(cc1)C)C	X15494			10.14272/MORMFGNFEXIKDM-IMVLJIQESA-N.1	https://dx.doi.org/10.14272/MORMFGNFEXIKDM-IMVLJIQESA-N.1	10.14272/reaction/SA-FUHFF-UHFFFADPSC-MORMFGNFEX-UHFFFADPSC-NUHFF-NIWVK-NUHFF-ZZZ	https://dx.doi.org/10.14272/reaction/SA-FUHFF-UHFFFADPSC-MORMFGNFEX-UHFFFADPSC-NUHFF-NIWVK-NUHFF-ZZZ
CC(=O)NCc1cn(nc1/N=N/N(C(C)C)C(C)C)Cc1ccccc1	X13997			10.14272/VXSAZKPHEZACHZ-XTQSDGFTSA-N.1	https://dx.doi.org/10.14272/VXSAZKPHEZACHZ-XTQSDGFTSA-N.1	10.14272/reaction/SA-FUHFF-UHFFFADPSC-VXSAZKPHEZ-UHFFFADPSC-NUHFF-NQYKM-NUHFF-ZZZ	https://dx.doi.org/10.14272/reaction/SA-FUHFF-UHFFFADPSC-VXSAZKPHEZ-UHFFFADPSC-NUHFF-NQYKM-NUHFF-ZZZ
NCc1cnn(c1/N=N/N(C(C)C)C(C)C)CC(C)C	X13899		x	10.14272/SGMNZUYLCBPNEE-ISLYRVAYSA-N.1	https://dx.doi.org/10.14272/SGMNZUYLCBPNEE-ISLYRVAYSA-N.1	10.14272/reaction/SA-FUHFF-UHFFFADPSC-SGMNZUYLCB-UHFFFADPSC-NUHFF-NBSLK-NUHFF-ZZZ	https://dx.doi.org/10.14272/reaction/SA-FUHFF-UHFFFADPSC-SGMNZUYLCB-UHFFFADPSC-NUHFF-NBSLK-NUHFF-ZZZ
CC(Cn1ncc(c1/N=N/N(C(C)C)C(C)C)CNC(=O)C)C	X13526			10.14272/NFQAOFXQAVIJOU-FMQUCBEESA-N.1	https://dx.doi.org/10.14272/NFQAOFXQAVIJOU-FMQUCBEESA-N.1	10.14272/reaction/SA-FUHFF-UHFFFADPSC-NFQAOFXQAV-UHFFFADPSC-NUHFF-NGHTP-NUHFF-ZZZ	https://dx.doi.org/10.14272/reaction/SA-FUHFF-UHFFFADPSC-NFQAOFXQAV-UHFFFADPSC-NUHFF-NGHTP-NUHFF-ZZZ
CC(Cn1ncc(c1/N=N/N(C(C)C)C(C)C)CNC(=O)c1ccccc1)C	X13529			10.14272/MPFTVRYGHBGKIC-OCOZRVBESA-N.1	https://dx.doi.org/10.14272/MPFTVRYGHBGKIC-OCOZRVBESA-N.1	10.14272/reaction/SA-FUHFF-UHFFFADPSC-MPFTVRYGHB-UHFFFADPSC-NUHFF-NWMXW-NUHFF-ZZZ	https://dx.doi.org/10.14272/reaction/SA-FUHFF-UHFFFADPSC-MPFTVRYGHB-UHFFFADPSC-NUHFF-NWMXW-NUHFF-ZZZ
NCc1cnn(c1/N=N/N(C(C)C)C(C)C)Cc1ccc(cc1)C	X13552		x	10.14272/KQBXWZPQDCVAGS-QURGRASLSA-N.1	https://dx.doi.org/10.14272/KQBXWZPQDCVAGS-QURGRASLSA-N.1	10.14272/reaction/SA-FUHFF-UHFFFADPSC-KQBXWZPQDC-UHFFFADPSC-NUHFF-NBDJD-NUHFF-ZZZ	https://dx.doi.org/10.14272/reaction/SA-FUHFF-UHFFFADPSC-KQBXWZPQDC-UHFFFADPSC-NUHFF-NBDJD-NUHFF-ZZZ
CC(=O)NCc1cnn(c1/N=N/N(C(C)C)C(C)C)Cc1ccc(cc1)C	X13568			10.14272/AATCYLWHXDDRIG-WCWDXBQESA-N.1	https://dx.doi.org/10.14272/AATCYLWHXDDRIG-WCWDXBQESA-N.1	10.14272/reaction/SA-FUHFF-UHFFFADPSC-AATCYLWHXD-UHFFFADPSC-NUHFF-NWIMK-NUHFF-ZZZ	https://dx.doi.org/10.14272/reaction/SA-FUHFF-UHFFFADPSC-AATCYLWHXD-UHFFFADPSC-NUHFF-NWIMK-NUHFF-ZZZ
N#Cc1cn(nc1/N=N/N(C(C)C)C(C)C)Cc1ccc(cc1)Br	X11748			10.14272/JVCZUZVUVDDSML-LSDHQDQOSA-N.1	https://dx.doi.org/10.14272/JVCZUZVUVDDSML-LSDHQDQOSA-N.1	10.14272/reaction/SA-FUHFF-UHFFFADPSC-CYZFVCDWYP-UHFFFADPSC-NUHFF-NPQQK-NUHFF-ZZZ	https://dx.doi.org/10.14272/reaction/SA-FUHFF-UHFFFADPSC-CYZFVCDWYP-UHFFFADPSC-NUHFF-NPQQK-NUHFF-ZZZ
N#Cc1cnn(c1/N=N/N(C(C)C)C(C)C)Cc1ccc(cc1)Br	X11745			10.14272/HUNPOMLAEFCWSA-QURGRASLSA-N.1	https://dx.doi.org/10.14272/HUNPOMLAEFCWSA-QURGRASLSA-N.1	10.14272/reaction/SA-FUHFF-UHFFFADPSC-CYZFVCDWYP-UHFFFADPSC-NUHFF-NPQQK-NUHFF-ZZZ	https://dx.doi.org/10.14272/reaction/SA-FUHFF-UHFFFADPSC-CYZFVCDWYP-UHFFFADPSC-NUHFF-NPQQK-NUHFF-ZZZ
CC(=O)NCc1cnn(c1/N=N/N(C(C)C)C(C)C)Cc1ccccc1	no			10.14272/MPRWSIYLAUTZRJ-GHVJWSGMSA-N.1	https://dx.doi.org/10.14272/MPRWSIYLAUTZRJ-GHVJWSGMSA-N.1	10.14272/reaction/SA-FUHFF-UHFFFADPSC-MPRWSIYLAU-UHFFFADPSC-NUHFF-NOHLW-NUHFF-ZZZ	https://dx.doi.org/10.14272/reaction/SA-FUHFF-UHFFFADPSC-MPRWSIYLAU-UHFFFADPSC-NUHFF-NOHLW-NUHFF-ZZZ
O=C(c1ccccc1)N1N=Nc2c(C1)cn(n2)C1CCCC1	no			10.14272/JUJUWEBLNYJZJO-UHFFFAOYSA-N.1	https://dx.doi.org/10.14272/JUJUWEBLNYJZJO-UHFFFAOYSA-N.1	10.14272/reaction/SA-FUHFF-UHFFFADPSC-JUJUWEBLNY-UHFFFADPSC-NUHFF-NUHFF-NUHFF-ZZZ	https://dx.doi.org/10.14272/reaction/SA-FUHFF-UHFFFADPSC-JUJUWEBLNY-UHFFFADPSC-NUHFF-NUHFF-NUHFF-ZZZ
CC(CC(=O)N1N=Nc2c(C1)cn(n2)Cc1ccc(cc1)C)C	no			10.14272/KEQOQOHNHBUGFW-UHFFFAOYSA-N.1	https://dx.doi.org/10.14272/KEQOQOHNHBUGFW-UHFFFAOYSA-N.1	10.14272/reaction/SA-FUHFF-UHFFFADPSC-KEQOQOHNHB-UHFFFADPSC-NUHFF-NUHFF-NUHFF-ZZZ	https://dx.doi.org/10.14272/reaction/SA-FUHFF-UHFFFADPSC-KEQOQOHNHB-UHFFFADPSC-NUHFF-NUHFF-NUHFF-ZZZ
CC(=O)OCCn1nc2c(c1)CN(N=N2)C(=O)C	no			10.14272/KPRSIIAWIWZXCG-UHFFFAOYSA-N.1	https://dx.doi.org/10.14272/KPRSIIAWIWZXCG-UHFFFAOYSA-N.1	10.14272/reaction/SA-FUHFF-UHFFFADPSC-KPRSIIAWIW-UHFFFADPSC-NUHFF-NUHFF-NUHFF-ZZZ	https://dx.doi.org/10.14272/reaction/SA-FUHFF-UHFFFADPSC-KPRSIIAWIW-UHFFFADPSC-NUHFF-NUHFF-NUHFF-ZZZ
